# Supplementary material for: Separation of benzene and toluene associated with vapochromic behaviors by hybrid[4]arene-based co-crystals
Source: PubMed Central journal article supplement (PMC10858960; doi:10.1038/s41467-024-45592-6), 2024-02-10
Supplement: 41467_2024_45592_MOESM1_ESM.pdf [file 41467_2024_45592_MOESM1_ESM.pdf]

---

## Supplementary Information

### **Separation of benzene and toluene associated with vapochromic behaviors by hybrid[4]arene-based co-crystals**

Jingyu Chen,<sup>1</sup> Wenjie Zhang,<sup>1</sup> Wenzhi Yang,<sup>1</sup> Fengcheng Xi,<sup>1</sup> Hongyi He,<sup>1</sup> Minghao Liang,<sup>1</sup> Qian Dong,<sup>1</sup> Jiawang Hou,<sup>1</sup> Mengbin Wang,<sup>2\*</sup> Guocan Yu,<sup>3\*</sup> and Jiong Zhou<sup>1\*</sup>

<sup>1</sup> Department of Chemistry, College of Sciences, Northeastern University, Shenyang 110819, P. R. China.

<sup>2</sup> ZJU-Hangzhou Global Scientific and Technological Innovation Center, Zhejiang University, Hangzhou 311215, P. R. China.

<sup>3</sup> Key Laboratory of Bioorganic Phosphorus Chemistry & Chemical Biology, Department of Chemistry, Tsinghua University, Beijing 100084, P. R. China.

\* Corresponding author, E-mail: 21737055@zju.edu.cn; guocanyu@mail.tsinghua.edu.cn; zhoujiong@mail.neu.edu.cn

---

## Table of Contents

|                                                                                                                  |    |
|------------------------------------------------------------------------------------------------------------------|----|
| 1. Supplementary Methods                                                                                         | 3  |
| 2. Supplementary Discussion                                                                                      | 4  |
| 2.1 Synthesis of hybrid[4]arene                                                                                  | 4  |
| 2.2 Crystallography data                                                                                         | 10 |
| 2.3 Characterization of the complexation of 1,2,4,5-tetracyanobenzene (TCNB) with hybrid[4]arene (H) in solution | 13 |
| 2.4 Non-covalent interaction analysis in single crystal structure of H-TCNB@CH <sub>2</sub> Cl <sub>2</sub>      | 17 |
| 2.5 Characterization of H-TCNB $\alpha$                                                                          | 21 |
| 2.6 Single-component adsorption experiments                                                                      | 24 |
| 2.7 Non-covalent interaction analysis in single crystal structure of H-TCNB@Bz                                   | 33 |
| 2.8 Selectivity experiments of H-TCNB $\alpha$ for the mixture vapors of Bz and Cy                               | 37 |
| 2.9 Selectivity experiments of H-TCNB $\alpha$ for the mixture vapors of Tol and Py                              | 39 |
| 2.10 Purity experiments of liquid Cy or Py by H-TCNB $\alpha$                                                    | 43 |
| 2.11 Recyclability of H-TCNB $\alpha$                                                                            | 51 |
| 2.12 Vapochromic behaviors experiments based on co-crystals of DON-TCNB $\alpha$ and DOB-TCNB $\alpha$           | 64 |
| 3. Supplementary Reference                                                                                       | 66 |

---

## 1. Supplementary Methods

Starting materials and reagents including TCNB, Bz, Cy, Tol and Py were purchased from commercial suppliers and used without further purification unless stated otherwise. Compound H was prepared according to a previous reported literature.<sup>1</sup> <sup>1</sup>H and <sup>13</sup>C NMR spectra were recorded at 298 K on a Bruker AVANCEIII 400-MHz instrument at room temperature. Chemical shifts were referenced to tetramethylsilane. Powder X-ray diffraction (PXRD) measurements were collected on a PANalytical B.V. Empyrean powder diffractometer operating at 40 kV/30 mA using the Cu K $\alpha$  line ( $\lambda = 1.5418 \text{ \AA}$ ), and data were measured over the range 5° to 40° in 5°/min steps over 7 min. Single-crystal X-ray diffraction data were collected by a Bruker D8 Venture diffractometer equipped with a PHOTON 100 CMOS detector, using Ga-K $\alpha$  radiation ( $\lambda = 1.34139 \text{ \AA}$ ) and Mo-K $\alpha$  radiation ( $\lambda = 0.71073 \text{ \AA}$ ). The structures were solved with SHELXT program using Direct Methods or Intrinsic Phasing; refined by full-matrix least-squares on  $|F|^2$  by SHELXL; and interfaced through the program OLex2. Thermogravimetric analysis (TGA) and differential scanning calorimetry (DSC) experiment were carried out using a simultaneous thermal analyzer 449 F3 analyzer (NETZSCH Instruments) with an automated vertical overhead thermobalance. The samples were heated at 10 °C/min using N<sub>2</sub> as the protective gas. Fluorescent titration experiments were performed on a Shimadzu RF-5301PC spectrometer. UV-vis spectra in solution were collected on a Shimadzu UV-2550 spectrometer. Solid-state UV-visible spectra were measured by a reflectance mode on a PerkinElmer Lambda950 spectrometer from 200 to 800 nm with BaSO<sub>4</sub> as a reference. Energy-minimized structure and electrostatic potential surface (EPS) were calculated by density functional theory (DFT) using the B3LYP hybrid function combined with 6-31G(d,p) basis set under Gaussian G09. Using single crystal superstructures as input files, independent gradient model (IGM) analyses were carried out by Multiwfn 3.6 program through function 20 (visual study of weak interaction) and visualized using VMD software. Gas Chromatography (GC) Analysis: GC measurements were carried out using an Agilent 7890B instrument configured with an FID detector and a DB-624 column (30 m  $\times$  0.53 mm  $\times$  3.0  $\mu$ m). Samples were analyzed using headspace injections and were performed by incubating the sample at 100 °C for 10 min followed by sampling 1 mL of the headspace. The following GC method was used: the oven was programmed from 50 °C, and ramped in 10 °C min<sup>-1</sup> increments to 150 °C with 15 min hold; the total run time was 25 min; the injection temperature was 250 °C; the detector temperature was 280 °C with nitrogen, air, and make-up flow rates of 35, 350, and 35 mL min<sup>-1</sup>, respectively.

## 2. Supplementary Discussion

### 2.1. Synthesis of hybrid[4]arene

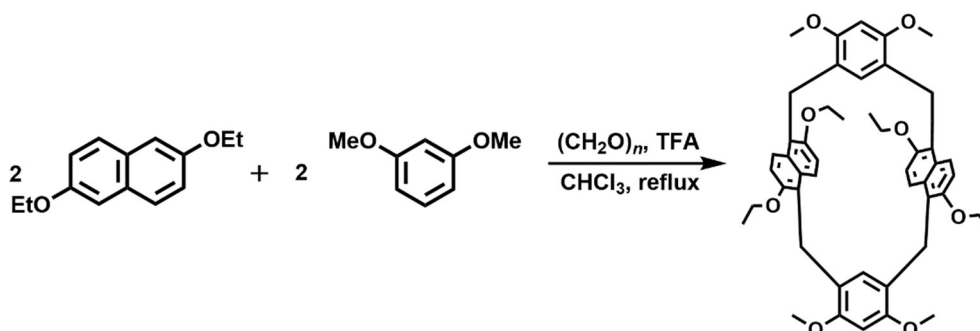

Synthesis of hybrid[4]arene (H): To the solution of 2,6-diethoxynaphthalene (2.16 g, 10.0 mmol) and 1,3-dimethoxybenzene (1.38 g, 20.0 mmol) in  $\text{CHCl}_3$  (200 mL), paraformaldehyde (0.600 g, 30.0 mmol) and TFA (10.0 mL) were added. The mixture was refluxed for 35 min. After the reaction was finished, a saturated aqueous solution of  $\text{Na}_2\text{CO}_3$  was added to neutralize TFA. The organic phase was separated and the crude product was purified by column chromatography (petroleum ether/ $\text{CH}_2\text{Cl}_2$ ,  $v/v$  2:1) to get hybrid[4]arene (H) as a white solid (3.78 g, 50%), mp: 240-241 °C. The  $^1\text{H}$  NMR spectrum of H is shown in Supplementary Figure 1.  $^1\text{H}$  NMR (500 MHz,  $\text{CD}_2\text{Cl}_2$ , 293 K)  $\delta$  (ppm): 7.24 (d,  $J = 10$  Hz, 4H), 6.85 (d,  $J = 10$  Hz, 4H), 6.63 (s, 2H), 5.71 (s, 2H), 4.51 (s, 2H), 4.47 (s, 2H), 3.99 (s, 12H), 3.95–3.93 (m, 4H), 3.91–3.88 (m, 4H), 3.70 (s, 2H), 3.66 (s, 2H), 1.24 (t,  $J = 15$  Hz, 12H). The  $^{13}\text{C}$  NMR spectrum of H is shown in Supplementary Figure 2.  $^{13}\text{C}$  NMR (125 MHz,  $\text{CD}_2\text{Cl}_2$ , 293 K)  $\delta$  (ppm): 156.32, 152.75, 130.02, 128.78, 124.21, 122.72, 120.73, 116.87, 95.17, 66.53, 66.53, 56.18, 54.26, 54.04, 53.83, 53.61, 53.39, 24.11, 15.50. Electrospray ionization mass spectrum of H is shown in Supplementary Figure 3:  $m/z$  779.34  $[\text{M} + \text{Na}]^+$ , 795.30  $[\text{M} + \text{K}]^+$ . Electrospray ionization high resolution mass spectrum of H is shown in Supplementary Figure 4:  $m/z$  calcd for 779.3555  $[\text{M} + \text{Na}]^+ \text{C}_{48}\text{H}_{52}\text{O}_8\text{Na}^+$ ; found 779.3557; error  $-0.3$  ppm.

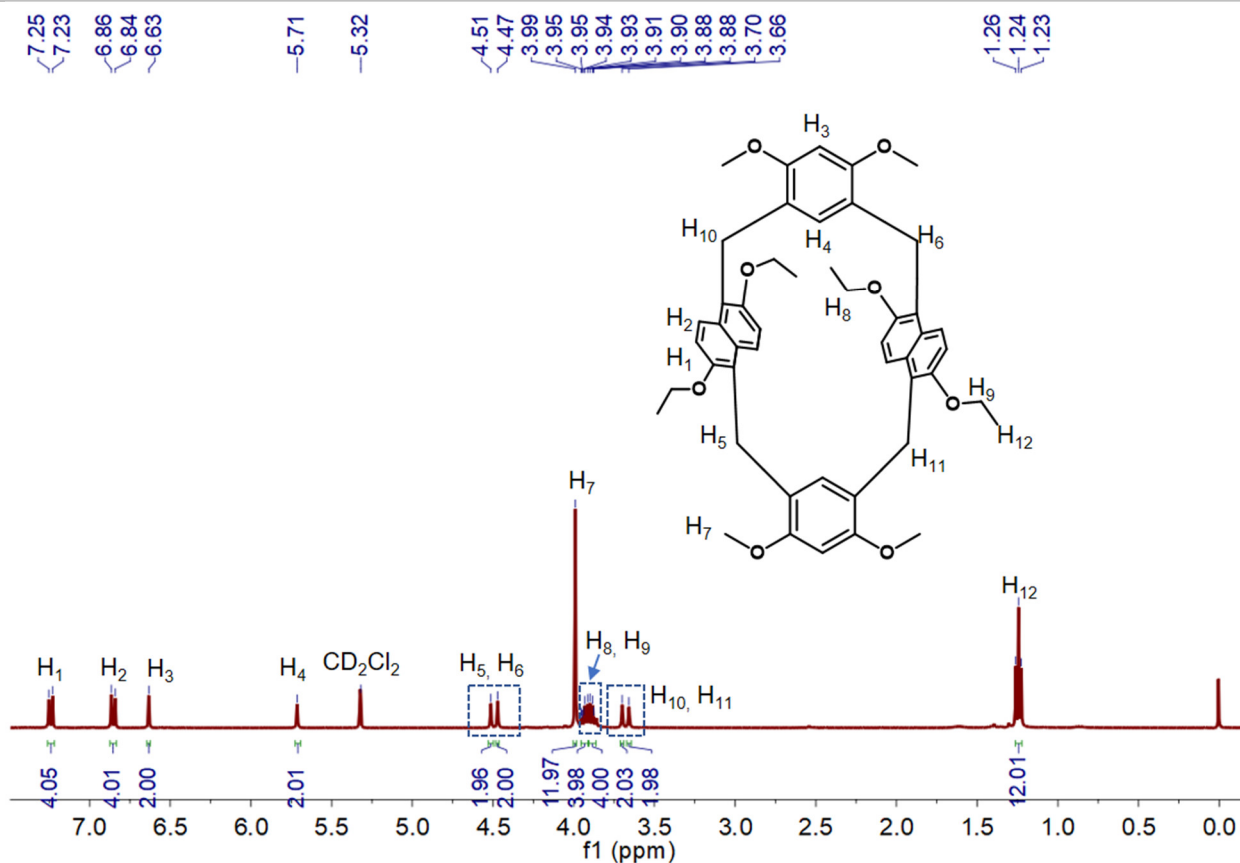

**Supplementary Figure 1.** <sup>1</sup>H NMR spectrum (500 MHz, CD<sub>2</sub>Cl<sub>2</sub>, 293 K) of H.

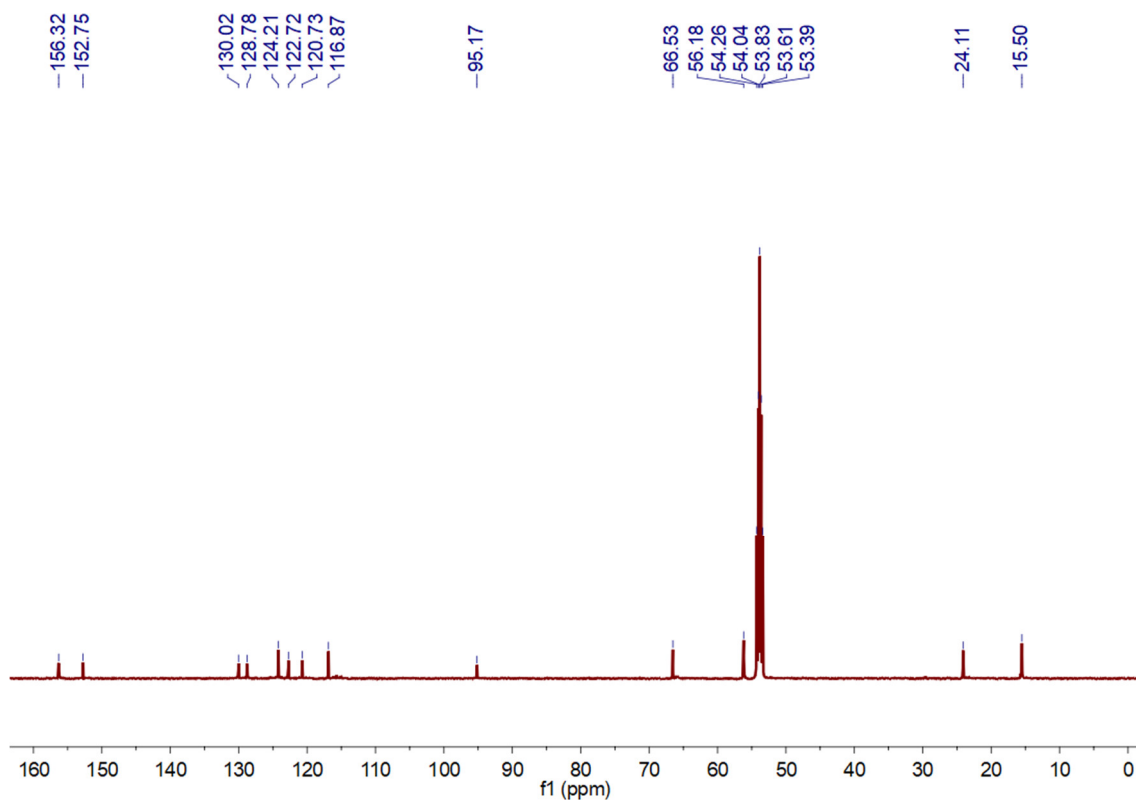

**Supplementary Figure 2.** <sup>13</sup>C NMR spectrum (125 MHz, CD<sub>2</sub>Cl<sub>2</sub>, 293 K) of H.

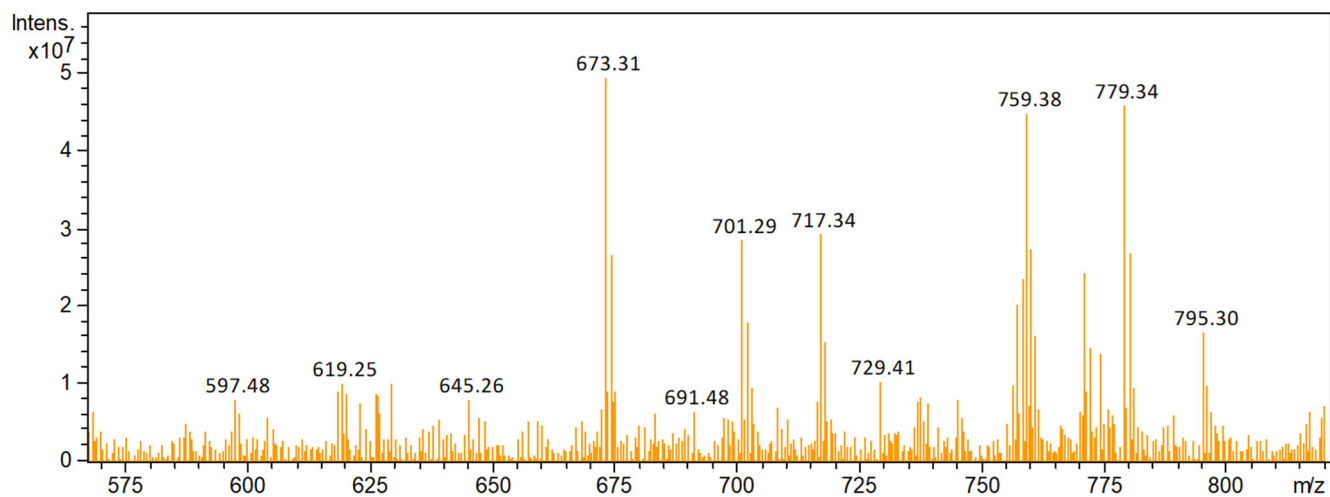

**Supplementary Figure 3.** Electrospray ionization mass spectrum of H. Assignment of main peaks:  $m/z$  779.34  $[M + Na]^+$ , 795.30  $[M + K]^+$ .

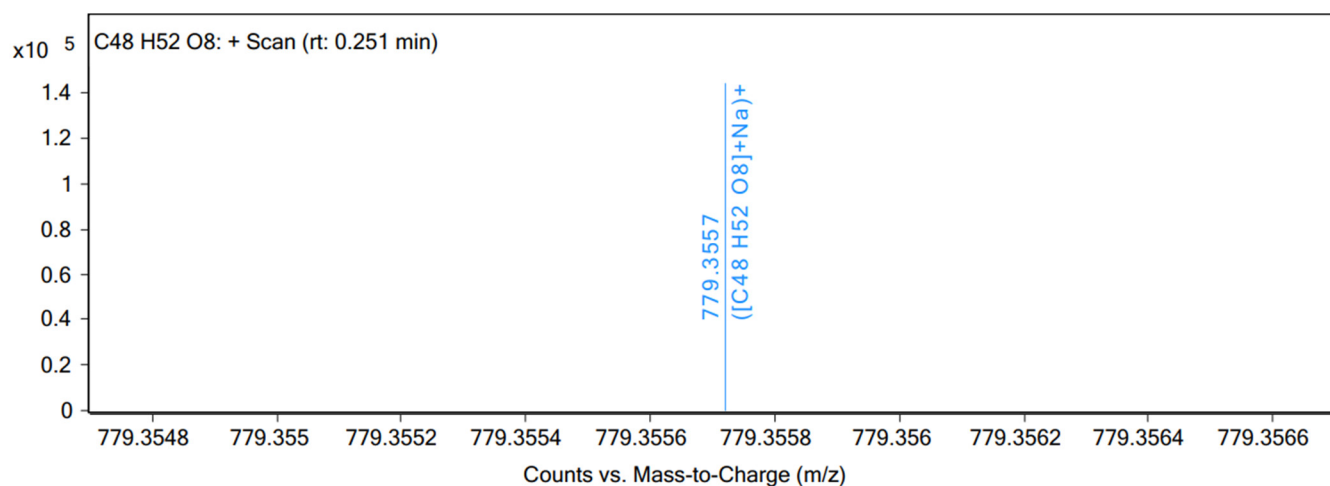

**Supplementary Figure 4.** Electrospray ionization high resolution mass spectrum of H. Assignment of main peak:  $m/z$  779.3557  $[M + Na]^+$ .

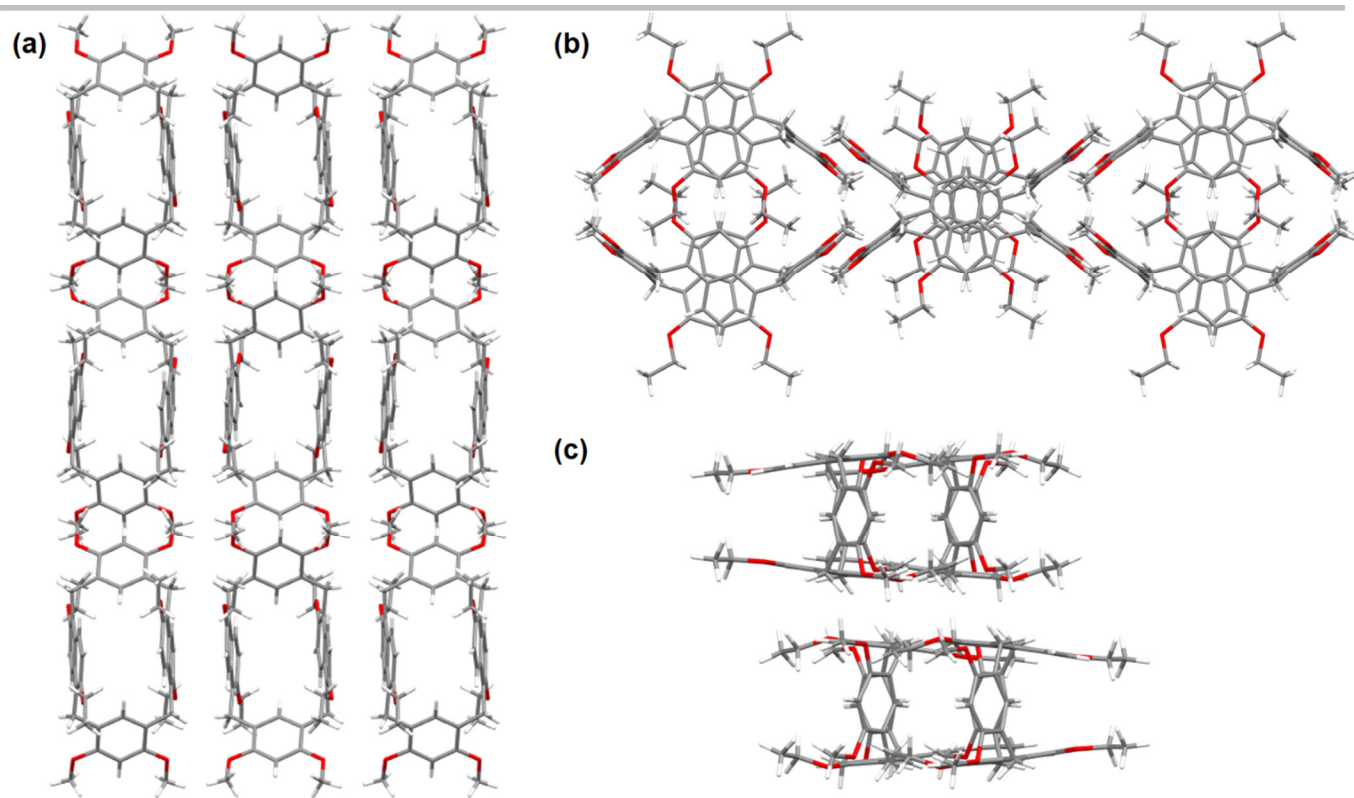

**Supplementary Figure 5.** Three views of the crystal packing structure of H. (a) *a*-axis, (b) *b*-axis and (c) *c*-axis.

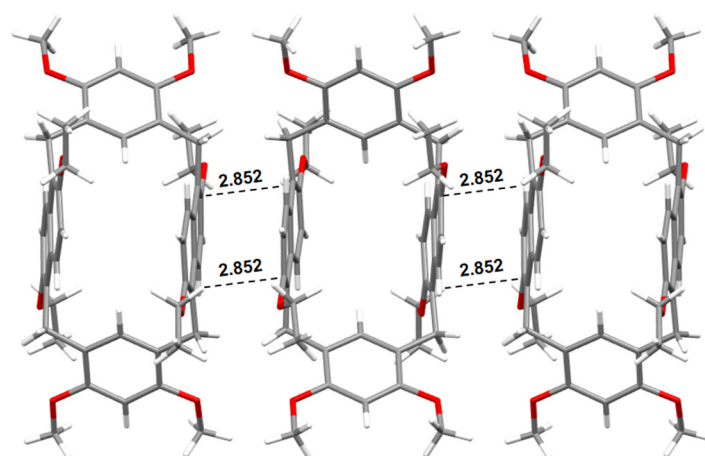

**Supplementary Figure 6.** H was arranged parallel to its neighbor H through intermolecular C-H... $\pi$  interactions. C-H... $\pi$  distance: 2.852 Å.

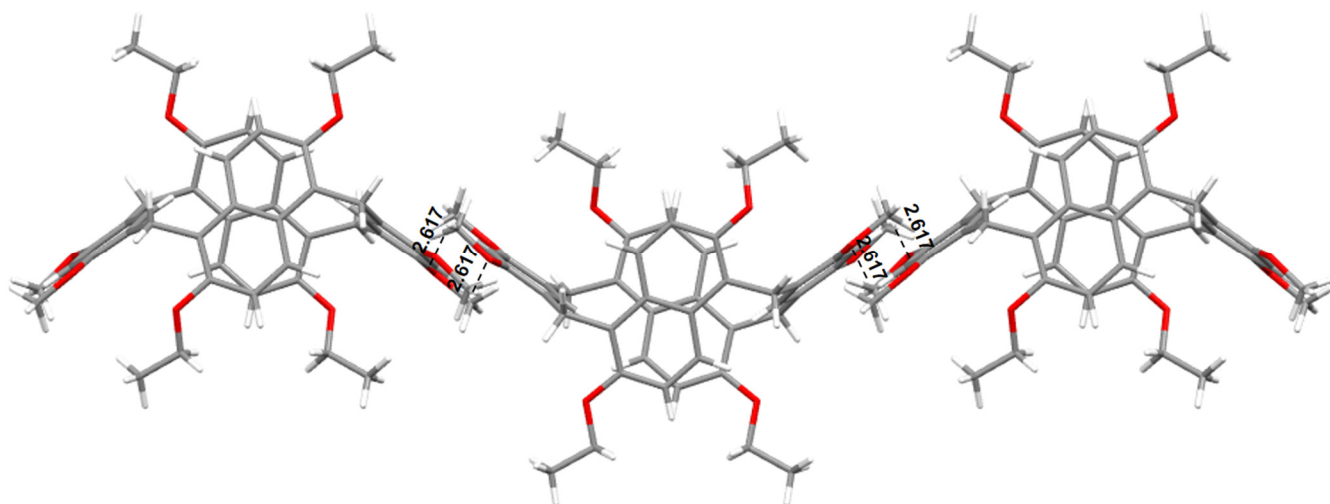

**Supplementary Figure 7.** The crystal packing structure of H along *b*-axis. H was arranged parallel to its neighbor H through intermolecular C-H...O interactions. C-H...O distance: 2.671 Å.

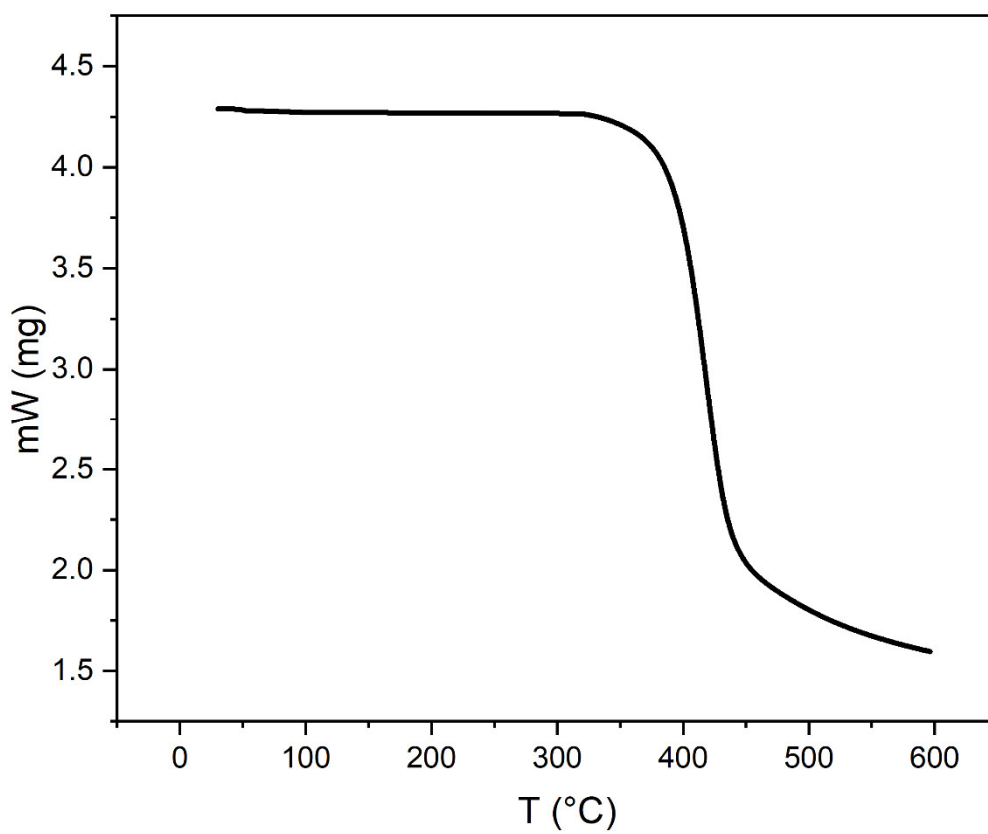

**Supplementary Figure 8.** Thermogravimetric analysis of H $\alpha$ .



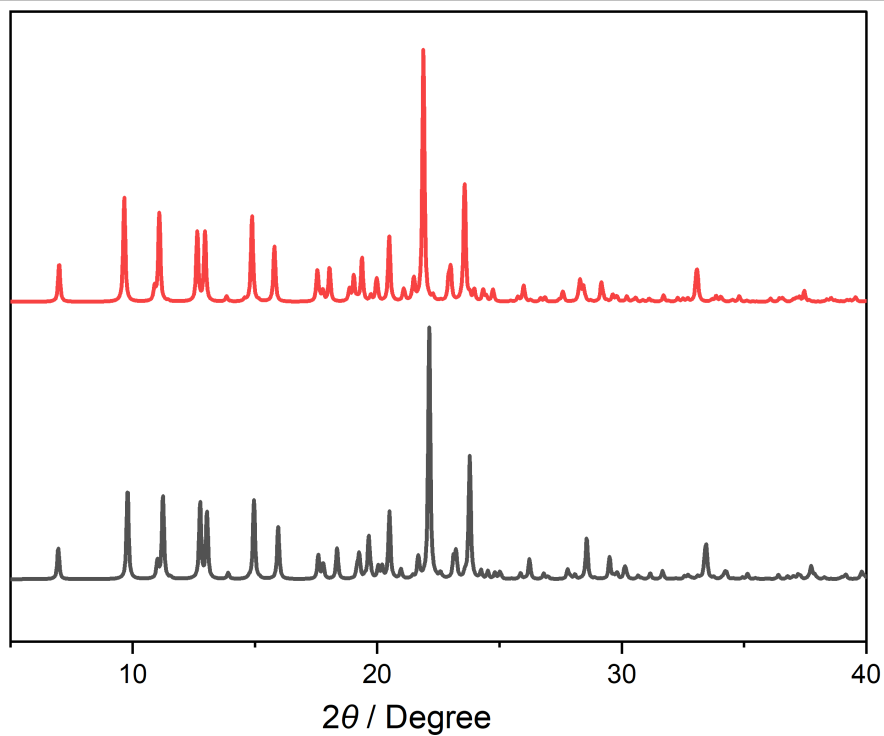

**Supplementary Figure 9.** Powder X-ray diffraction patterns of H: black line, original H $\alpha$ ; red line, simulated from single crystal structure of H.

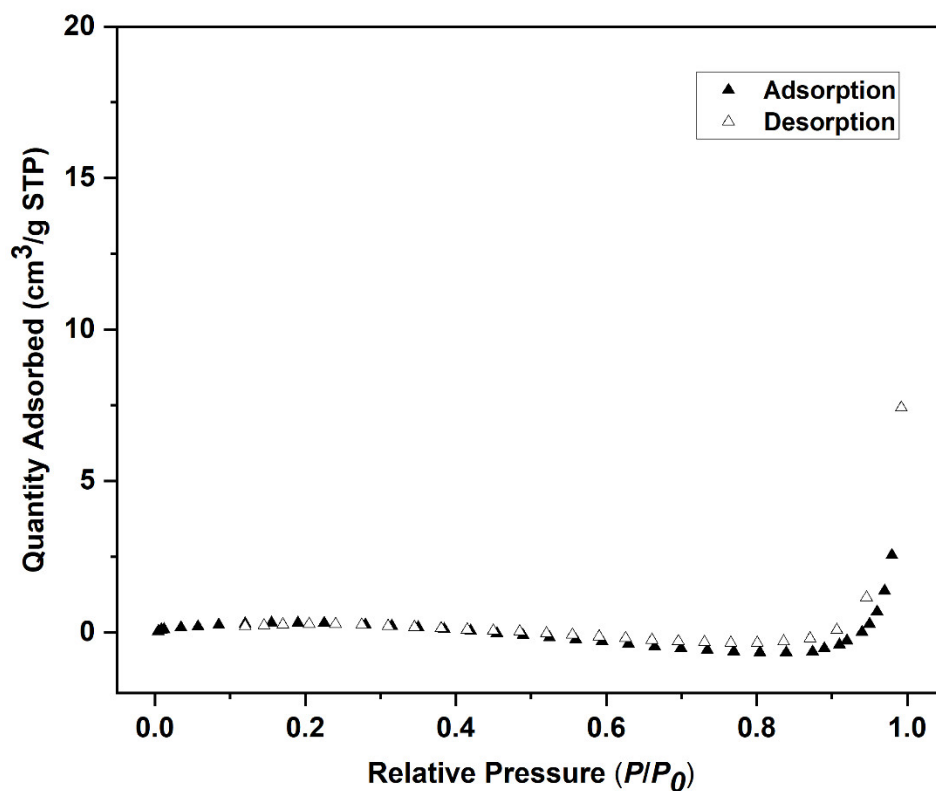

**Supplementary Figure 10.** N<sub>2</sub> adsorption-desorption isotherm of H $\alpha$ . The BET surface area value is 0.820 m<sup>2</sup>/g. Adsorption, closed symbols; desorption, open symbols.

---

## 2.2 Crystallography data

**Supplementary Table 1.** Experimental single crystal X-ray data for H.

| Formula                                               | H                                                               |
|-------------------------------------------------------|-----------------------------------------------------------------|
| Crystallization Solvent                               | CH <sub>2</sub> Cl <sub>2</sub>                                 |
| Collection Temperature (K)                            | 170(2)                                                          |
| Formula                                               | C <sub>48</sub> H <sub>52</sub> O <sub>8</sub>                  |
| Formula Weight                                        | 756.89                                                          |
| Crystal System                                        | Orthorhombic                                                    |
| Space Group                                           | <i>Pbcn</i>                                                     |
| <i>a</i> [Å]                                          | 25.3974(9)                                                      |
| <i>b</i> [Å]                                          | 9.6581(5)                                                       |
| <i>c</i> [Å]                                          | 16.0561(7)                                                      |
| $\alpha$ [°]                                          | 90                                                              |
| $\beta$ [°]                                           | 90                                                              |
| $\gamma$ [°]                                          | 90                                                              |
| <i>V</i> [Å <sup>3</sup> ]                            | 3938.4(3)                                                       |
| <i>Z</i>                                              | 4                                                               |
| <i>D</i> <sub>calcd</sub> [g cm <sup>-3</sup> ]       | 1.277                                                           |
| Absorption coefficient (mm <sup>-1</sup> )            | 0.086                                                           |
| <i>F</i> (000)                                        | 1616.0                                                          |
| Theta range [°]                                       | 4.512 to 54.24                                                  |
| Reflections collected / unique                        | 57861 [ <i>R</i> <sub>int</sub> = 0.0441]                       |
| Data / restraints / parameters                        | 4353 / 18 / 267                                                 |
| Final <i>R</i> indices [ <i>I</i> > 2σ( <i>I</i> )]   | <i>R</i> <sub>1</sub> = 0.0399, <i>wR</i> <sub>2</sub> = 0.1017 |
| <i>R</i> indices (all data)                           | <i>R</i> <sub>1</sub> = 0.0515, <i>wR</i> <sub>2</sub> = 0.1104 |
| Goodness-of-fit on <i>F</i> <sup>2</sup>              | 1.034                                                           |
| Largest difference peak and hole [e.Å <sup>-3</sup> ] | 0.21 and -0.17                                                  |
| CCDC                                                  | 2244801                                                         |

---

**Supplementary Table 2.** Experimental single crystal X-ray data for H-TCNB@CH<sub>2</sub>Cl<sub>2</sub>.

| Formula                                               | H-TCNB@CH <sub>2</sub> Cl <sub>2</sub>                                        |
|-------------------------------------------------------|-------------------------------------------------------------------------------|
| Crystallization Solvent                               | CH <sub>2</sub> Cl <sub>2</sub>                                               |
| Collection Temperature (K)                            | 273(2)                                                                        |
| Formula                                               | C <sub>60</sub> H <sub>58</sub> Cl <sub>4</sub> N <sub>4</sub> O <sub>8</sub> |
| Formula Weight                                        | 1104.90                                                                       |
| Crystal System                                        | Orthorhombic                                                                  |
| Space Group                                           | <i>Fdd2</i>                                                                   |
| <i>a</i> [Å]                                          | 26.7226(9)                                                                    |
| <i>b</i> [Å]                                          | 35.7156(12)                                                                   |
| <i>c</i> [Å]                                          | 11.5081(4)                                                                    |
| $\alpha$ [°]                                          | 90                                                                            |
| $\beta$ [°]                                           | 90                                                                            |
| $\gamma$ [°]                                          | 90                                                                            |
| <i>V</i> [Å <sup>3</sup> ]                            | 10983.5(6)                                                                    |
| <i>Z</i>                                              | 8                                                                             |
| <i>D</i> <sub>calcd</sub> [g cm <sup>-3</sup> ]       | 1.336                                                                         |
| Absorption coefficient (mm <sup>-1</sup> )            | 0.275                                                                         |
| <i>F</i> (000)                                        | 4624.0                                                                        |
| Theta range [°]                                       | 2.95 to 26.40                                                                 |
| Reflections collected / unique                        | 13330 / 4718 [ <i>R</i> <sub>int</sub> = 0.0203]                              |
| Data / restraints / parameters                        | 4718 / 1 / 347                                                                |
| Final <i>R</i> indices [ <i>I</i> > 2σ( <i>I</i> )]   | <i>R</i> <sub>1</sub> = 0.0817, <i>wR</i> <sub>2</sub> = 0.0817               |
| <i>R</i> indices (all data)                           | <i>R</i> <sub>1</sub> = 0.0842, <i>wR</i> <sub>2</sub> = 0.0842               |
| Goodness-of-fit on <i>F</i> <sup>2</sup>              | 1.054                                                                         |
| Largest difference peak and hole [e.Å <sup>-3</sup> ] | 0.254 and -0.342                                                              |
| CCDC                                                  | 2244721                                                                       |

**Supplementary Table 3.** Experimental single crystal X-ray data for H-TCNB@Bz.

| Formula                                               | H-TCNB@Bz                                                       |
|-------------------------------------------------------|-----------------------------------------------------------------|
| Crystallization Solvent                               | benzene                                                         |
| Collection Temperature (K)                            | 170(2)                                                          |
| Formula                                               | C <sub>70</sub> H <sub>66</sub> N <sub>4</sub> O <sub>8</sub>   |
| Formula Weight                                        | 1091.27                                                         |
| Crystal System                                        | Orthorhombic                                                    |
| Space Group                                           | <i>Fdd2</i>                                                     |
| <i>a</i> [Å]                                          | 26.4248(8)                                                      |
| <i>b</i> [Å]                                          | 36.2735(16)                                                     |
| <i>c</i> [Å]                                          | 11.9131(3)                                                      |
| $\alpha$ [°]                                          | 90                                                              |
| $\beta$ [°]                                           | 90                                                              |
| $\gamma$ [°]                                          | 90                                                              |
| <i>V</i> [Å <sup>3</sup> ]                            | 11418.9(7)                                                      |
| <i>Z</i>                                              | 8                                                               |
| <i>D</i> <sub>calcd</sub> [g cm <sup>-3</sup> ]       | 1.270                                                           |
| Absorption coefficient (mm <sup>-1</sup> )            | 0.083                                                           |
| <i>F</i> (000)                                        | 4624.0                                                          |
| Theta range [°]                                       | 4.492 to 54.22                                                  |
| Reflections collected / unique                        | 32095 / 6116 [ <i>R</i> <sub>int</sub> = 0.0415]                |
| Data / restraints / parameters                        | 6116 / 1 / 374                                                  |
| Final <i>R</i> indices [ <i>I</i> > 2σ( <i>I</i> )]   | <i>R</i> <sub>1</sub> = 0.0323, <i>wR</i> <sub>2</sub> = 0.0323 |
| <i>R</i> indices (all data)                           | <i>R</i> <sub>1</sub> = 0.0372, <i>wR</i> <sub>2</sub> = 0.0372 |
| Goodness-of-fit on <i>F</i> <sup>2</sup>              | 1.045                                                           |
| Largest difference peak and hole [e.Å <sup>-3</sup> ] | 0.127 and -0.196                                                |
| CCDC                                                  | 2244722                                                         |

### 2.3. Characterization of the complexation of 1,2,4,5-tetracyanobenzene (TCNB) with hybrid[4]arene (H) in solution

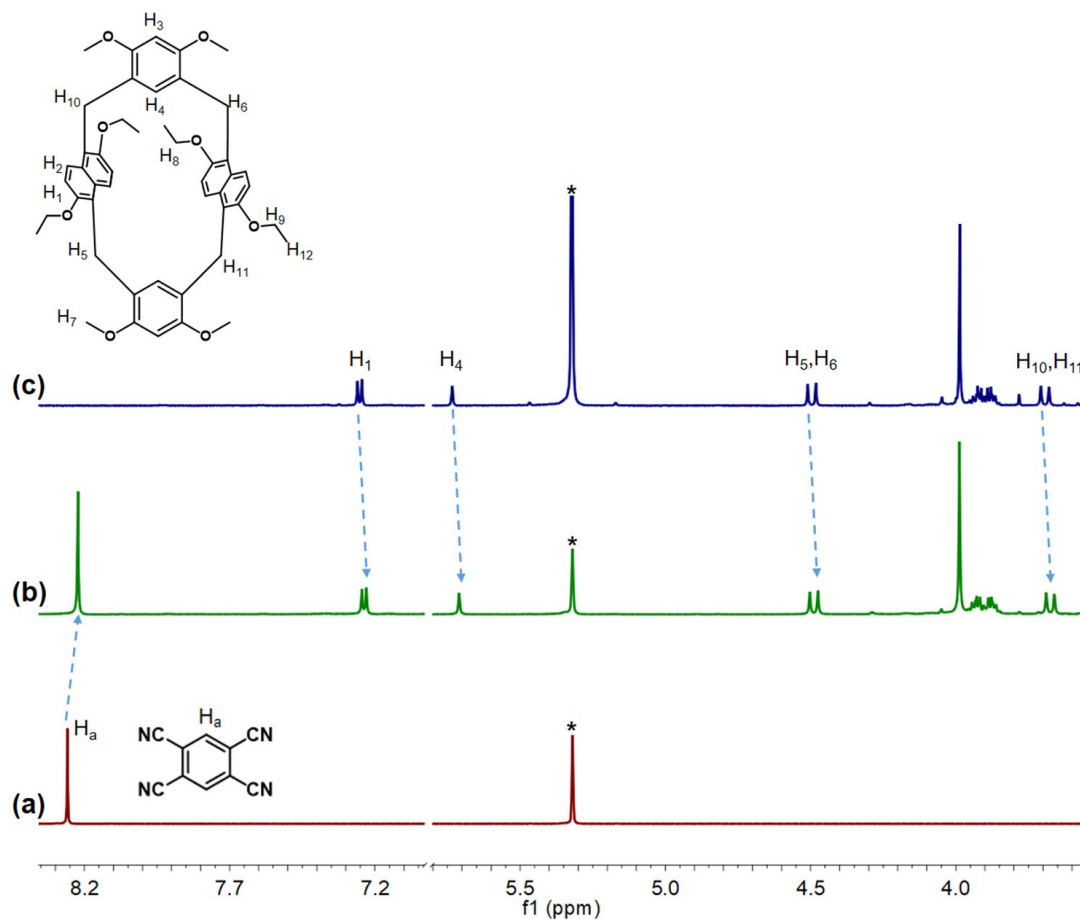

**Supplementary Figure 11.** Partial <sup>1</sup>H NMR spectra (500 MHz, CD<sub>2</sub>Cl<sub>2</sub>, 293 K) of (a) free TCNB (10.0 mM), (b) H (10.0 mM) and TCNB (10.0 mM), and (c) free H (10.0 mM). (\*: solvent residues)

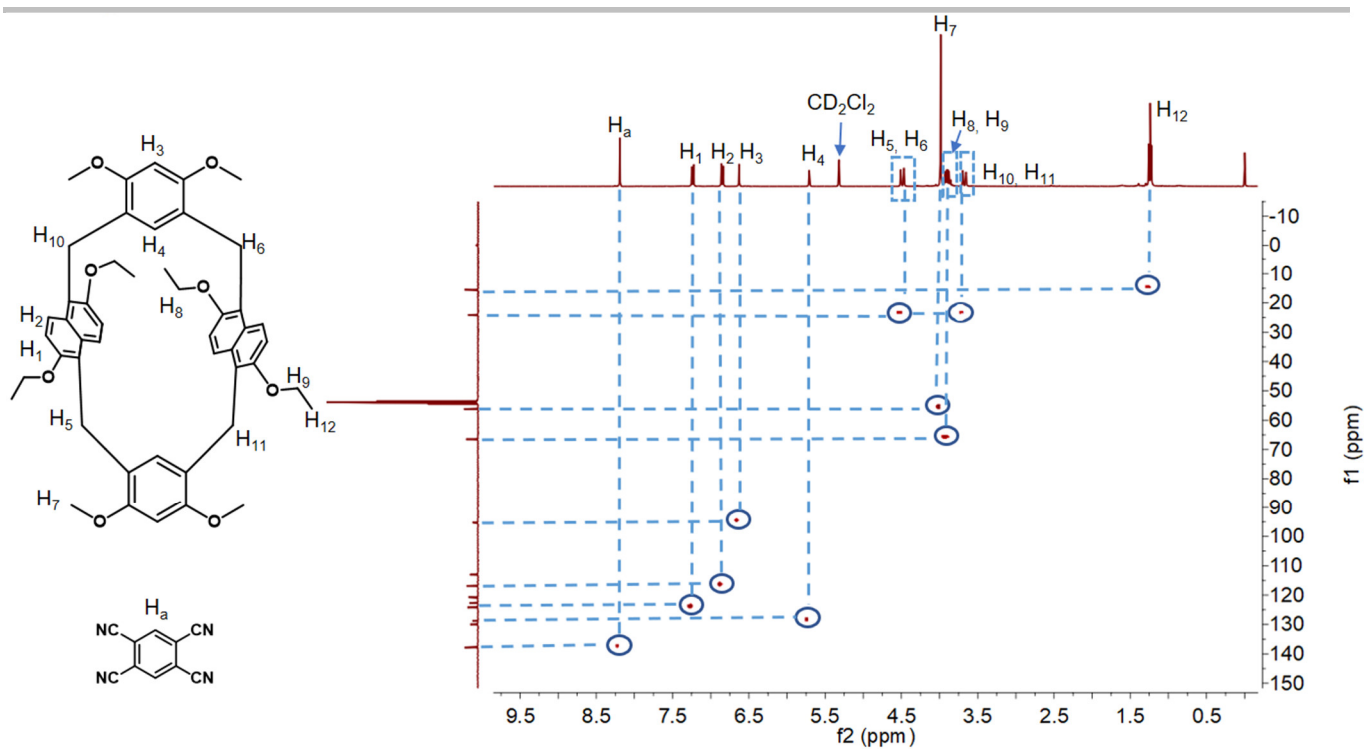

**Supplementary Figure 12.** HSQC spectrum (500 MHz,  $\text{CD}_2\text{Cl}_2$ , 298 K) of H (10.0 mM) with TCNB (10.0 mM).

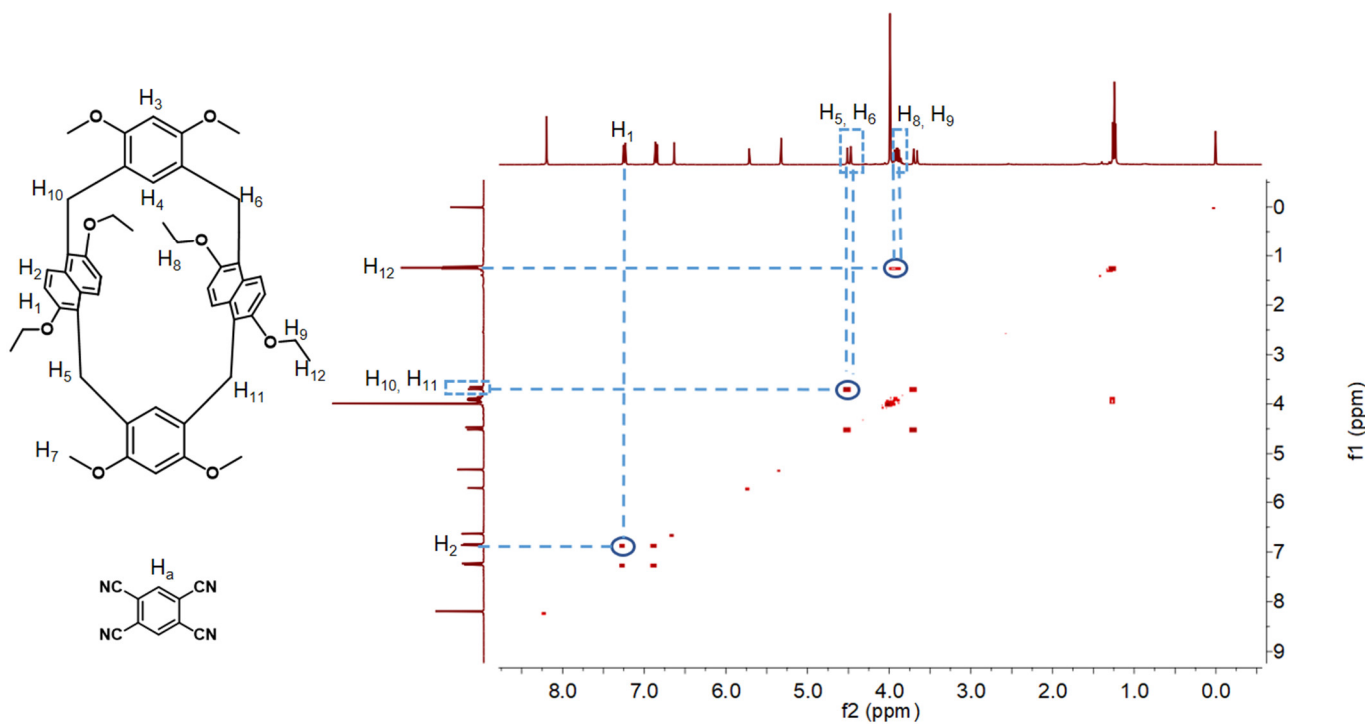

**Supplementary Figure 13.** 2D COSY spectrum (500 MHz,  $\text{CD}_2\text{Cl}_2$ , 298 K) of H (10.0 mM) with TCNB (10.0 mM).

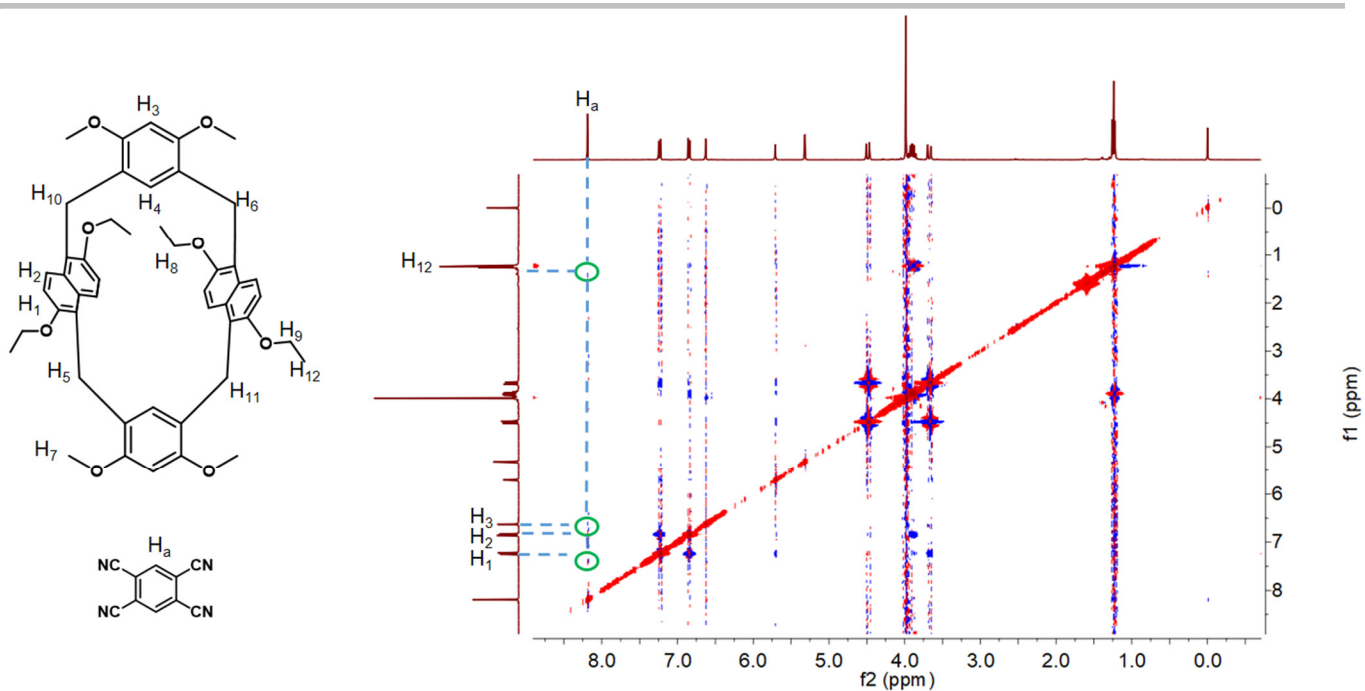

**Supplementary Figure 14.** 2D NOSEY spectrum (500 MHz, CD<sub>2</sub>Cl<sub>2</sub>, 298 K) of H (10.0 mM) with TCNB (10.0 mM).

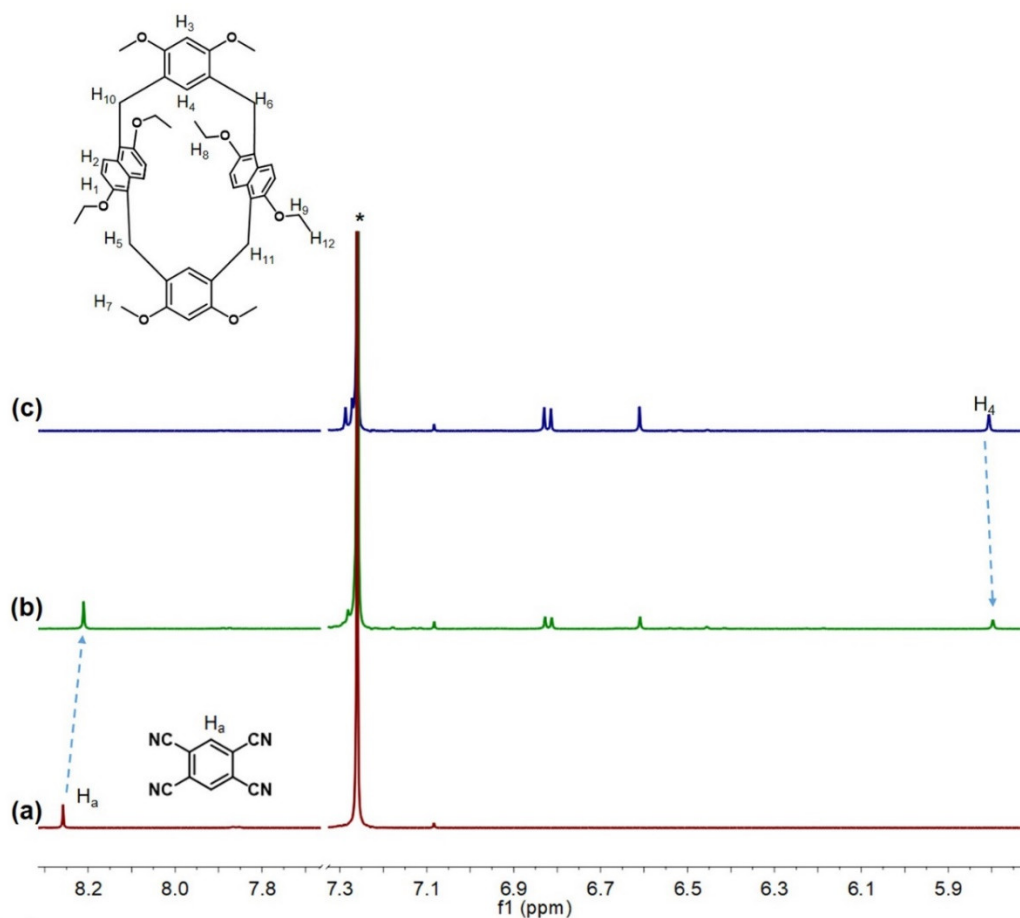

**Supplementary Figure 15.** Partial <sup>1</sup>H NMR spectra (500 MHz, CDCl<sub>3</sub>, 293 K) of (a) free TCNB (10.0 mM), (b) H (10.0 mM) and TCNB (10.0 mM), and (c) free H (10.0 mM). (\*: solvent residues)

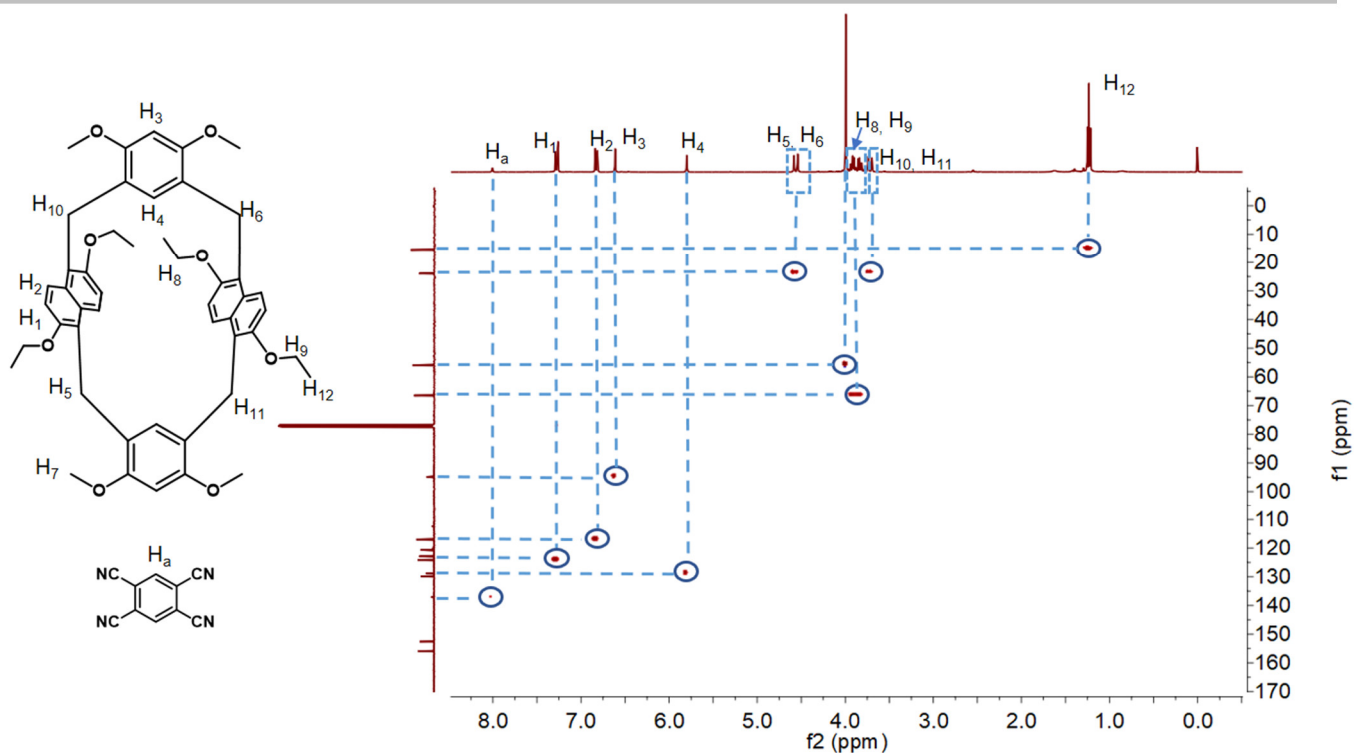

**Supplementary Figure 16.** HSQC spectrum (500 MHz, CDCl<sub>3</sub>, 298 K) of H (10.0 mM) with TCNB (10.0 mM).

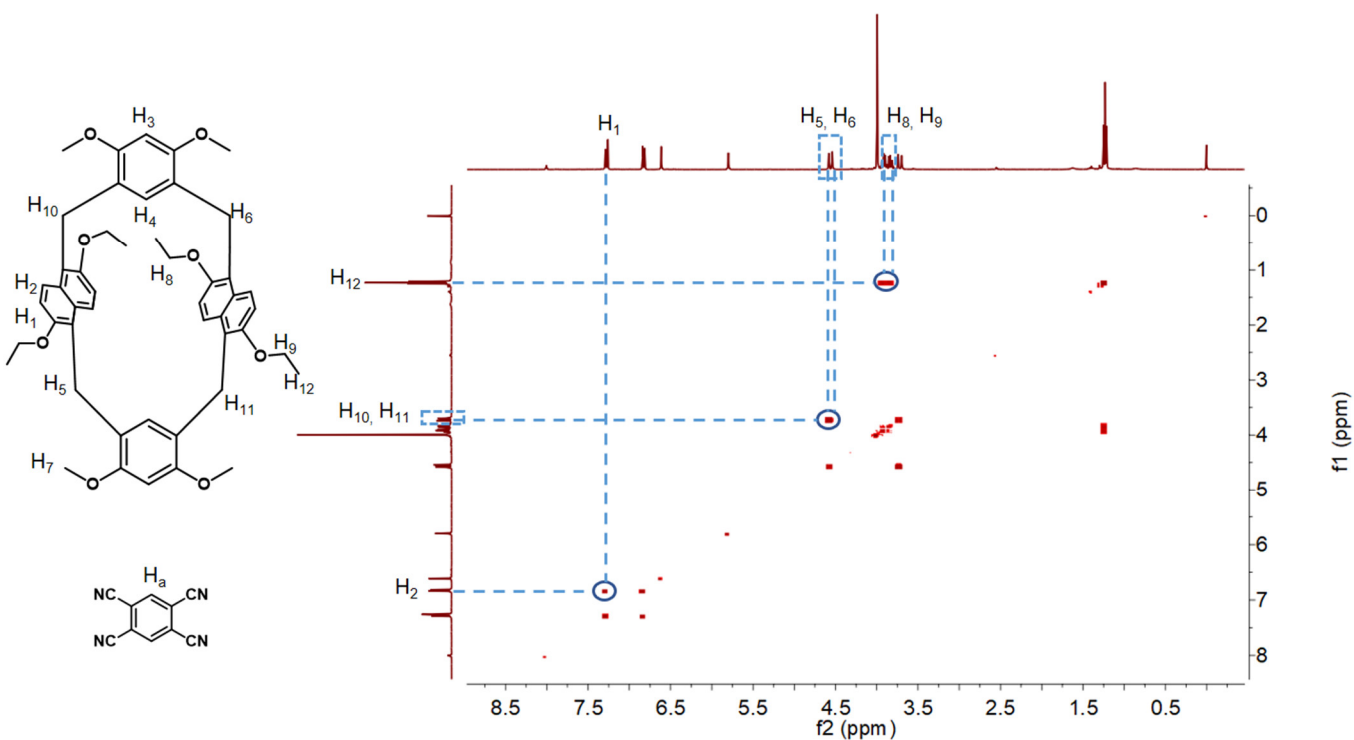

**Supplementary Figure 17.** 2D COSY spectrum (500 MHz, CDCl<sub>3</sub>, 298 K) of H (10.0 mM) with TCNB (10.0 mM).



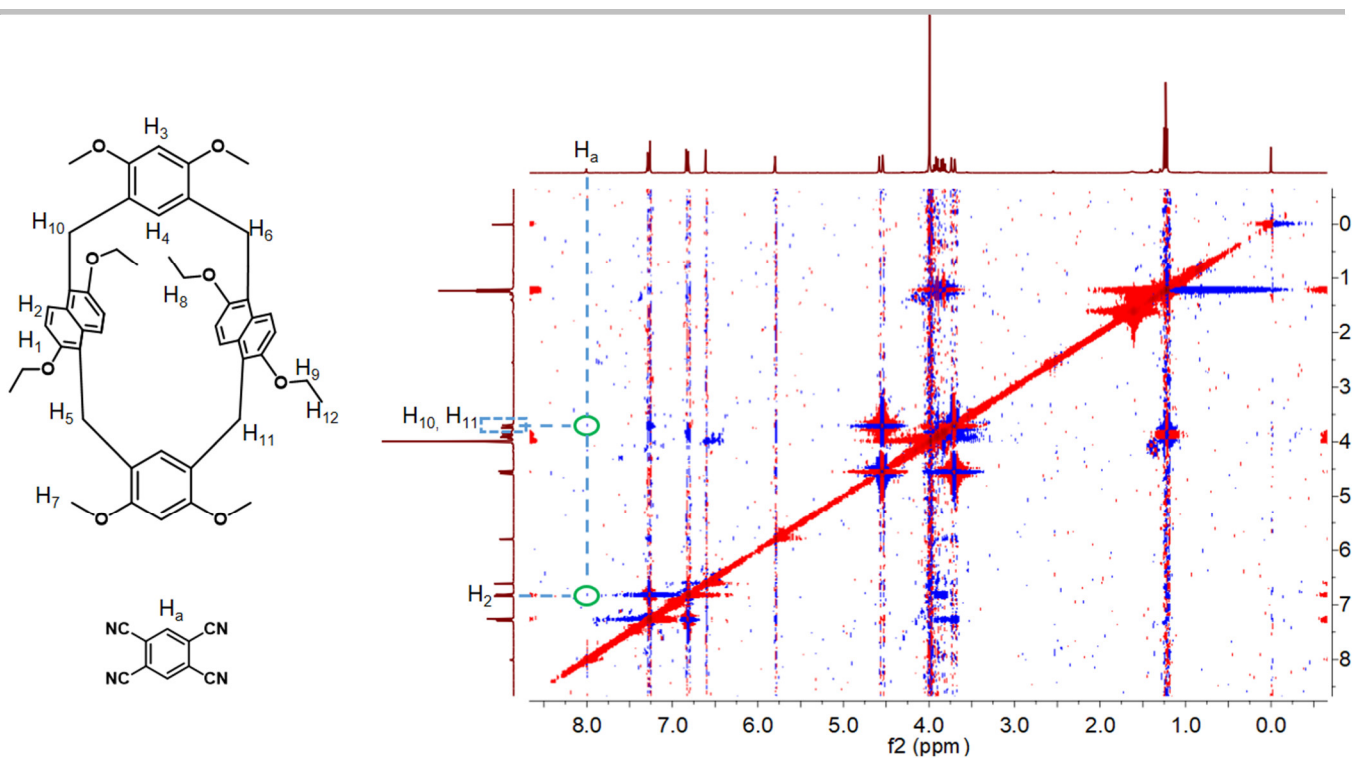

**Supplementary Figure 18.** 2D NOSEY spectrum (500 MHz,  $\text{CDCl}_3$ , 298 K) of H (10.0 mM) with TCNB (10.0 mM).

#### 2.4. Non-covalent interaction analysis in single crystal structure of H-TCNB@ $\text{CH}_2\text{Cl}_2$

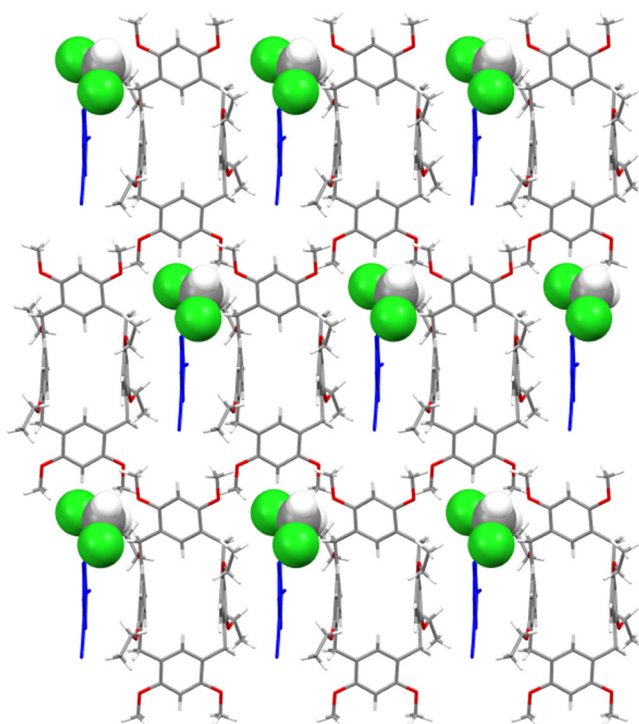

**Supplementary Figure 19.** Illustration of the packing model of H-TCNB@ $\text{CH}_2\text{Cl}_2$ .

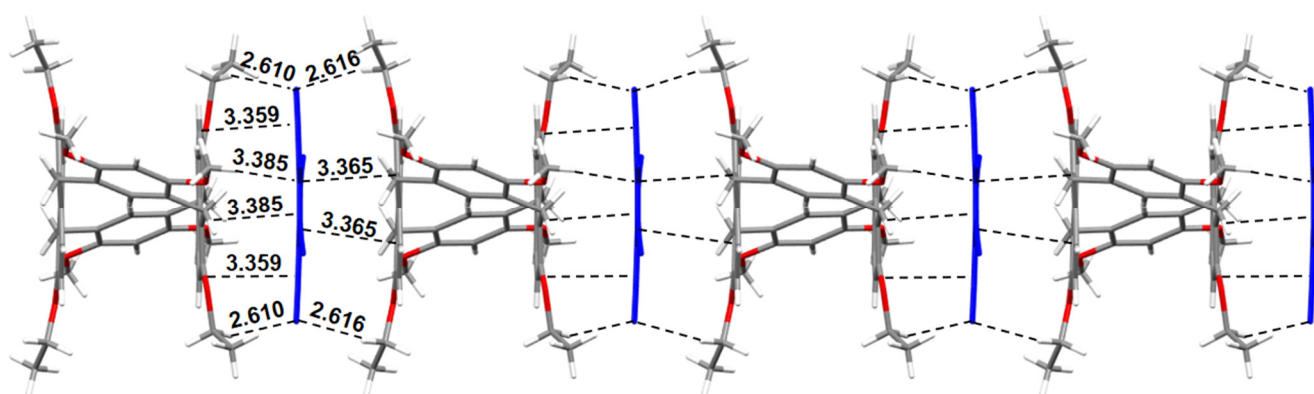

**Supplementary Figure 20.** The exo-wall  $\pi$ - $\pi$  interaction between H and TCNB in the co-crystal structures of H-TCNB@CH<sub>2</sub>Cl<sub>2</sub>. The CH<sub>2</sub>Cl<sub>2</sub> molecules are omitted for clarity.

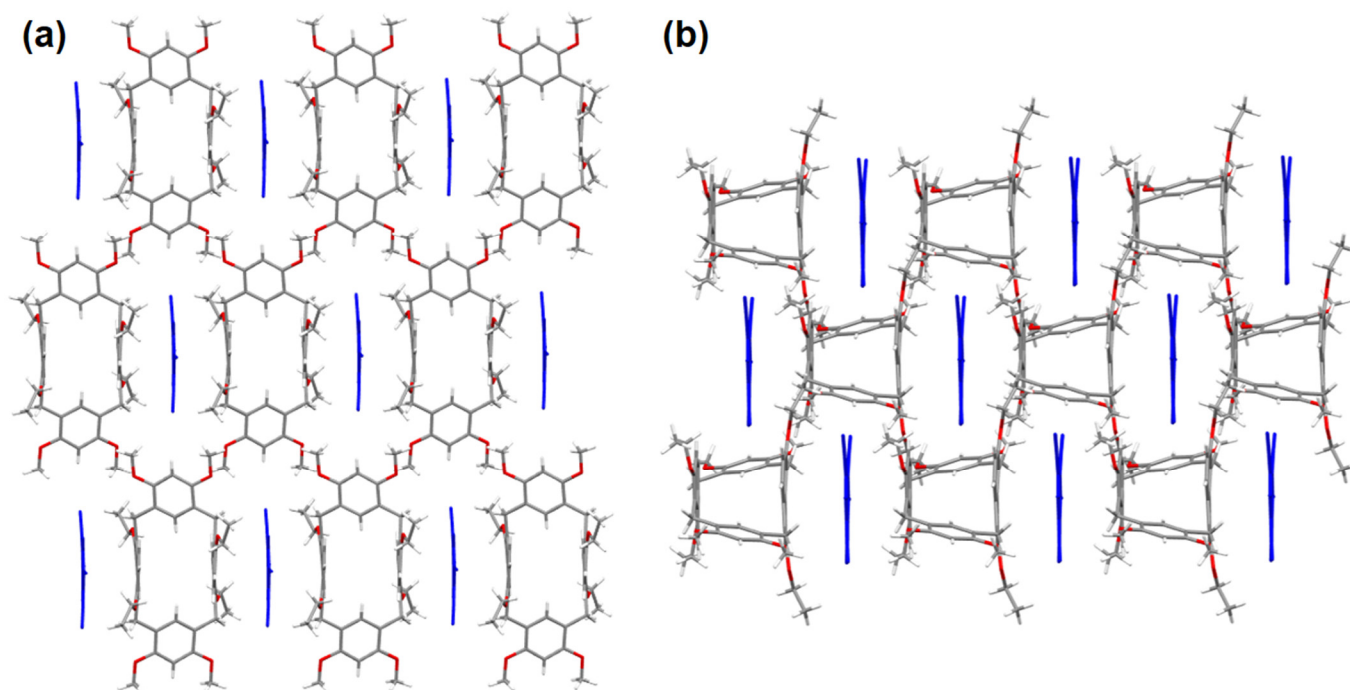

**Supplementary Figure 21.** Illustration of the packing model of H-TCNB@CH<sub>2</sub>Cl<sub>2</sub>. (a) Side view, (b) Top view. The CH<sub>2</sub>Cl<sub>2</sub> molecules are omitted for clarity.

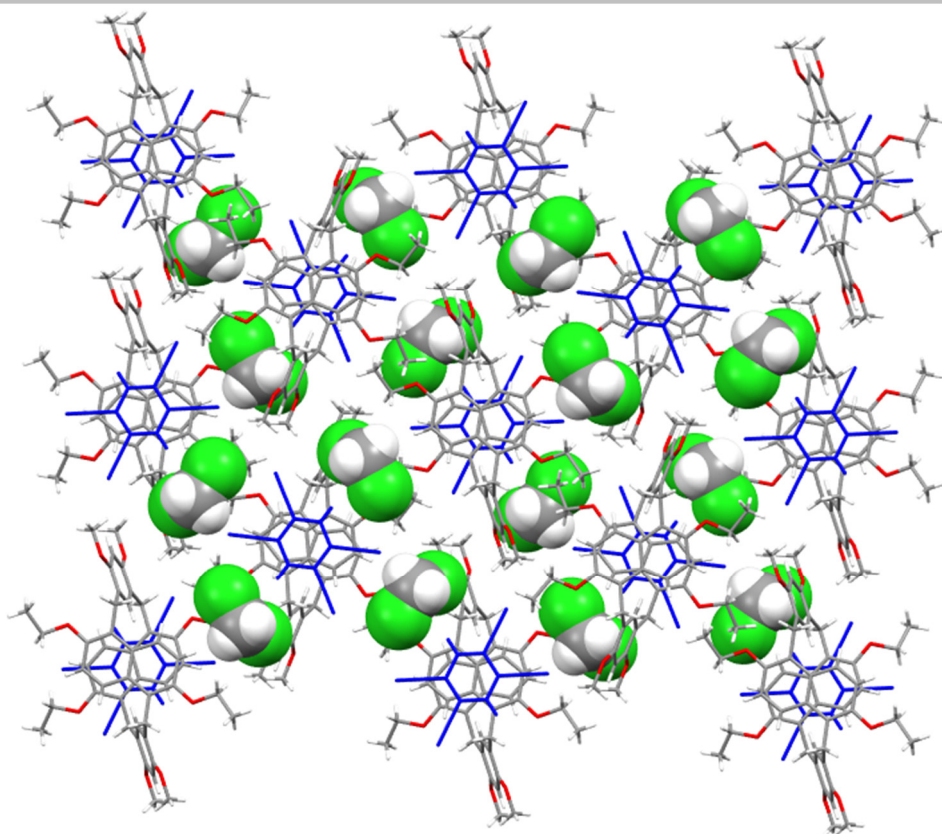

**Supplementary Figure 22.** Illustration of the packing model of H-TCNB@CH<sub>2</sub>Cl<sub>2</sub> along *a*-axis.

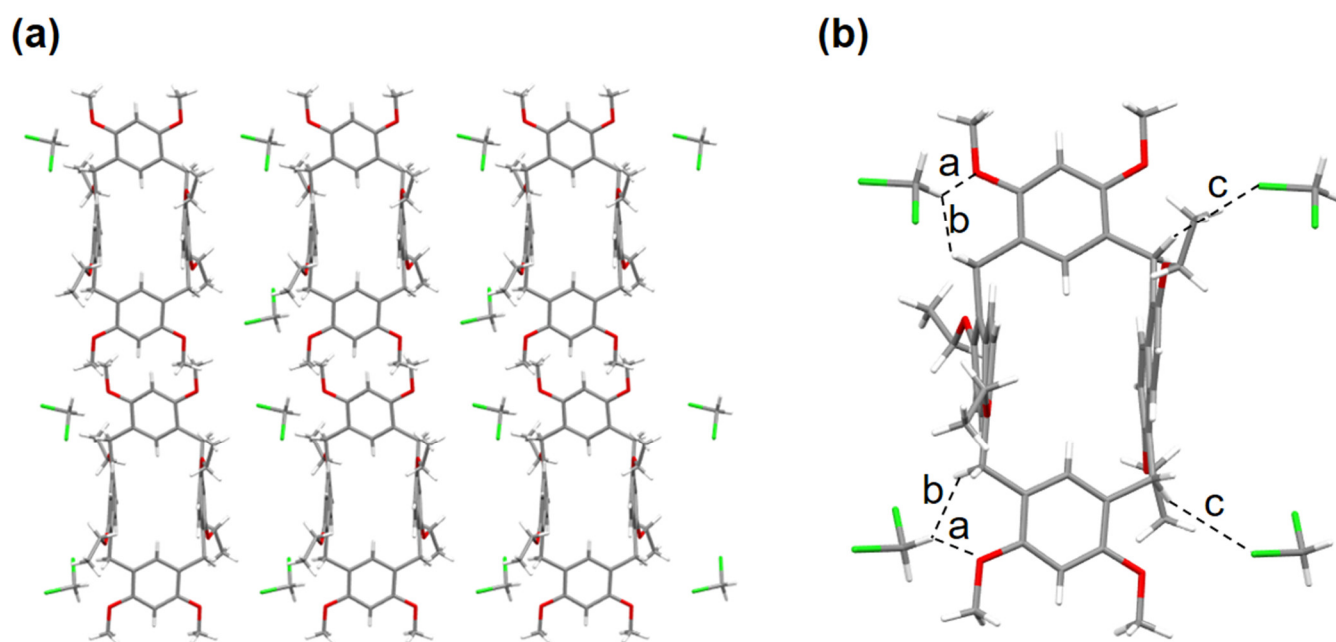

**Supplementary Figure 23.** Illustration of the (a) packing model of H-TCNB@CH<sub>2</sub>Cl<sub>2</sub> and (b) C-H...O and C-H...Cl interactions between CH<sub>2</sub>Cl<sub>2</sub> and H. The TCNB molecules are omitted for clarity. C-H...O distances: *a* = 2.419 Å, *b* = 2.343 Å. C-H...Cl distance: *c* = 2.936 Å.

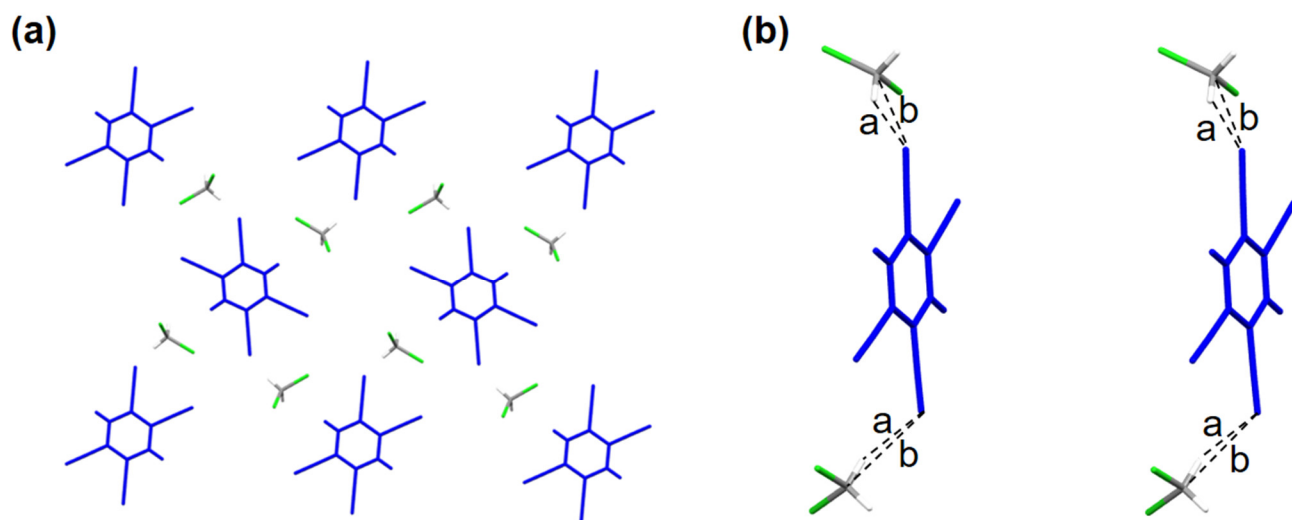

**Supplementary Figure 24.** Illustration of the (a) packing model of H-TCNB@CH<sub>2</sub>Cl<sub>2</sub> and (b) C-H...N interactions between CH<sub>2</sub>Cl<sub>2</sub> and TCNB. The H molecules are omitted for clarity. C-H...N distances: a = 2.342 Å, b = 3.218 Å.

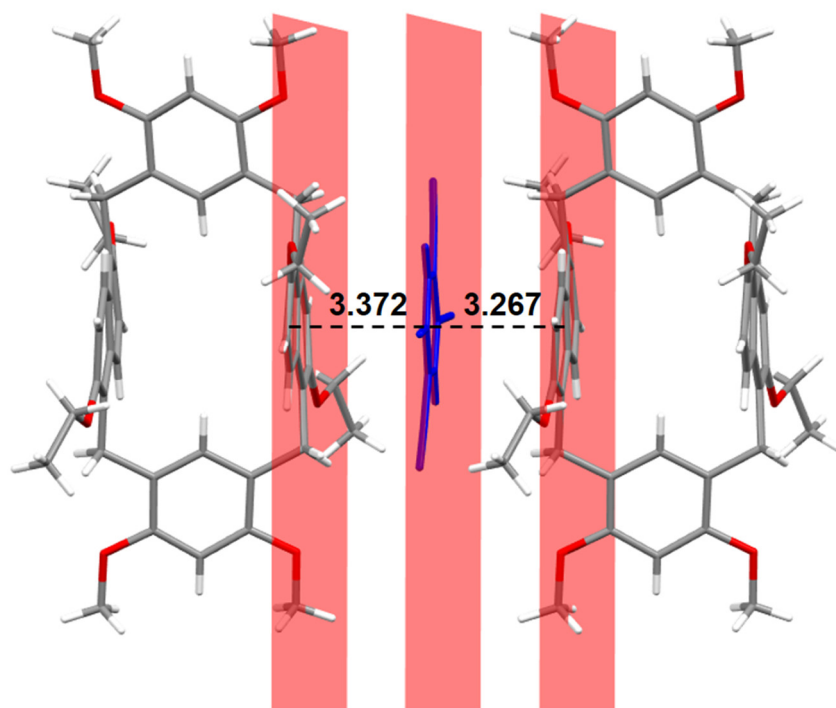

**Supplementary Figure 25.** The exo-wall  $\pi$ - $\pi$  interaction between H and TCNB in the co-crystal structures of H-TCNB@CH<sub>2</sub>Cl<sub>2</sub>. The CH<sub>2</sub>Cl<sub>2</sub> molecules are omitted for clarity.  $\pi$ - $\pi$  distances: 3.372 Å and 3.267 Å.

## 2.5. Characterization of H-TCNB $\alpha$

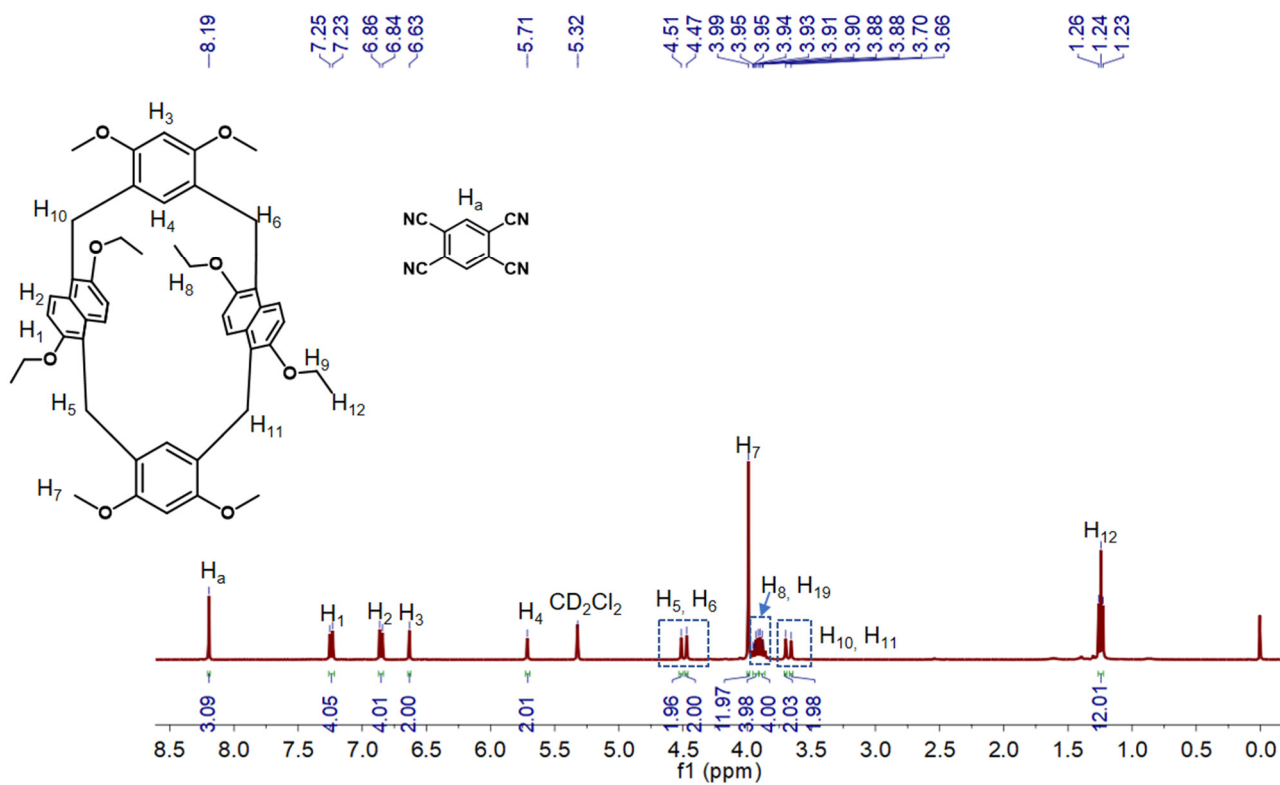

Supplementary Figure 26. <sup>1</sup>H NMR spectrum (500 MHz, CD<sub>2</sub>Cl<sub>2</sub>, 293 K) of H-TCNB $\alpha$ .

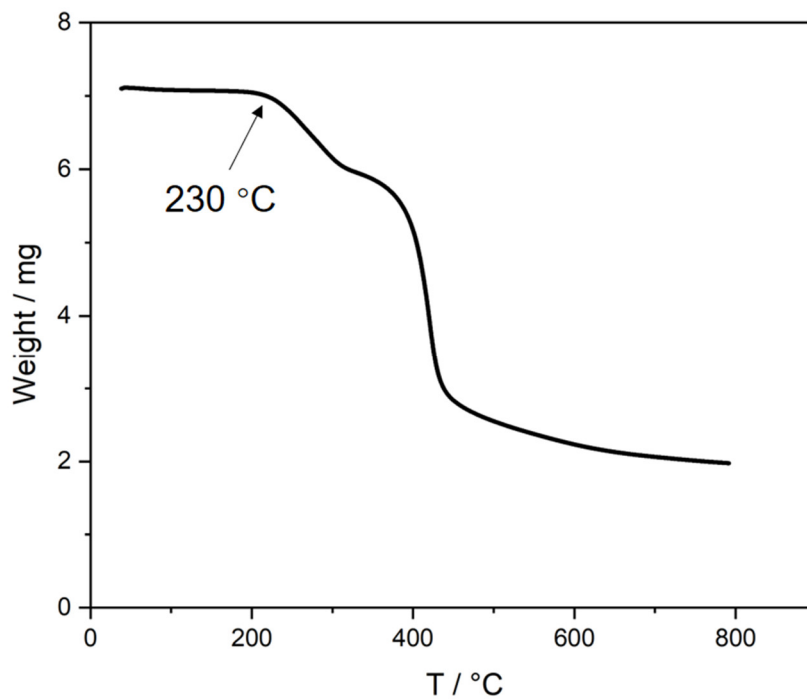

Supplementary Figure 27. Thermogravimetric analysis of H-TCNB $\alpha$ .

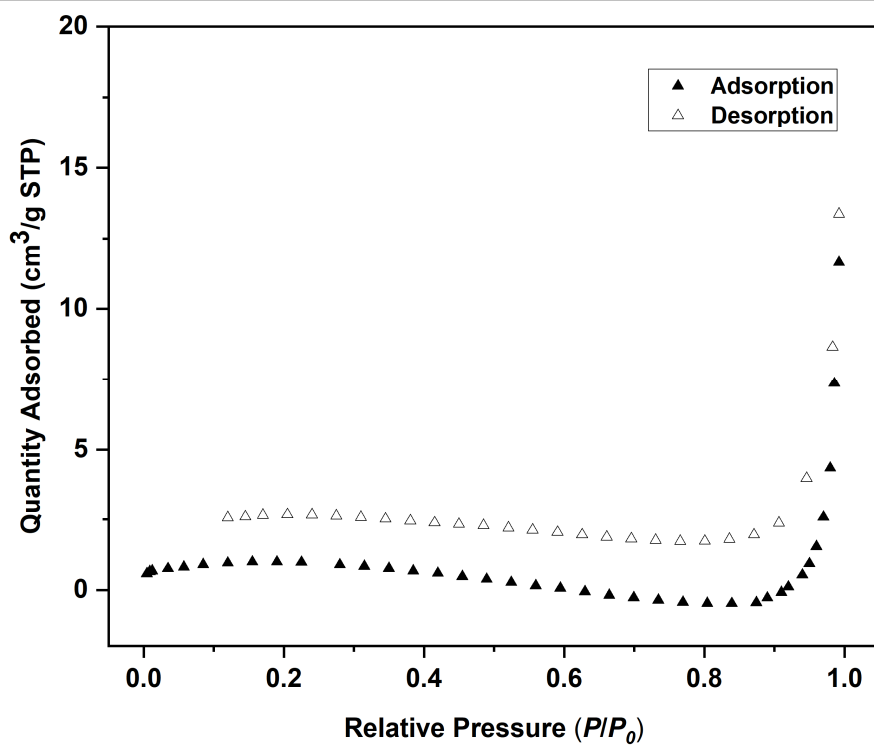

**Supplementary Figure 28.**  $\text{N}_2$  adsorption-desorption isotherm of H-TCNB $\alpha$ . The BET surface area value is  $0.970 \text{ m}^2/\text{g}$ . Adsorption, closed symbols; desorption, open symbols.

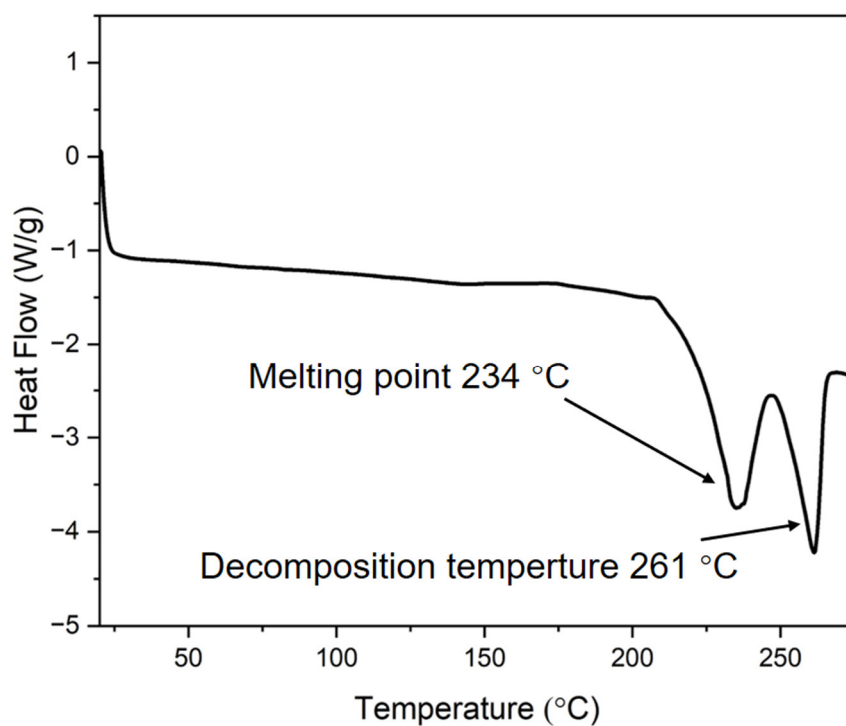

**Supplementary Figure 29.** DSC plot of H-TCNB $\alpha$ .

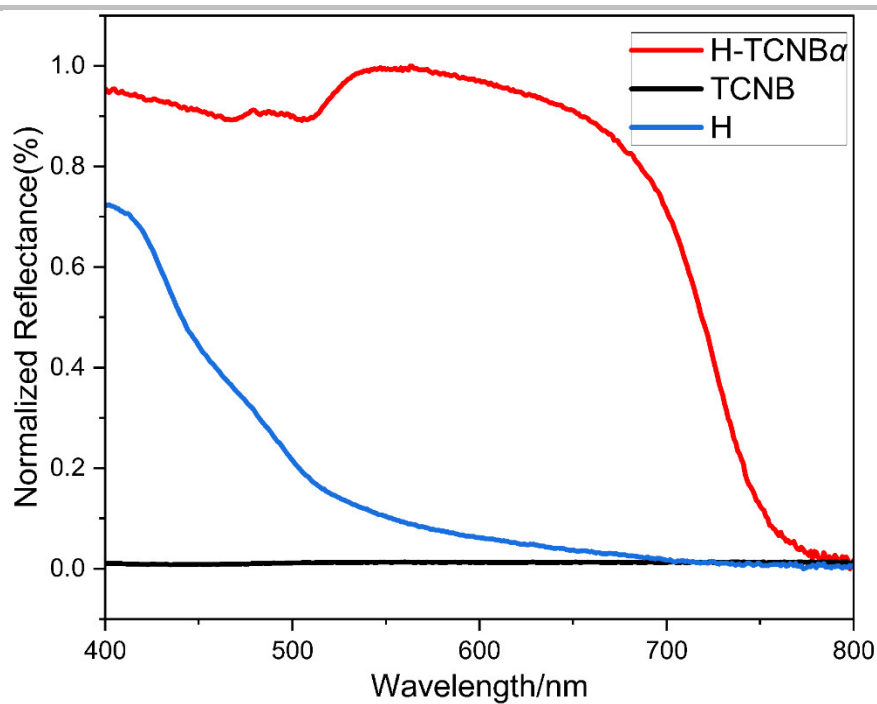

**Supplementary Figure 30.** Diffuse reflectance spectra of H, TCNB and H-TCNB $\alpha$ .

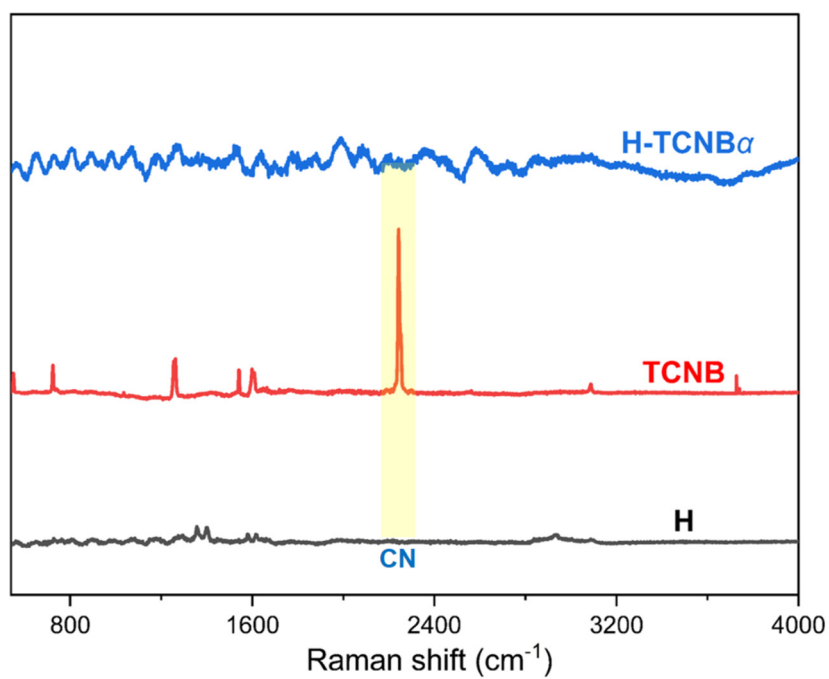

**Supplementary Figure 31.** Raman spectra of H, TCNB, H-TCNB $\alpha$ .

## 2.6. Single-component adsorption experiments

$^1\text{H}$  NMR experiments were performed by dissolving H-TCNB $\alpha$  after adsorption of single-component Bz/Cy vapor in  $\text{CD}_2\text{Cl}_2$ . TGA profiles were recorded using H-TCNB $\alpha$  after adsorption of single-component Bz/Cy vapor.<sup>1</sup>

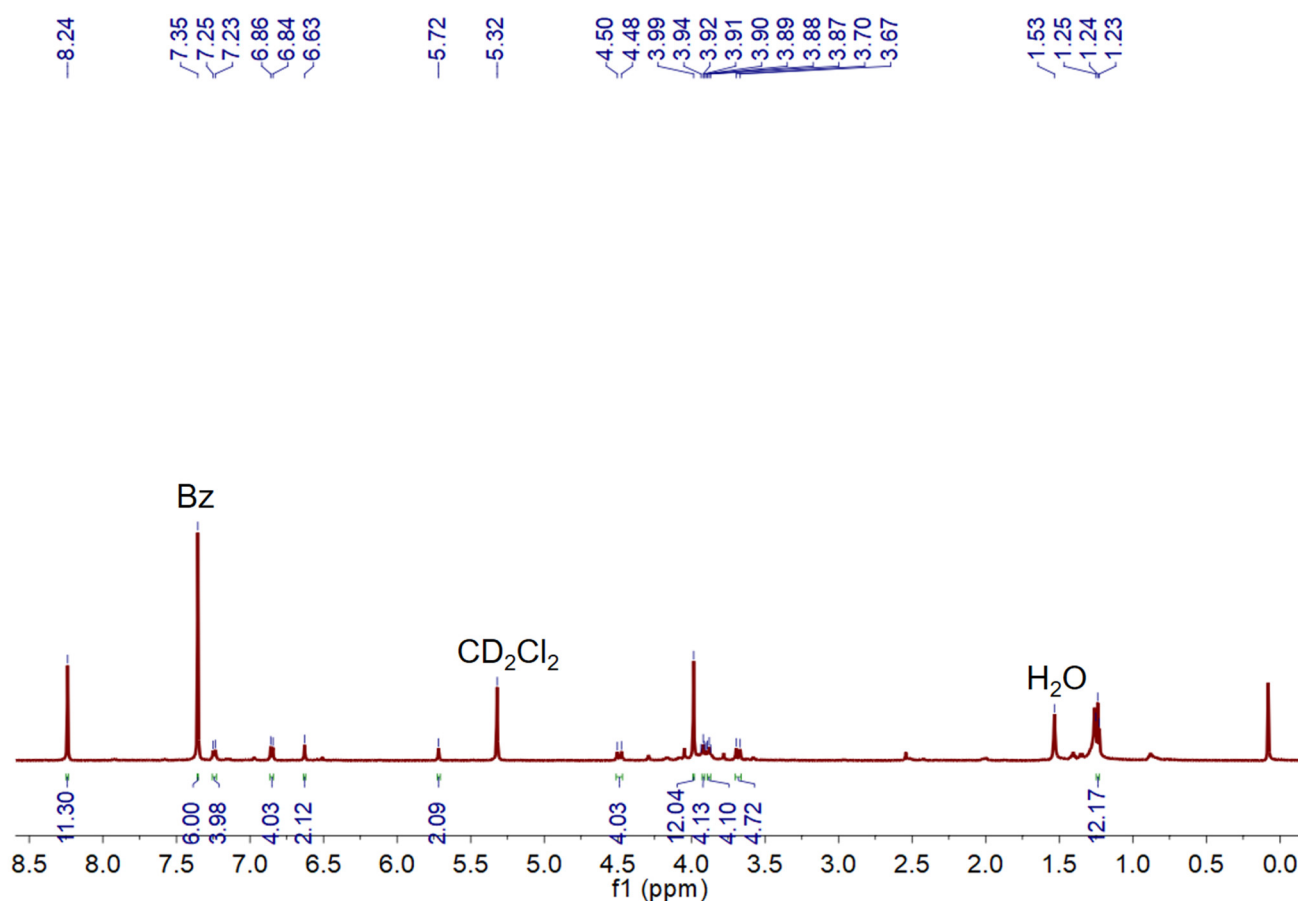

**Supplementary Figure 32.**  $^1\text{H}$  NMR spectrum (500 MHz,  $\text{CD}_2\text{Cl}_2$ , 293 K) of H-TCNB $\alpha$  after adsorption of Bz vapor for 24 h.



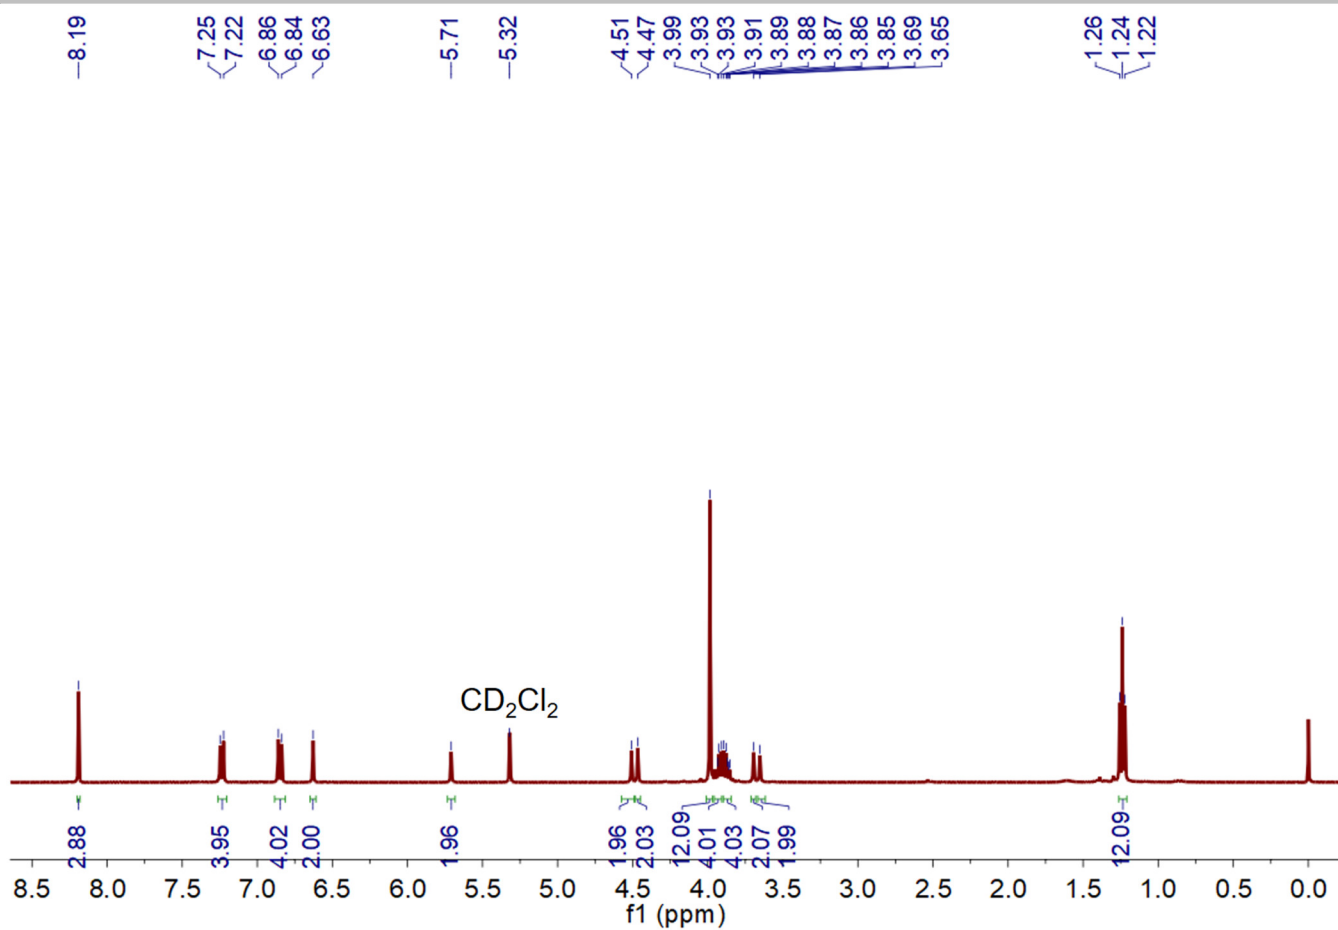

**Supplementary Figure 33.** <sup>1</sup>H NMR spectrum (500 MHz, CD<sub>2</sub>Cl<sub>2</sub>, 293 K) of H-TCNB $\alpha$  after adsorption of Cy vapor for 24 h.

<sup>1</sup>H NMR experiments were performed by dissolving H-TCNB $\alpha$  after adsorption of single-component Tol/Py vapor in CD<sub>2</sub>Cl<sub>2</sub>. TGA profiles were recorded using H-TCNB $\alpha$  after adsorption of single-component Tol/Py vapor.

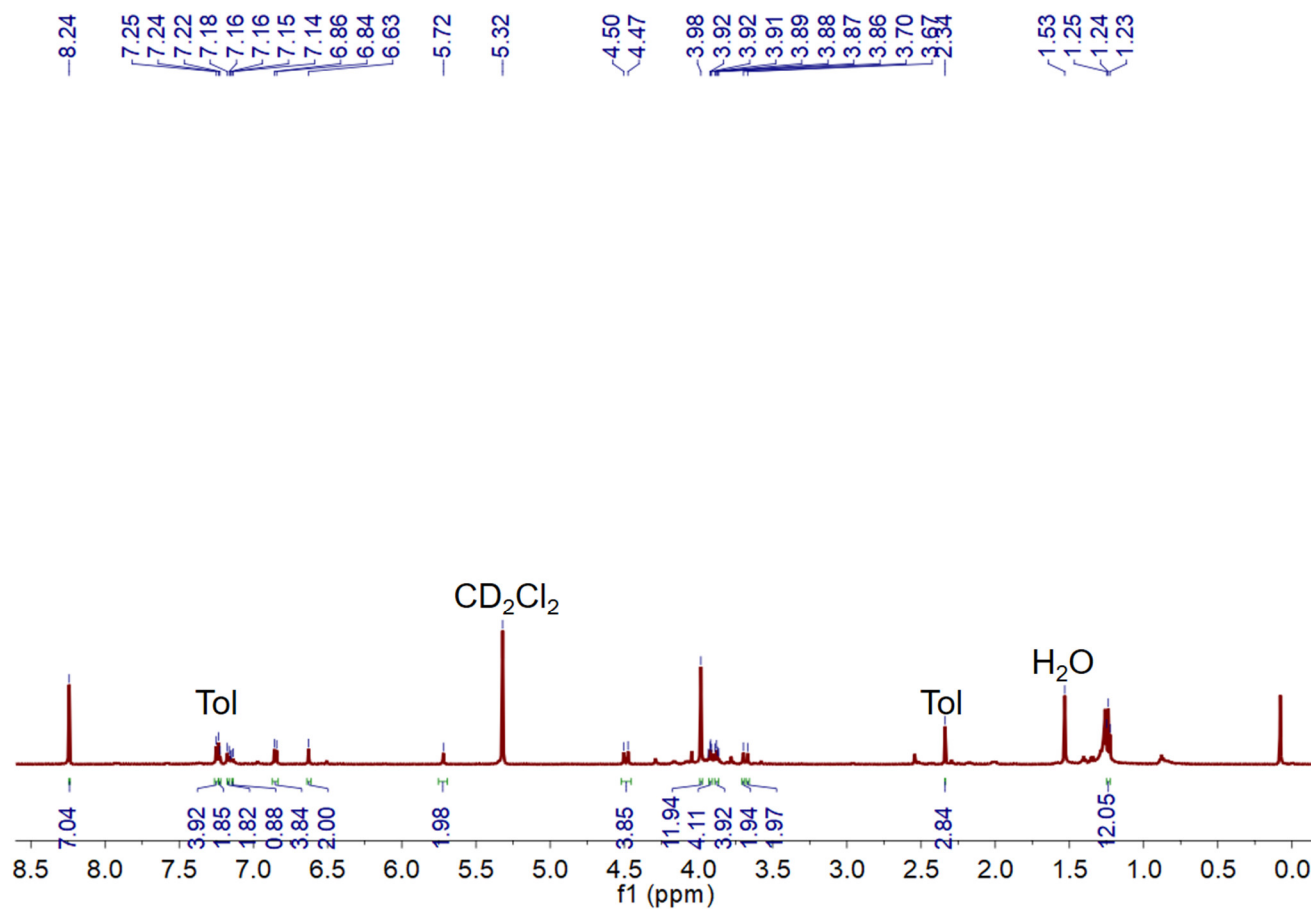

**Supplementary Figure 34.** <sup>1</sup>H NMR spectrum (500 MHz, CD<sub>2</sub>Cl<sub>2</sub>, 293 K) of H-TCNB $\alpha$  after adsorption of Tol vapor for 24 h.

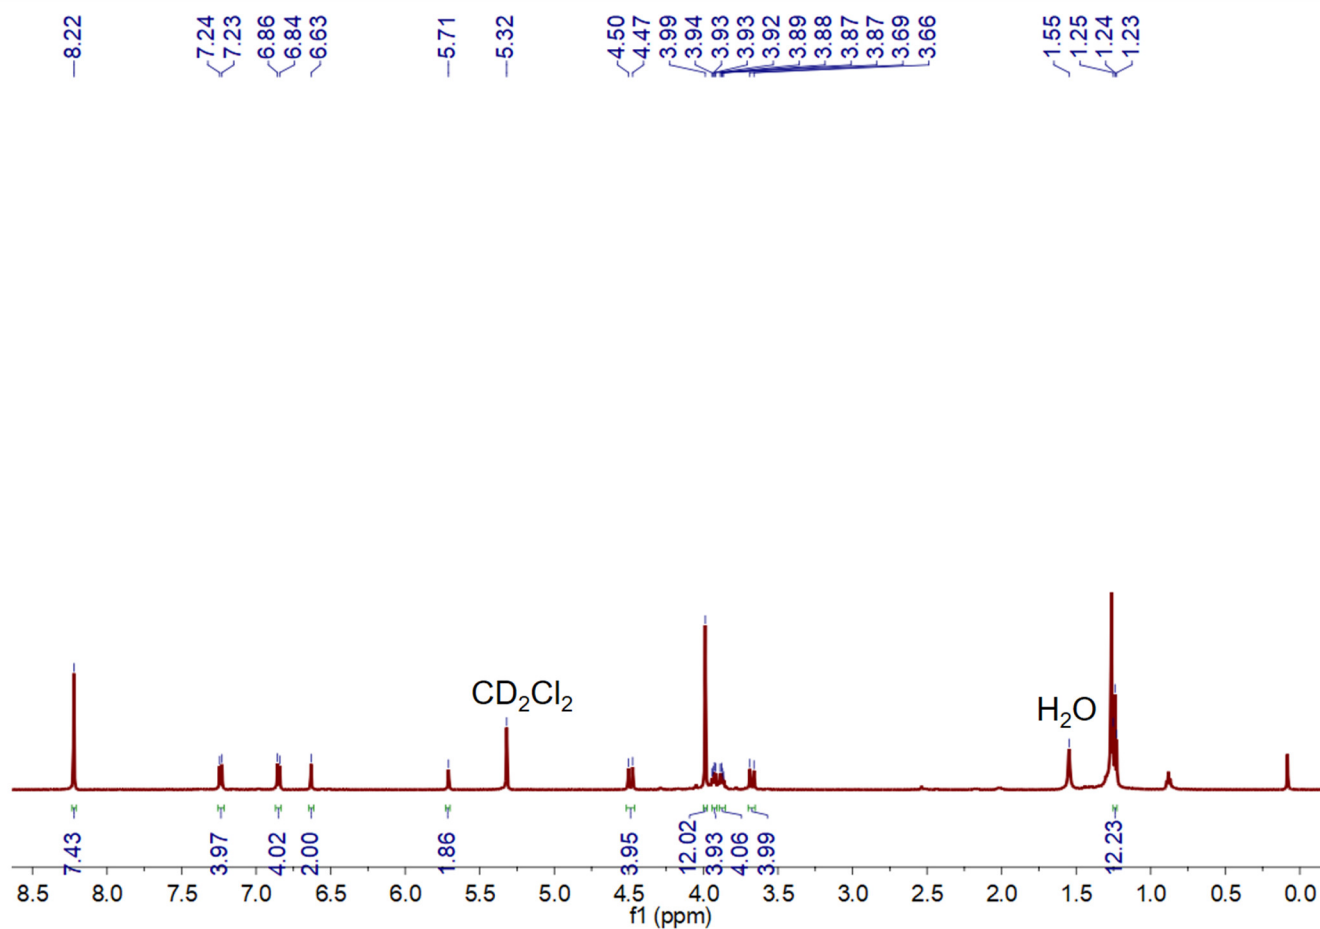

**Supplementary Figure 35.** <sup>1</sup>H NMR spectrum (500 MHz, CD<sub>2</sub>Cl<sub>2</sub>, 293 K) of H-TCNB $\alpha$  after adsorption of Py vapor for 24 h.

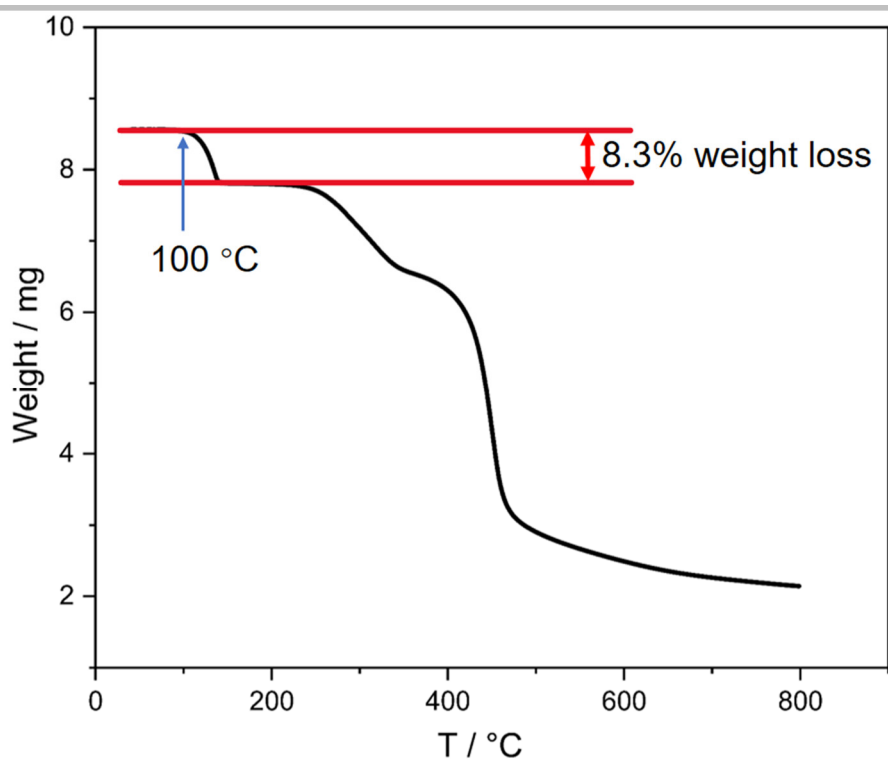

**Supplementary Figure 36.** Thermogravimetric analysis of H-TCNB $\alpha$  after adsorption of Bz vapor for 24 h. The weight loss below 200 °C can be calculated as one Bz molecule per H-TCNB molecule.

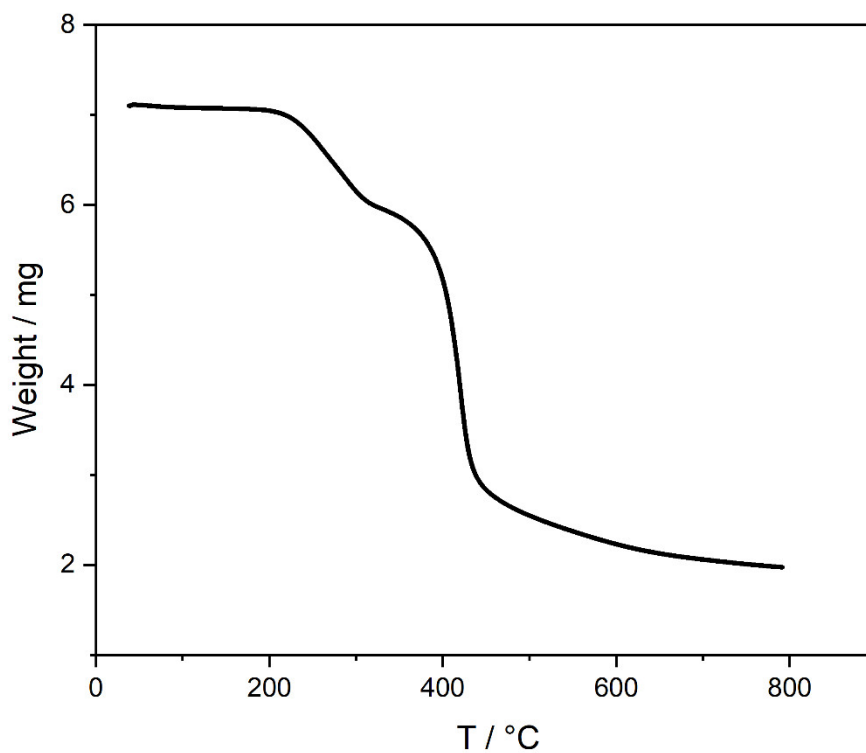

**Supplementary Figure 37.** Thermogravimetric analysis of H-TCNB $\alpha$  after adsorption of Cy vapor for 24 h.

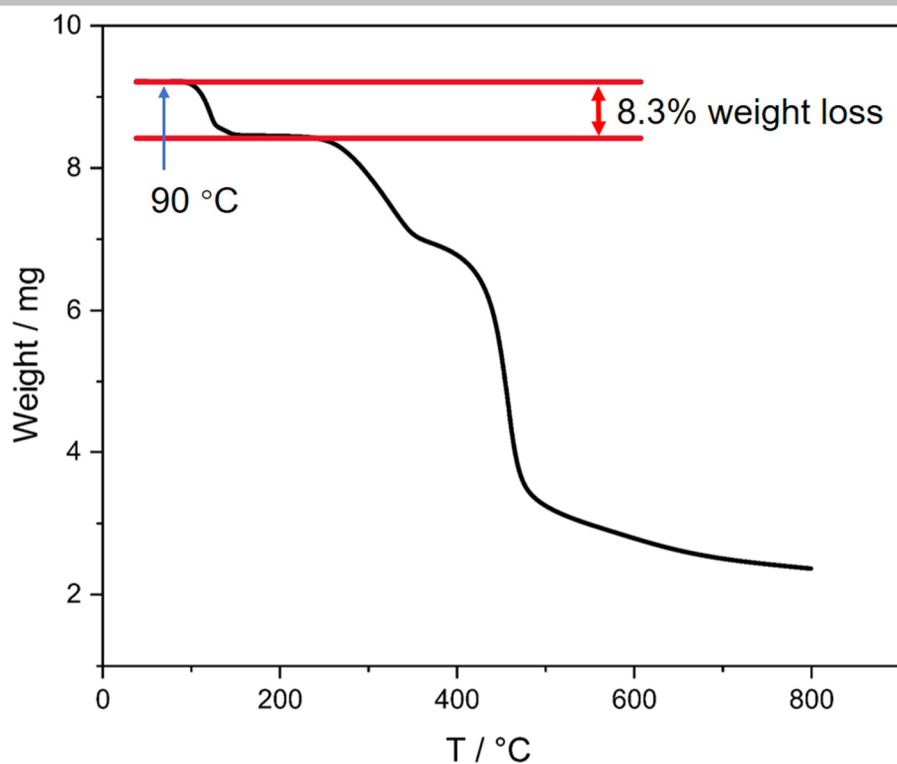

**Supplementary Figure 38.** Thermogravimetric analysis of H-TCNB $\alpha$  after adsorption of Tol vapor for 24 h. The weight loss below 150 °C can be calculated as 0.86 Tol molecule per H-TCNB molecule.

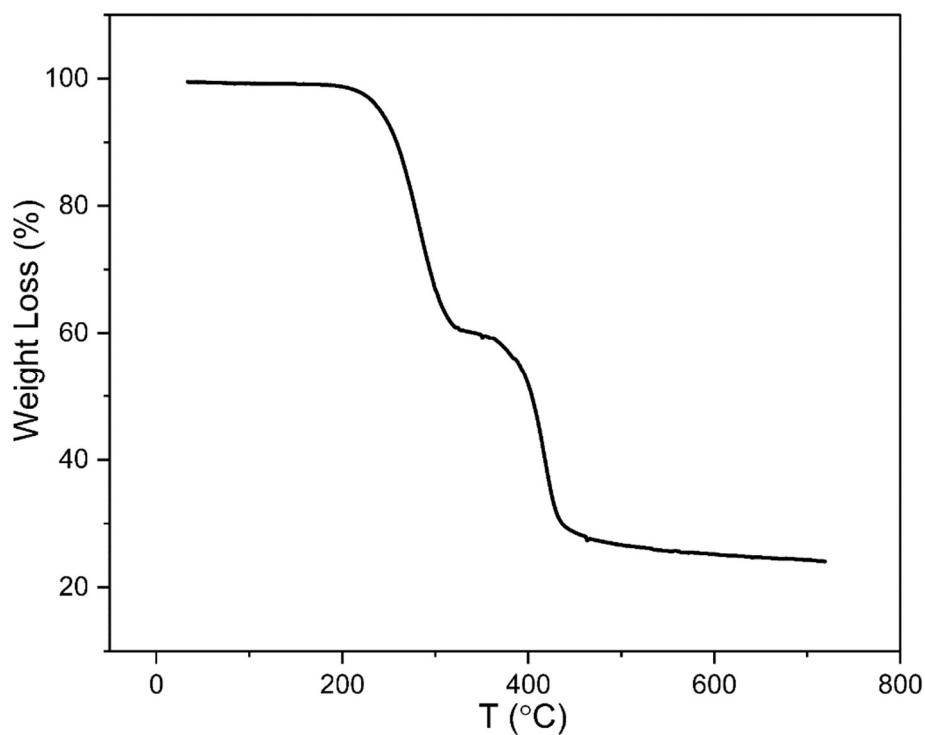

**Supplementary Figure 39.** Thermogravimetric analysis of H-TCNB $\alpha$  after adsorption of Py vapor for 24 h.

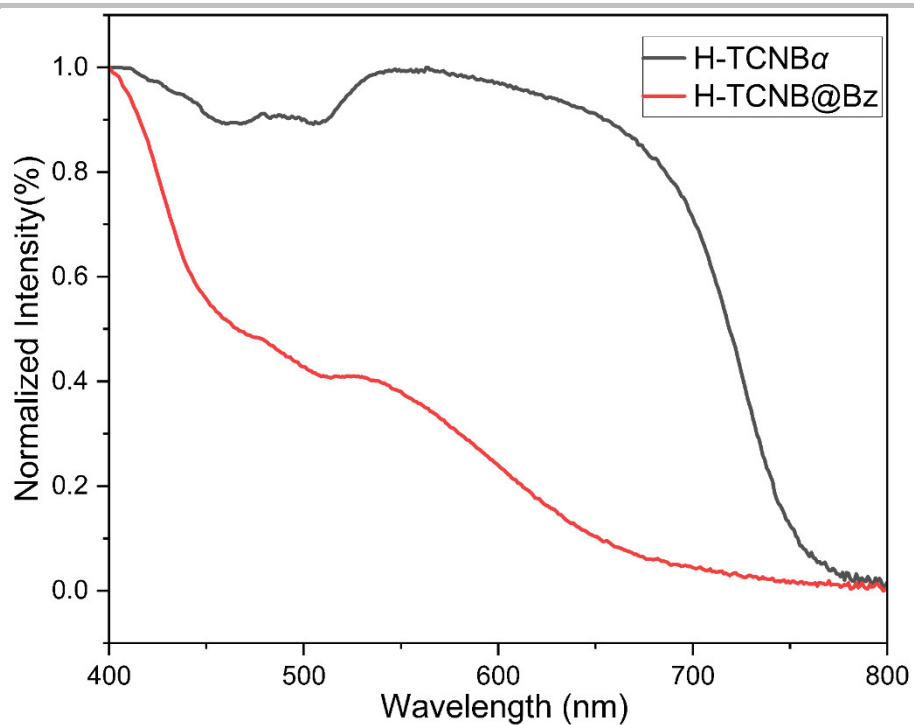

**Supplementary Figure 40.** Normalized diffuse reflectance spectra of H-TCNB $\alpha$  upon adsorption of Bz.

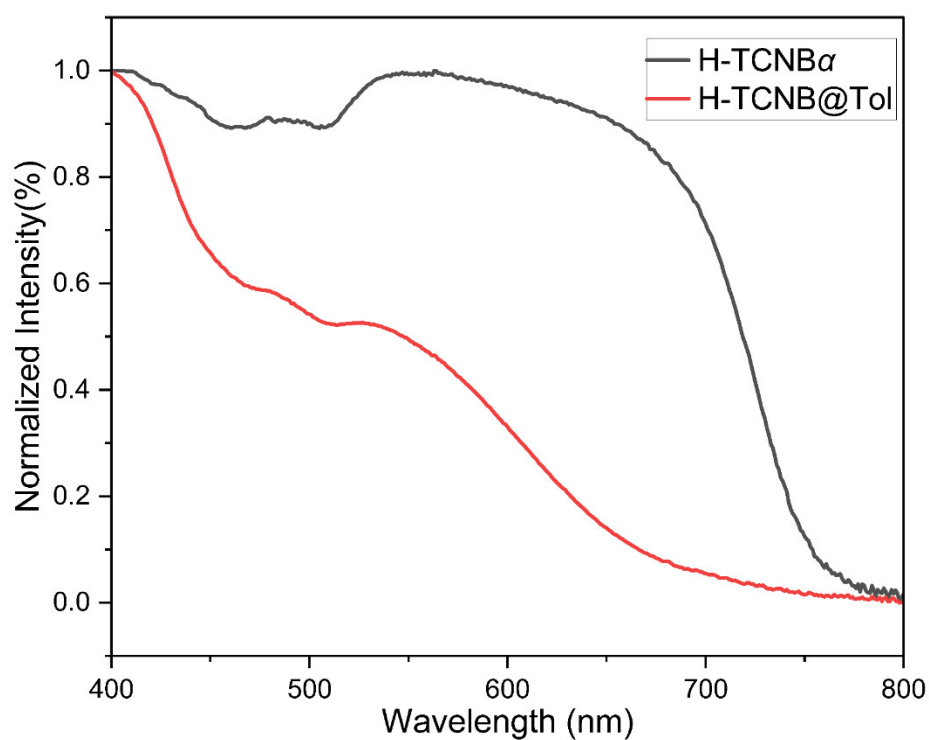

**Supplementary Figure 41.** Normalized diffuse reflectance spectra of H-TCNB $\alpha$  upon adsorption of Tol.

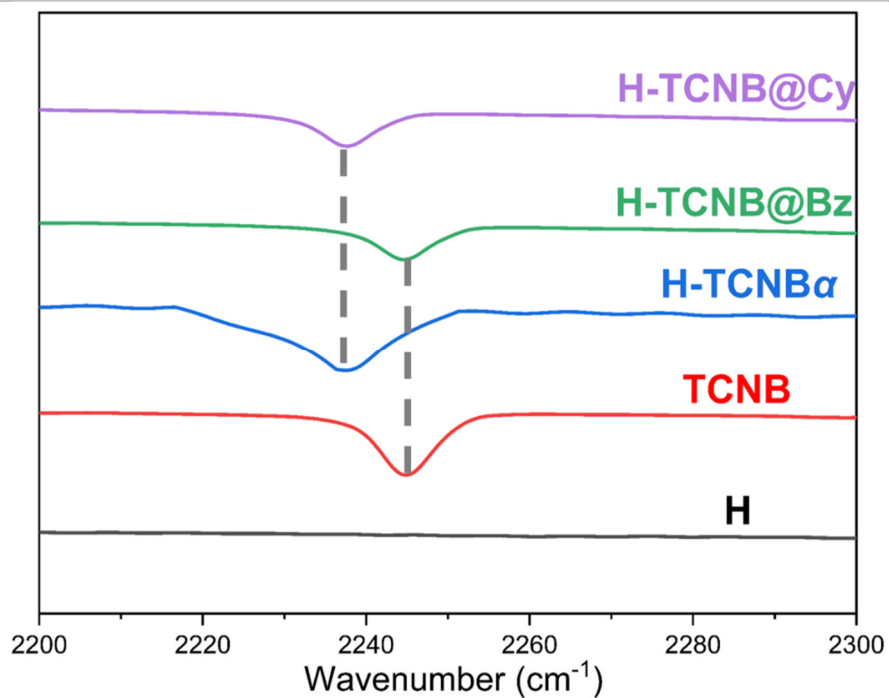

**Supplementary Figure 42.** Partial FT-IR spectra of H, TCNB, H-TCNB $\alpha$ , H-TCNB@Bz and H-TCNB@Cy.

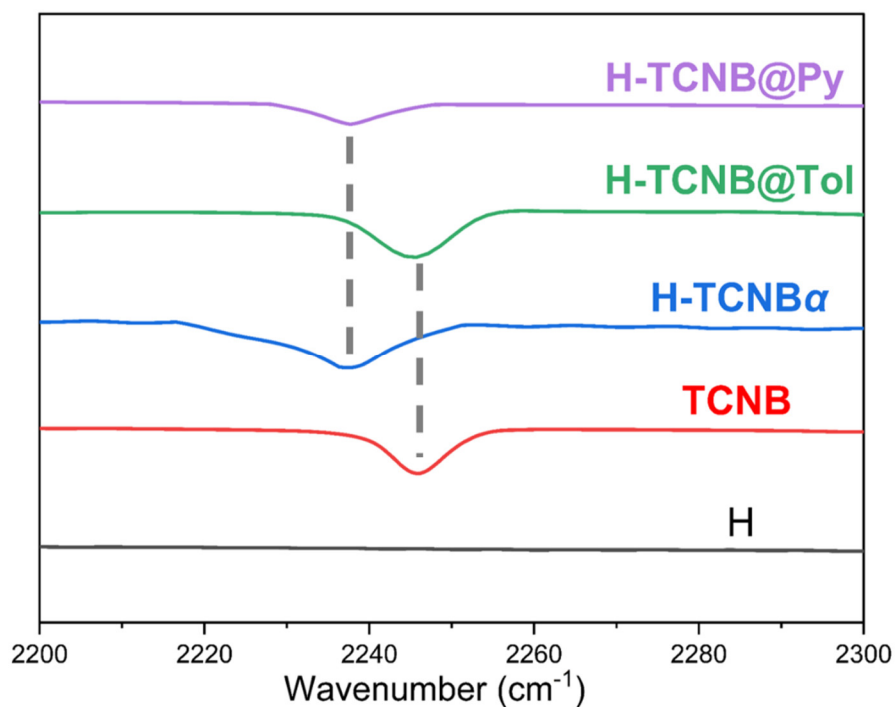

**Supplementary Figure 43.** Partial FT-IR spectra of H, TCNB, H-TCNB $\alpha$ , H-TCNB@Tol and H-TCNB@Py.

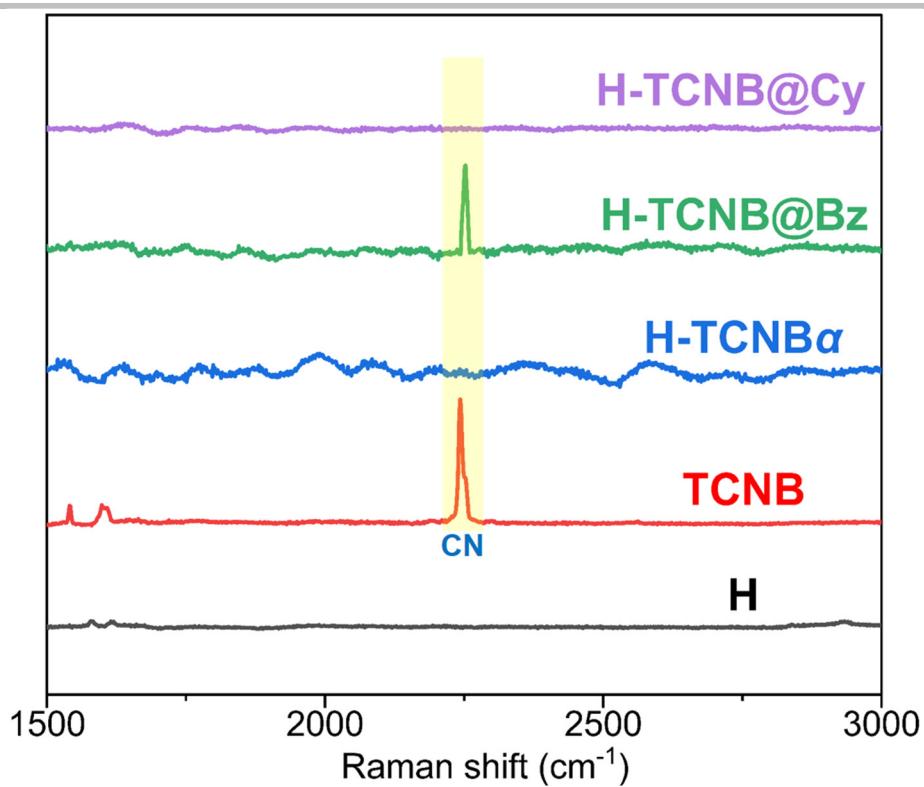

**Supplementary Figure 44.** Enlarged Raman spectra of H, TCNB, H-TCNB $\alpha$ , H-TCNB@Bz and H-TCNB@Cy.

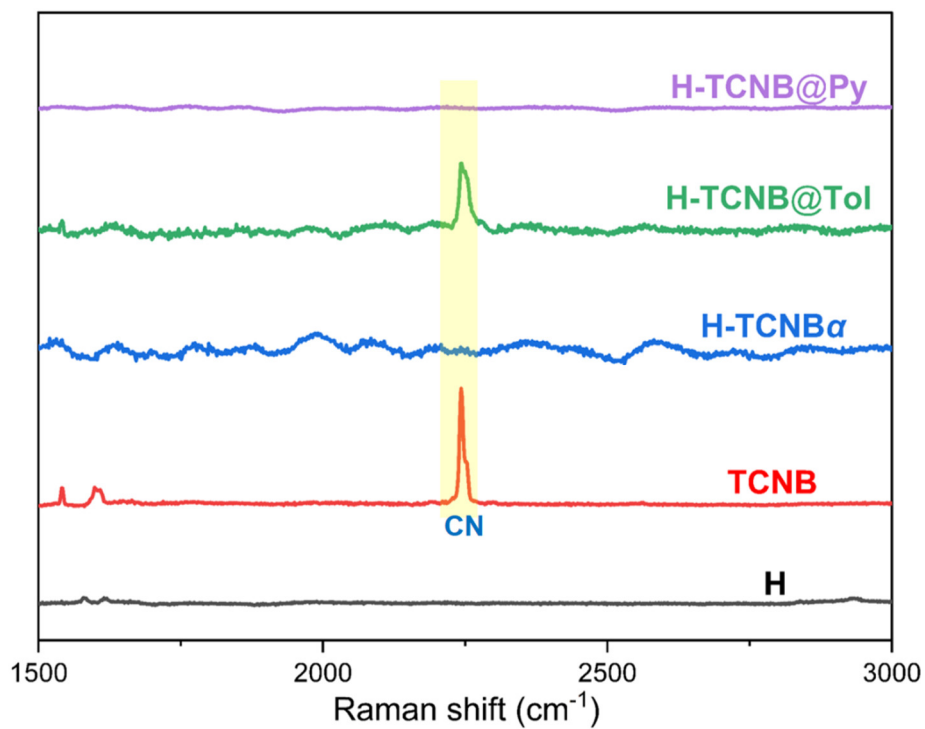

**Supplementary Figure 45.** Enlarged Raman spectra of H, TCNB, H-TCNB $\alpha$ , H-TCNB@Tol and H-TCNB@Py.



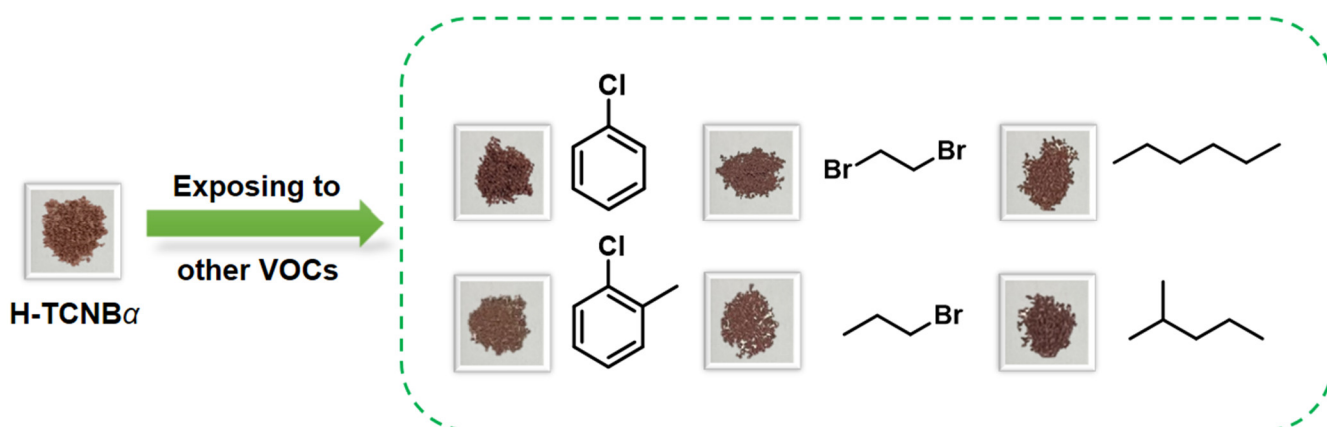

Supplementary Figure 46. The color of H-TCNB $\alpha$  after exposure to other VOCs.

## 2.7. Non-covalent interaction analysis in single crystal structure of H-TCNB@Bz

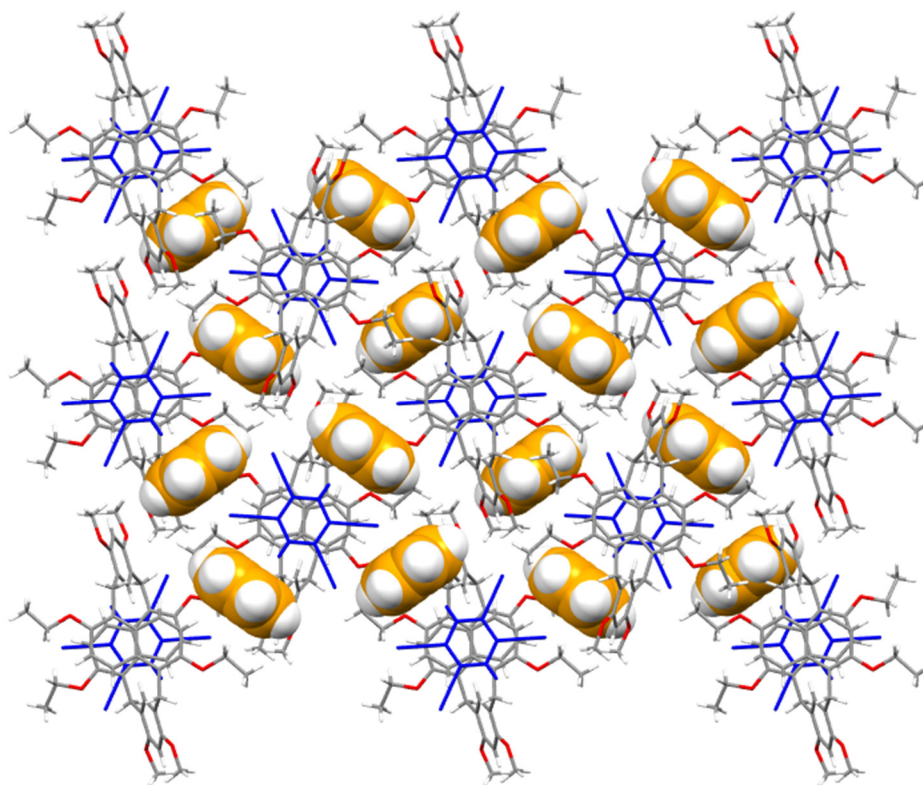

Supplementary Figure 47. Illustration of the packing model of H-TCNB@Bz.

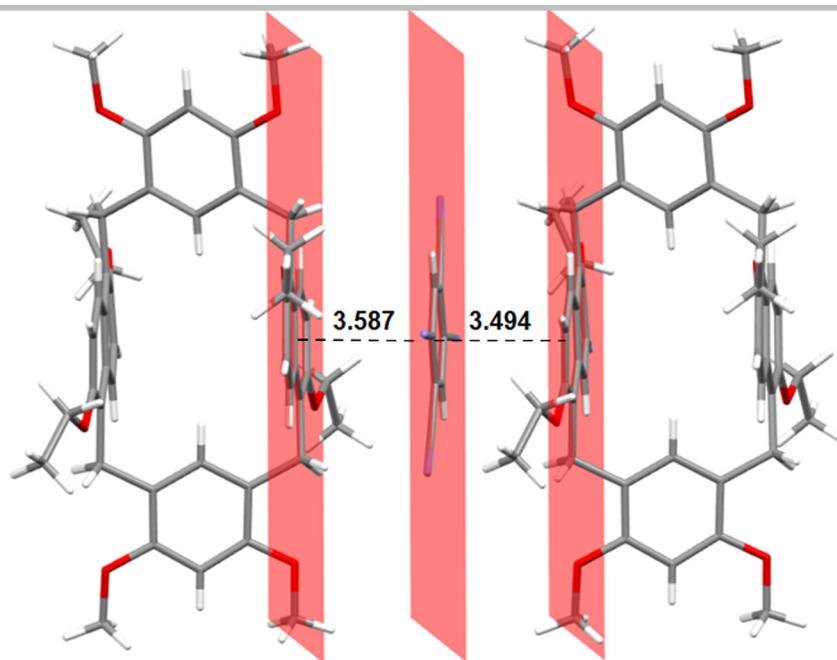

**Supplementary Figure 48.** The exo-wall  $\pi$ - $\pi$  interactions between H and TCNB in H-TCNB@Bz. The Bz molecules are omitted for clarity.  $\pi$ - $\pi$  distances: 3.587 Å and 3.494 Å.

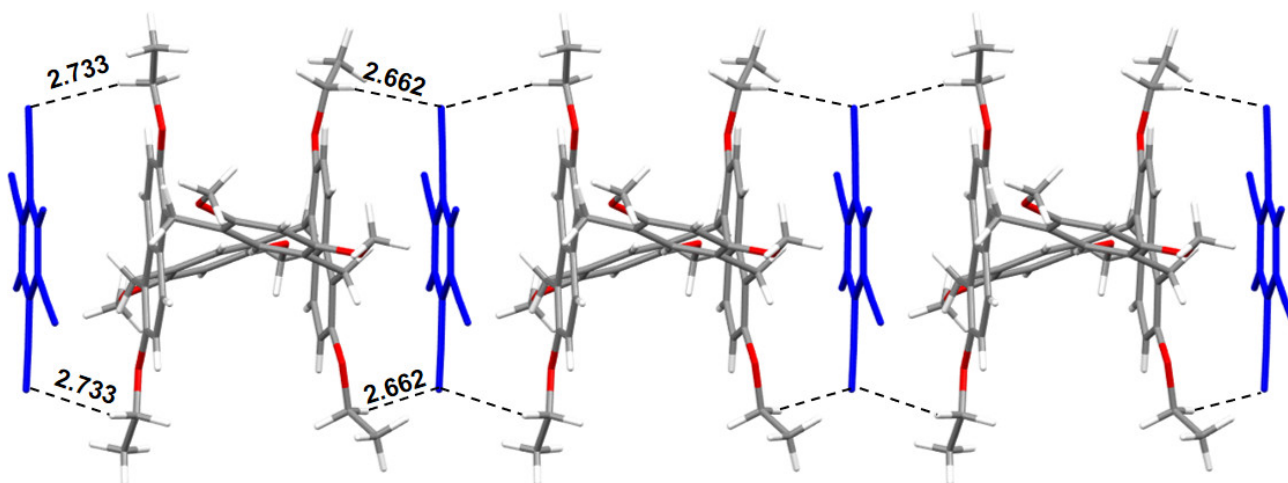

**Supplementary Figure 49.** The exo-wall C-H $\cdots$ N interaction between H and TCNB in H-TCNB@Bz. The Bz molecules are omitted for clarity. C-H $\cdots$ N distances: 2.733 Å and 2.662 Å.

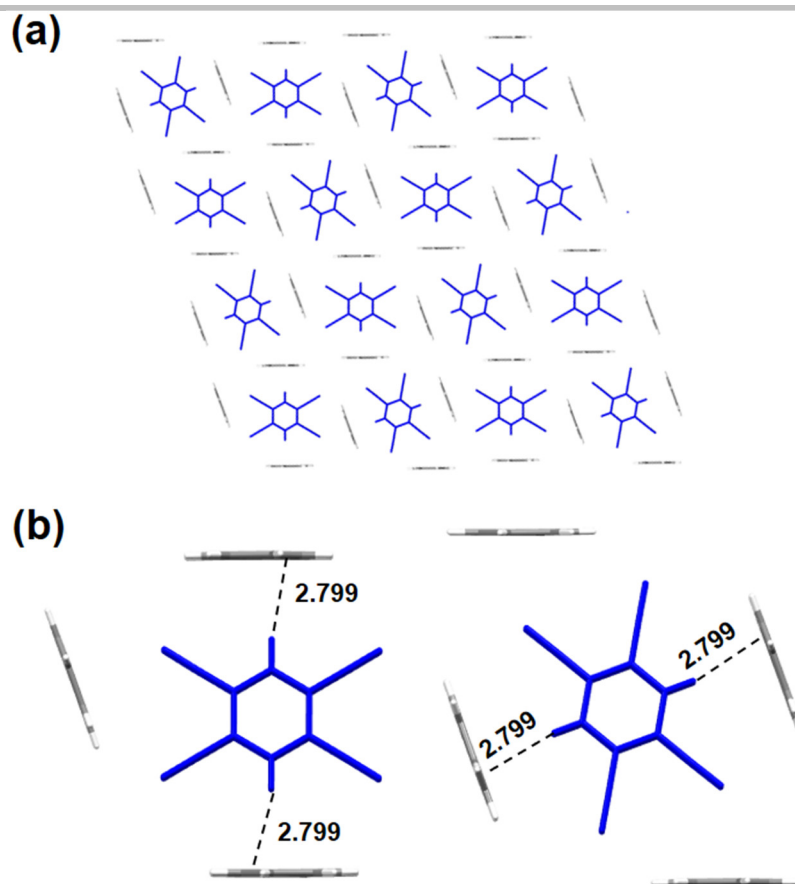

**Supplementary Figure 50.** Illustration of the (a) packing model of H-TCNB@Bz and (b) C-H $\cdots$  $\pi$  interaction between Bz and TCNB. The H molecules are omitted for clarity. C-H $\cdots$  $\pi$  distance: 2.799 Å.

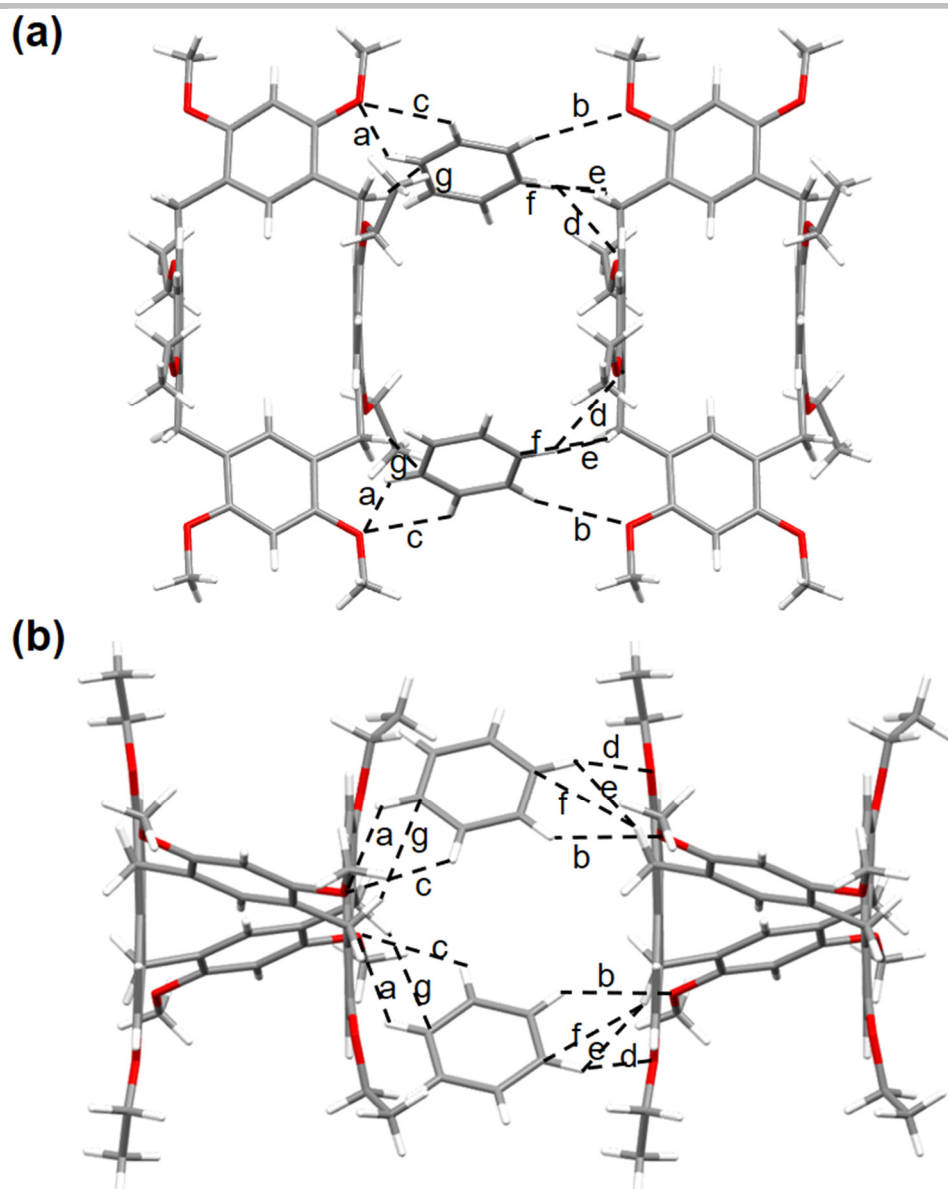

**Supplementary Figure 51.** Illustration of C-H $\cdots$ O and C-H $\cdots$  $\pi$  interactions between Bz and H. The TCNB molecules are omitted for clarity. C-H $\cdots$ O distances: a = 2.707 Å, b = 2.685 Å, c = 2.669 Å. C-H $\cdots$  $\pi$  distances: d = 2.685 Å, e = 2.234 Å, f = 2.800 Å, g = 2.804 Å.

## 2.8. Selectivity experiments of H-TCNB $\alpha$ for the mixture vapors of Bz and Cy

An open 5 mL vial containing 2 mg of H-TCNB $\alpha$  adsorbent was placed in a sealed 20 mL vial containing 1 mL of a Bz/Cy mixture ( $v:v = 1:1$ ). Uptake in H-TCNB $\alpha$  was measured hour by hour by completely dissolving the crystals and measuring the ratio of Bz or Cy to H-TCNB by  $^1\text{H}$  NMR. The relative uptakes of Bz and Cy in H $\alpha$  were also measured by heating the crystals to release the adsorbed vapor and detecting the relative amounts of Bz and Cy in the released vapor using headspace gas chromatography.

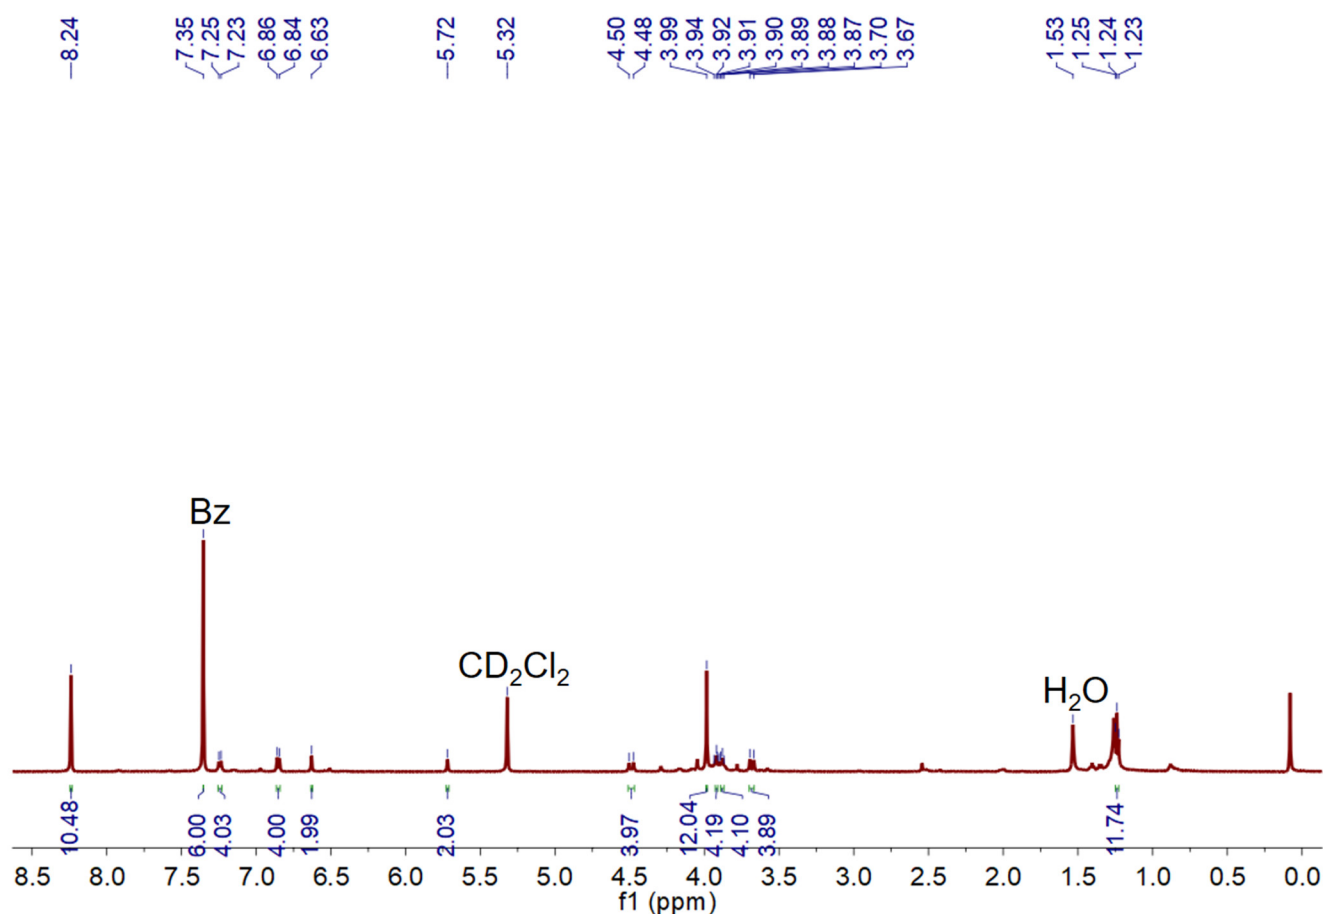

**Supplementary Figure 52.**  $^1\text{H}$  NMR spectrum (500 MHz,  $\text{CD}_2\text{Cl}_2$ , 293 K) of H-TCNB $\alpha$  after adsorption of a Bz/Cy mixture ( $v:v = 1:1$ ) vapor for 12 h.

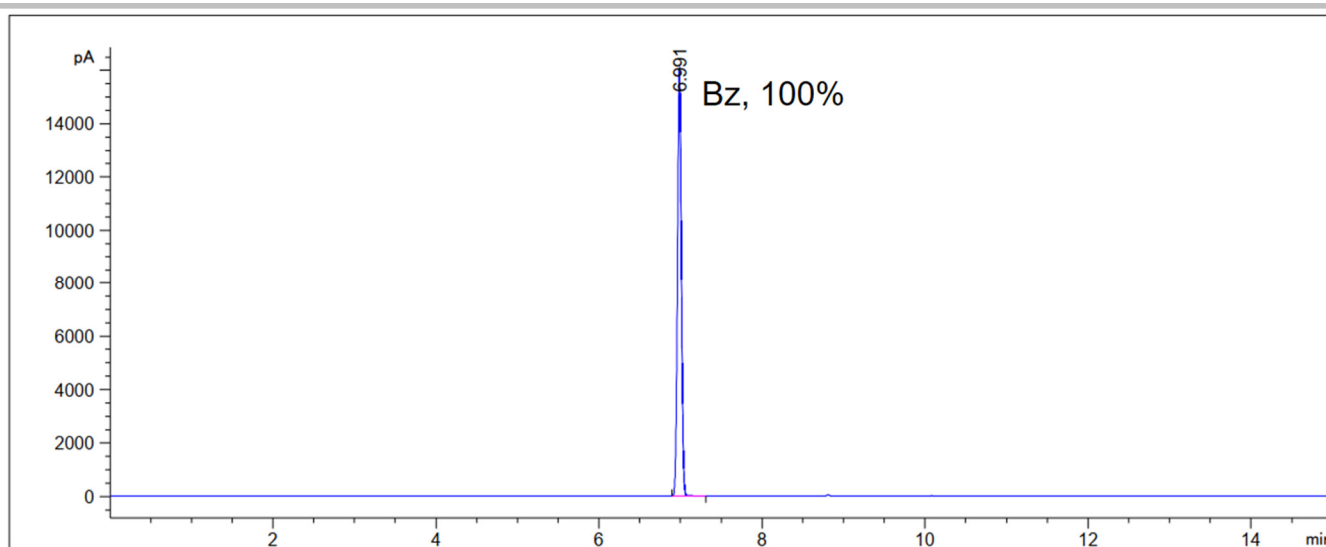

**Supplementary Figure 53.** Relative uptakes of Bz and Cy adsorbed in H-TCNB $\alpha$  for 24 h using head space gas chromatography.

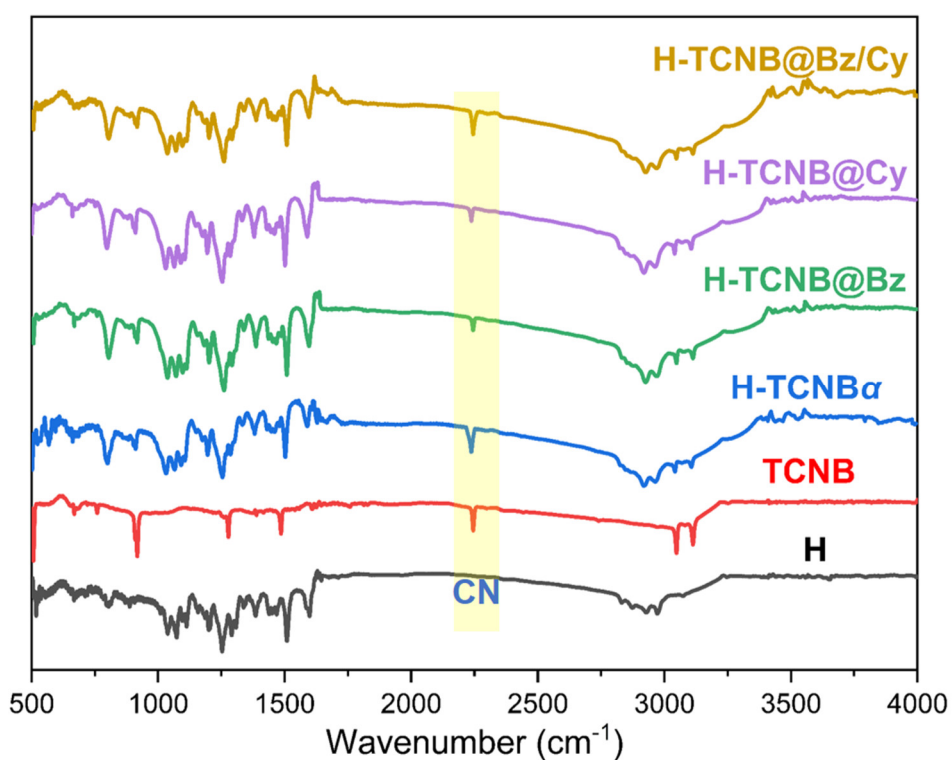

**Supplementary Figure 54.** FT-IR spectra of H, TCNB, H-TCNB $\alpha$ , H-TCNB@Bz, H-TCNB@Cy, and H-TCNB@Bz/Cy.

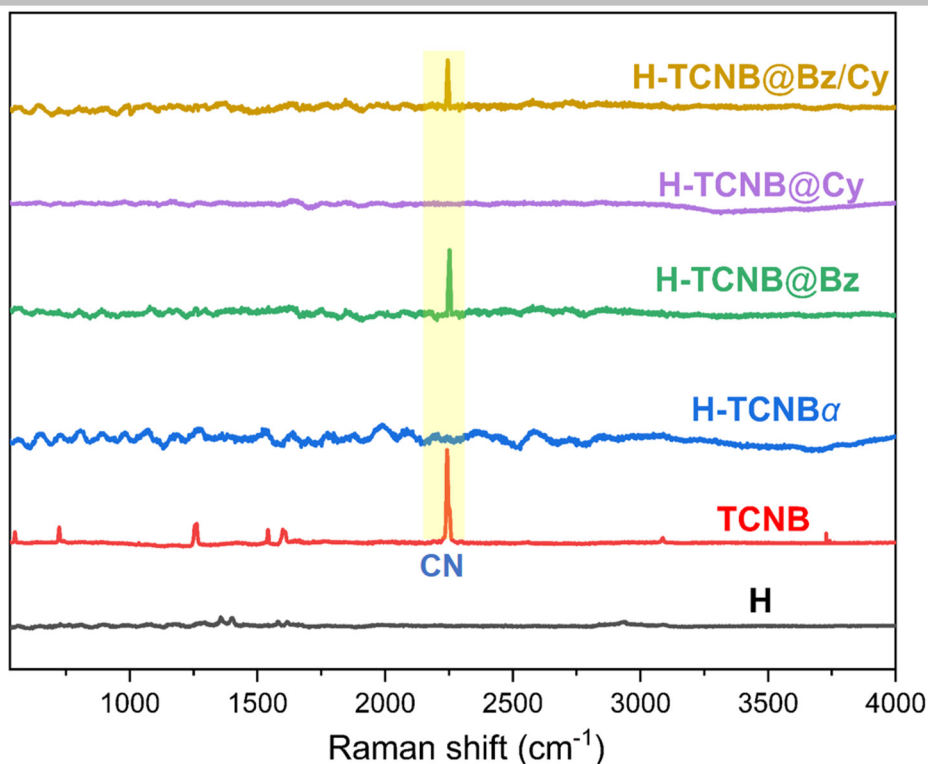

**Supplementary Figure 55.** Raman spectra of H, TCNB, H-TCNB $\alpha$ , H-TCNB@Bz, H-TCNB@Cy, and H-TCNB@Bz/Cy.

### 2.9. Selectivity experiments of H-TCNB $\alpha$ for the mixture vapors of Tol and Py

An open 5 mL vial containing 2 mg of H-TCNB $\alpha$  adsorbent was placed in a sealed 20 mL vial containing 1 mL of a Tol/Py mixture ( $v:v = 1:1$ ). Uptake in H-TCNB $\alpha$  was measured hour by hour by completely dissolving the crystals and measuring the ratio of Tol or Py to H-TCNB $\alpha$  by  $^1\text{H}$  NMR. The relative uptakes of Tol and Py in H $\alpha$  were also measured by heating the crystals to release the adsorbed vapor and detecting the relative amounts of Tol and Py in the released vapor using headspace gas chromatography.

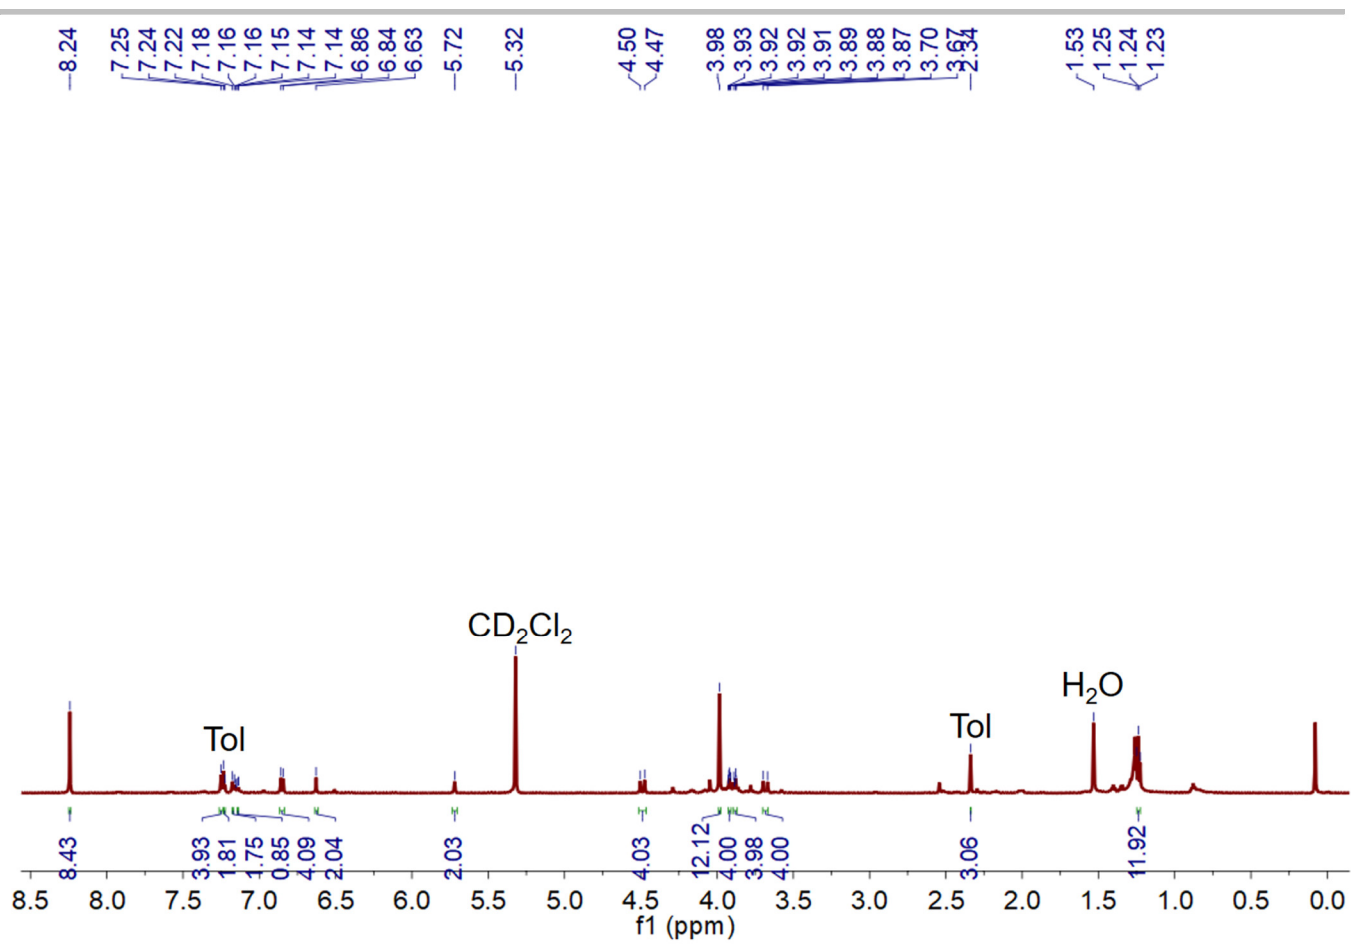

**Supplementary Figure 56.**  $^1\text{H}$  NMR spectrum (500 MHz,  $\text{CD}_2\text{Cl}_2$ , 293 K) of  $\text{H}\alpha$  after adsorption of a Tol/Py mixture ( $v:v = 1:1$ ) vapor for 24 h.

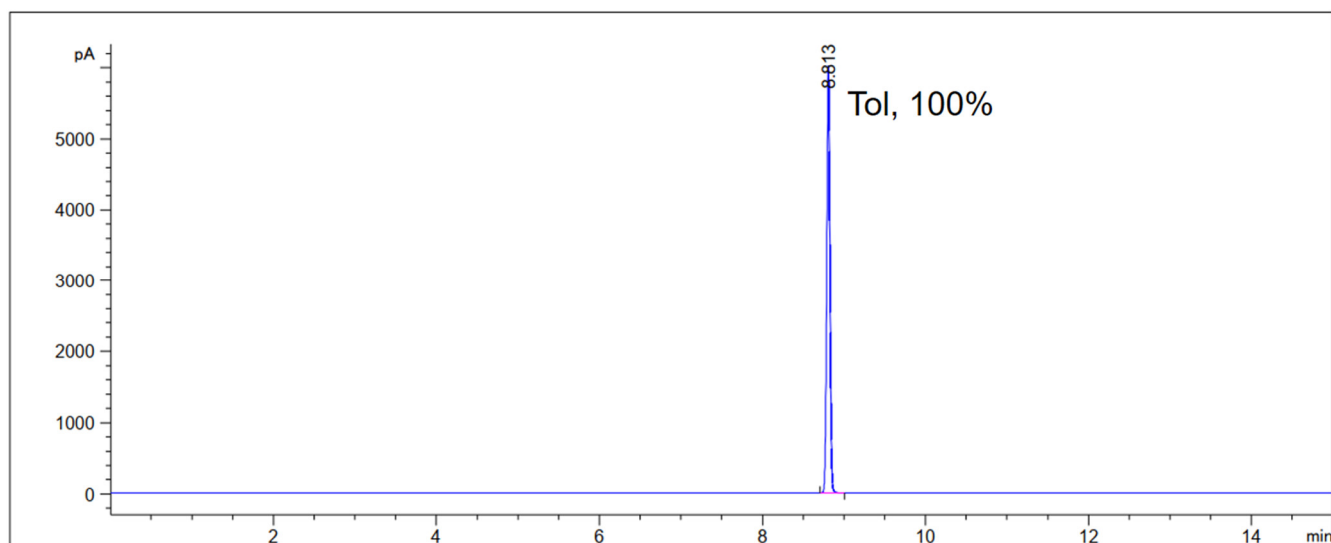

**Supplementary Figure 57.** Relative uptakes of Tol and Py adsorbed in  $\text{H-TCNB}\alpha$  for 24 h using head space gas chromatography.



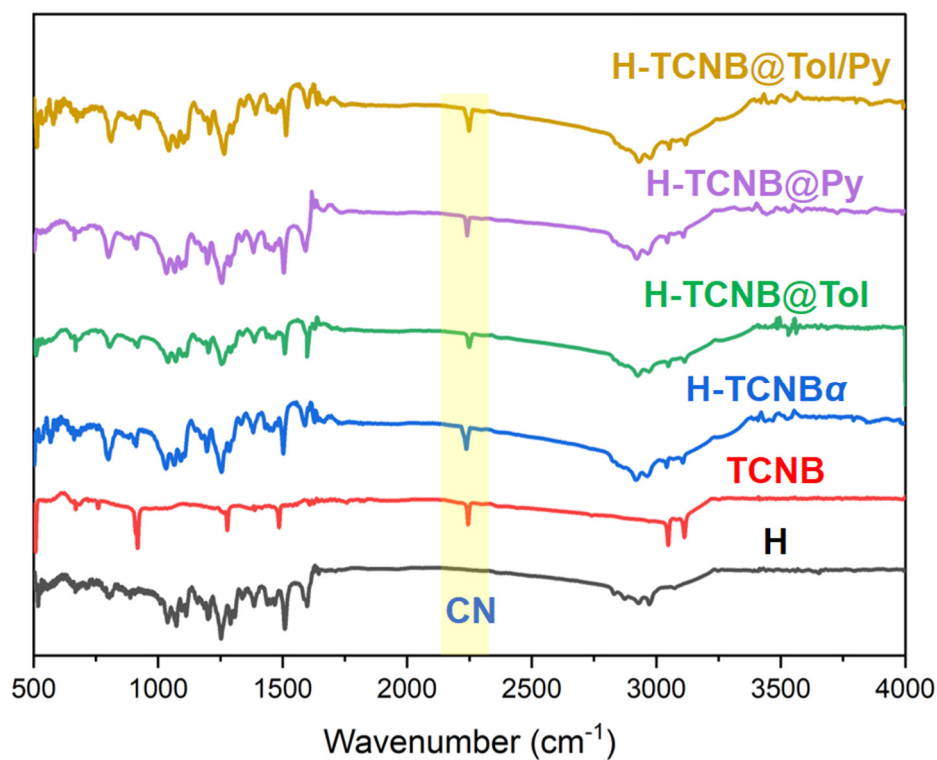

**Supplementary Figure 58.** FT-IR spectra of H, TCNB, H-TCNB $\alpha$ , H-TCNB@Tol, H-TCNB@Py, and H-TCNB@Tol/Py.

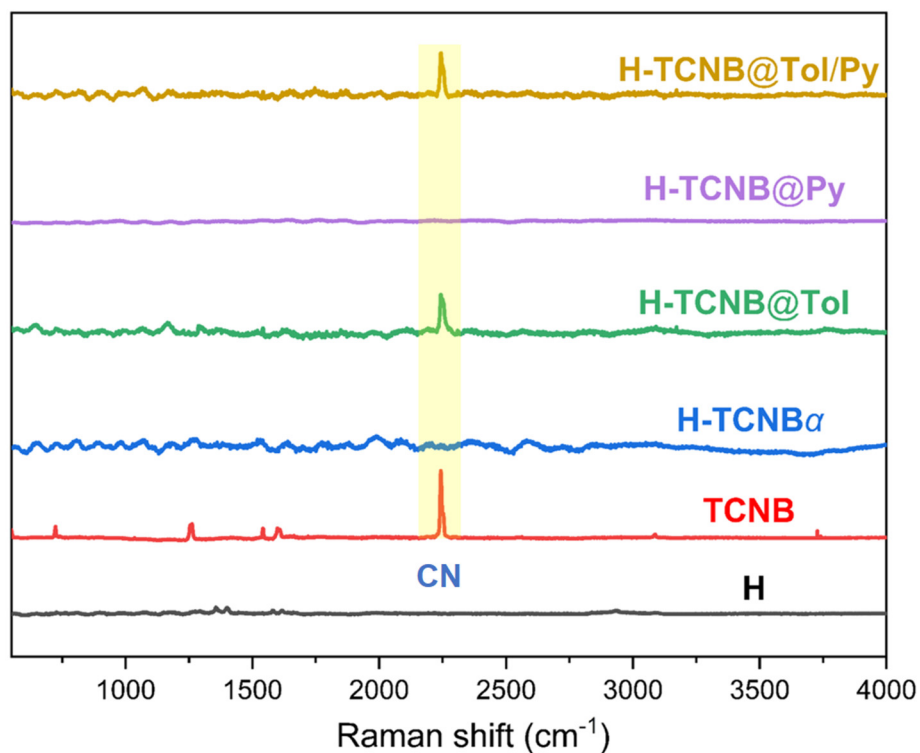

**Supplementary Figure 59.** Raman spectra of H, TCNB, H-TCNB $\alpha$ , H-TCNB@Tol, H-TCNB@Py, and H-TCNB@Tol/Py.

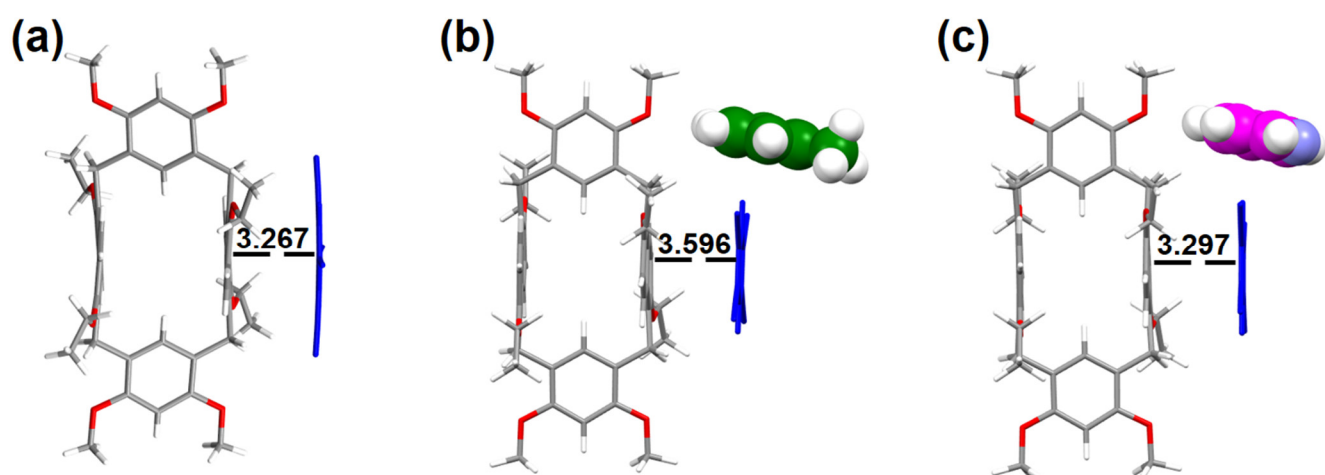

**Supplementary Figure 60.** The centroid-centroid distance of H with TCNB in (a) H-TCNB $\alpha$  (3.267 Å) and calculated binding modes of (b) H-TCNB@Tol (3.596 Å) and (c) H-TCNB@Py (3.587 Å).

**Supplementary Table 4.** Thermodynamic parameters of calculated binding modes of H-TCNB@Tol and H-TCNB@Py at 298 K.

|            | $\Delta H$ (kJ/mol) | $\Delta G$ (kJ/mol) |
|------------|---------------------|---------------------|
| H-TCNB@Tol | -43.33              | -38.33              |
| H-TCNB@Py  | 20.16               | 12.20               |

## 2.10. Purity experiments of liquid Cy or Py by H-TCNB $\alpha$

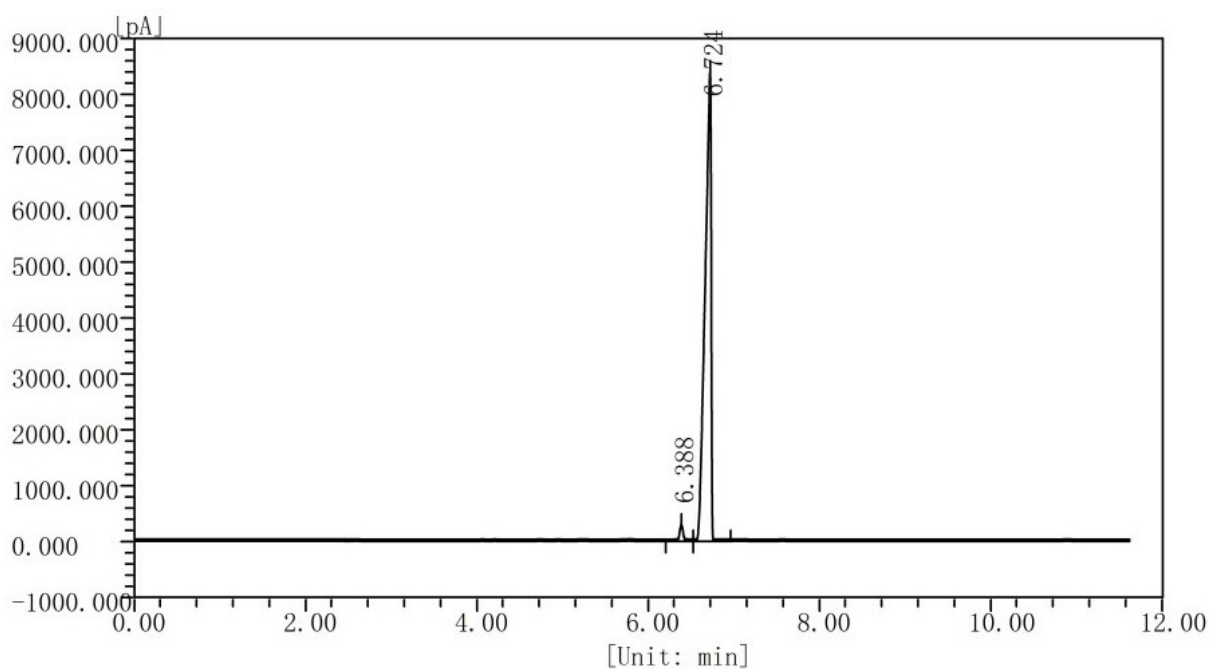

### Analysis Report

| Peak    | Component | RetTime<br>[min] | Height<br>[uV] | Area<br>[uV*s] | Area<br>[%] | Content<br>[%] |
|---------|-----------|------------------|----------------|----------------|-------------|----------------|
| 1       | <b>Bz</b> | 6.388            | 291542.0       | 824061.4       | 1.9910      | 1.9910         |
| 2       | <b>Cy</b> | 6.724            | 8397338.9      | 40565863.0     | 98.0090     | 98.0090        |
| Totals: |           |                  | 8688881.0      | 41389924.0     | 100.0000    | 100.0000       |

**Supplementary Figure 61.** GC analysis of the sample of 98:2 Cy/Bz.

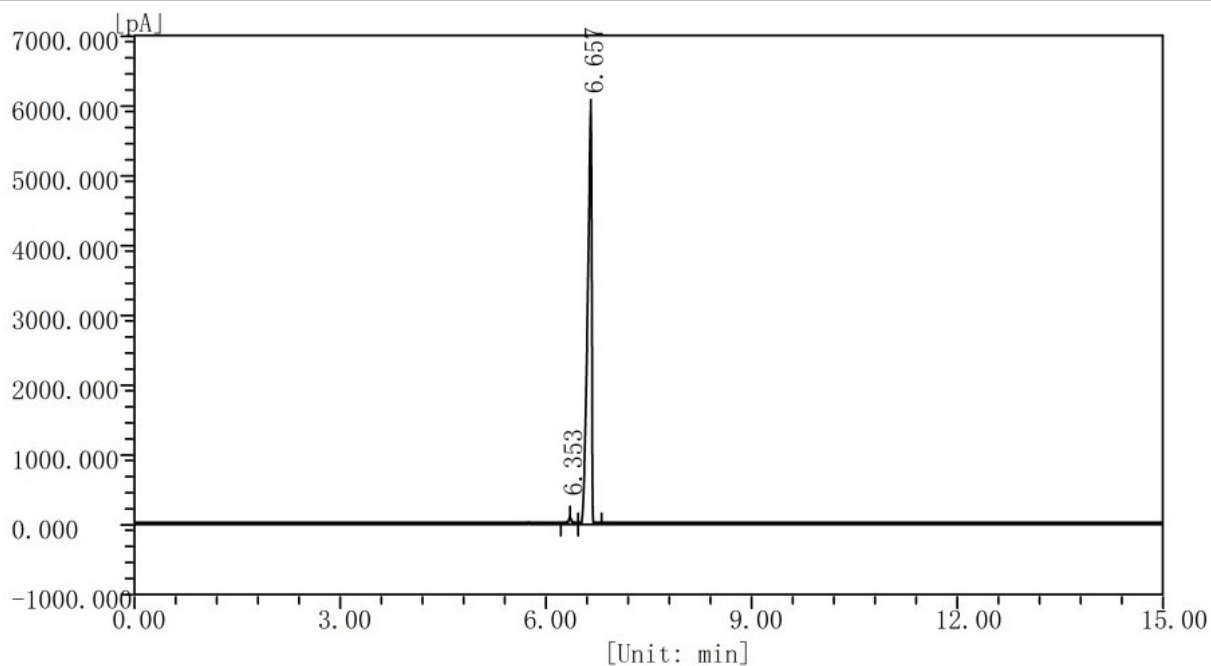

### Analysis Report

| Peak    | Component | RetTime<br>[min] | Height<br>[uV] | Area<br>[uV*s] | Area<br>[%] | Content<br>[%] |
|---------|-----------|------------------|----------------|----------------|-------------|----------------|
| 1       | <b>Bz</b> | 6.353            | 99565.2        | 301520.9       | 1.2052      | 1.2052         |
| 2       | <b>Cy</b> | 6.657            | 5925516.1      | 24715940.6     | 98.7948     | 98.7948        |
| Totals: |           |                  | 6025081.0      | 25017462.0     | 100.0000    | 100.0000       |

**Supplementary Figure 62.** GC analysis of the 98:2 Cy/Bz after adsorption by H-TCNB $\alpha$  (3.00 mg).

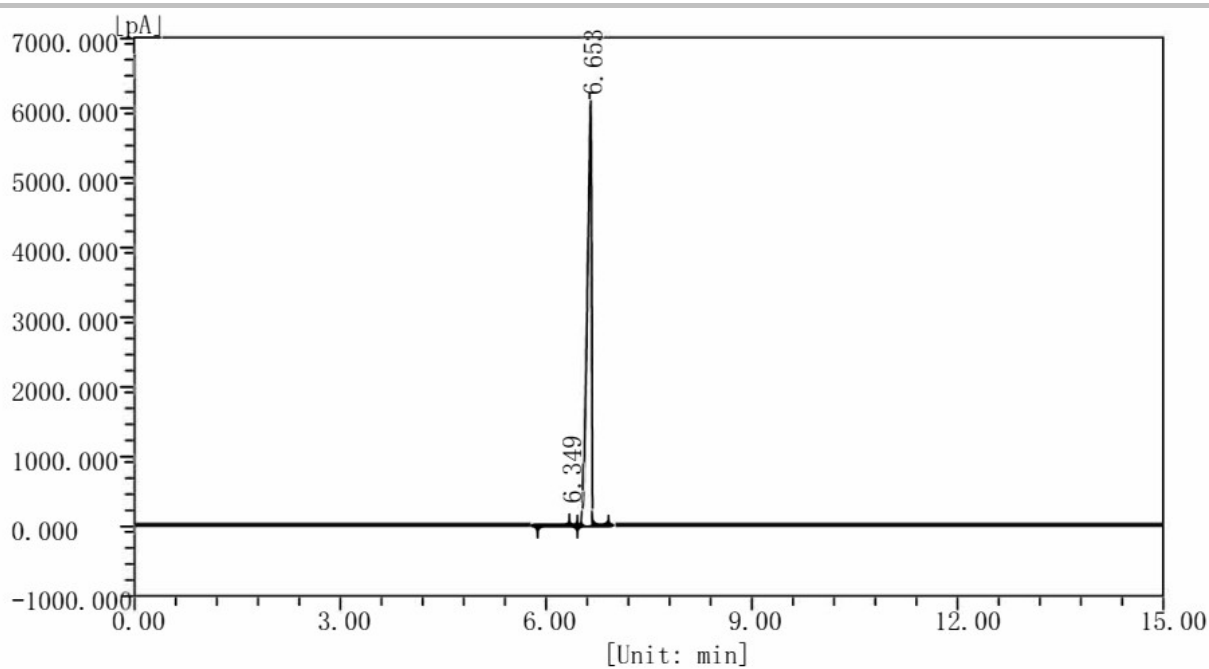

### Analysis Report

| Peak    | Component | RetTime<br>[min] | Height<br>[uV] | Area<br>[uV*s] | Area<br>[%] | Content<br>[%] |
|---------|-----------|------------------|----------------|----------------|-------------|----------------|
| 1       | <b>Bz</b> | 6.349            | 63596.9        | 222584.7       | 0.5680      | 0.5680         |
| 2       | <b>Cy</b> | 6.653            | 8940172.8      | 38964739.9     | 99.4320     | 99.4320        |
| Totals: |           |                  | 9003769.7      | 39187324.6     | 100.0000    | 100.0000       |

**Supplementary Figure 63.** GC analysis of the 98:2 Cy/Bz after adsorption by H-TCNB $\alpha$  (6.00 mg).

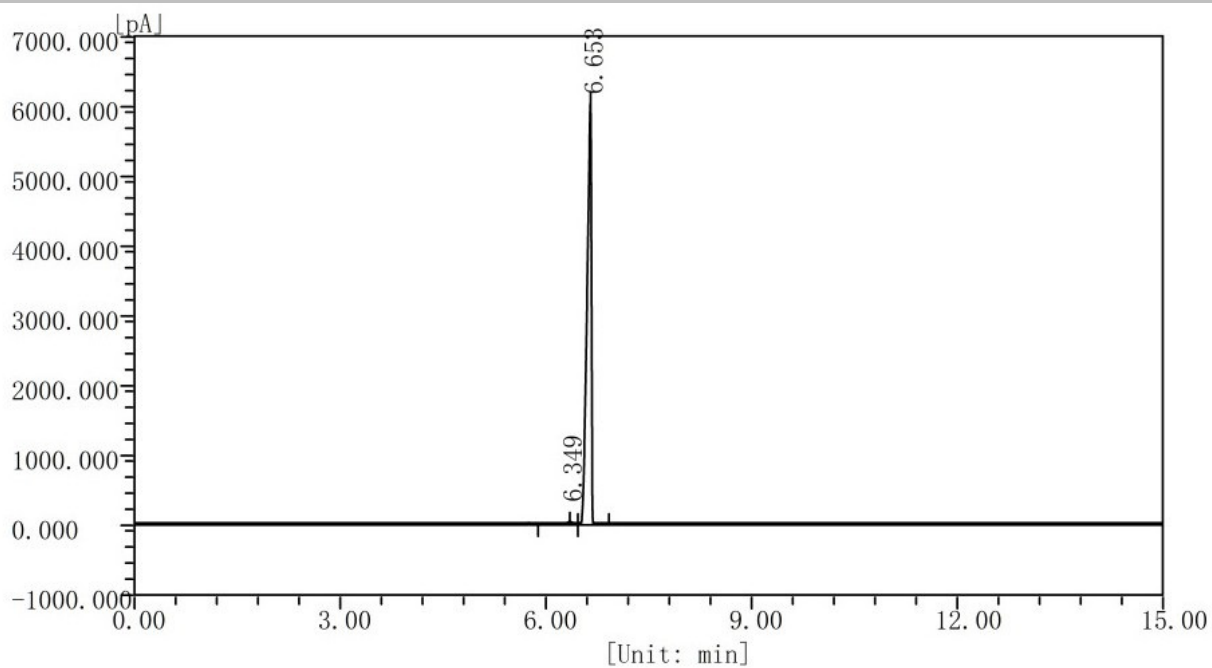

### Analysis Report

| Peak    | Component | RetTime<br>[min] | Height<br>[uV] | Area<br>[uV*s] | Area<br>[%] | Content<br>[%] |
|---------|-----------|------------------|----------------|----------------|-------------|----------------|
| 1       | <b>Bz</b> | 6.349            | 20552.9        | 71933.7        | 0.2720      | 0.2720         |
| 2       | <b>Cy</b> | 6.653            | 6050902.8      | 26372177.1     | 99.7280     | 99.7280        |
| Totals: |           |                  | 6071455.5      | 26444110.0     | 100.0000    | 100.0000       |

**Supplementary Figure 64.** GC analysis of the 98:2 Cy/Bz after adsorption by H-TCNB $\alpha$  (9.00 mg).

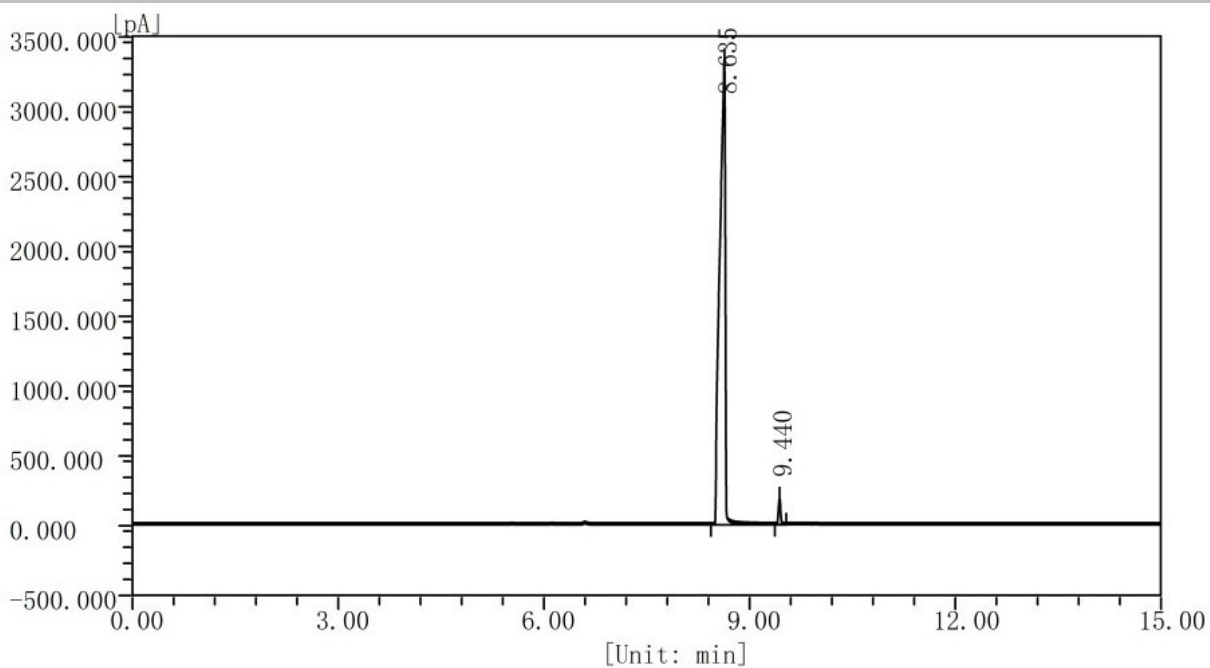

### Analysis Report

| Peak    | Component  | RetTime<br>[min] | Height<br>[uV] | Area<br>[uV*s] | Area<br>[%] | Content<br>[%] |
|---------|------------|------------------|----------------|----------------|-------------|----------------|
| 1       | <b>Py</b>  | 8.635            | 3330020.8      | 18631926.3     | 97.9385     | 97.9385        |
| 2       | <b>Tol</b> | 9.440            | 186273.1       | 392189.2       | 2.0615      | 2.0615         |
| Totals: |            |                  | 3516294.0      | 19024116.0     | 100.0000    | 100.0000       |

**Supplementary Figure 65.** GC analysis of 98:2 Py/Tol.

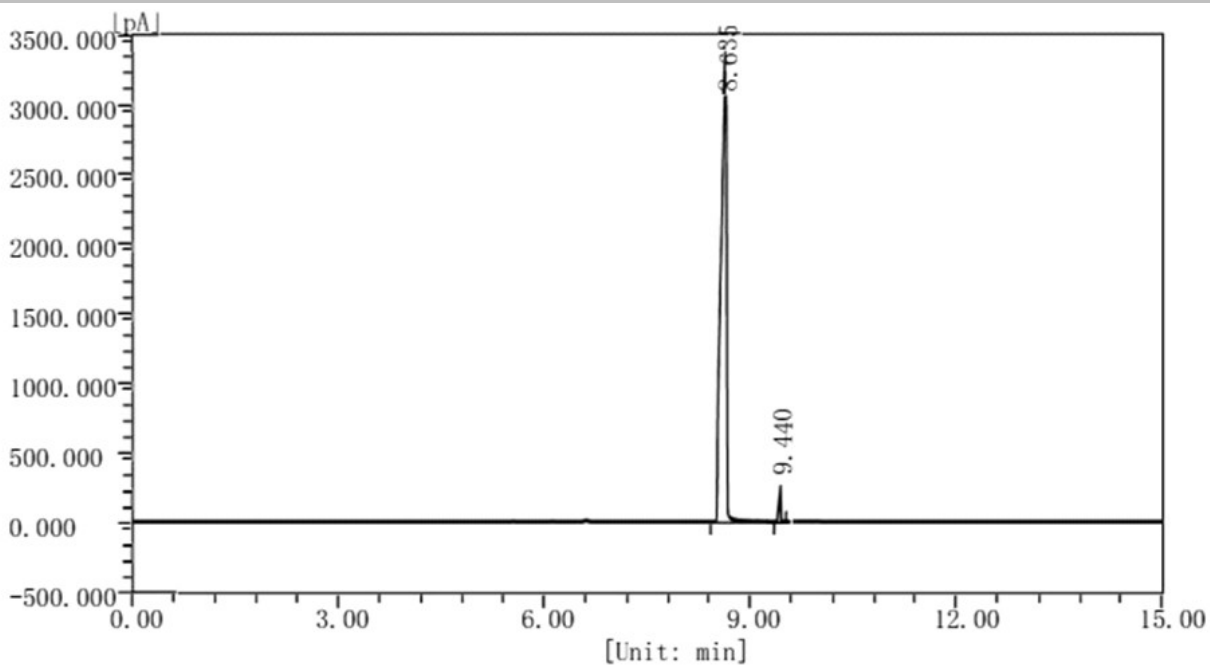

### Analysis Report

| Peak    | Component  | RetTime<br>[min] | Height<br>[uV] | Area<br>[uV*s] | Area<br>[%] | Content<br>[%] |
|---------|------------|------------------|----------------|----------------|-------------|----------------|
| 1       | <b>Py</b>  | 8.635            | 3870305.7      | 21654895.2     | 98.4877     | 98.4877        |
| 2       | <b>Tol</b> | 9.440            | 164584.2       | 346524.3       | 1.5123      | 1.5123         |
| Totals: |            |                  | 4034890.0      | 22001420.0     | 100.0000    | 100.0000       |

**Supplementary Figure 66.** GC analysis of the 98:2 Py/Tol after adsorption by H-TCNB $\alpha$  (3.00 mg).



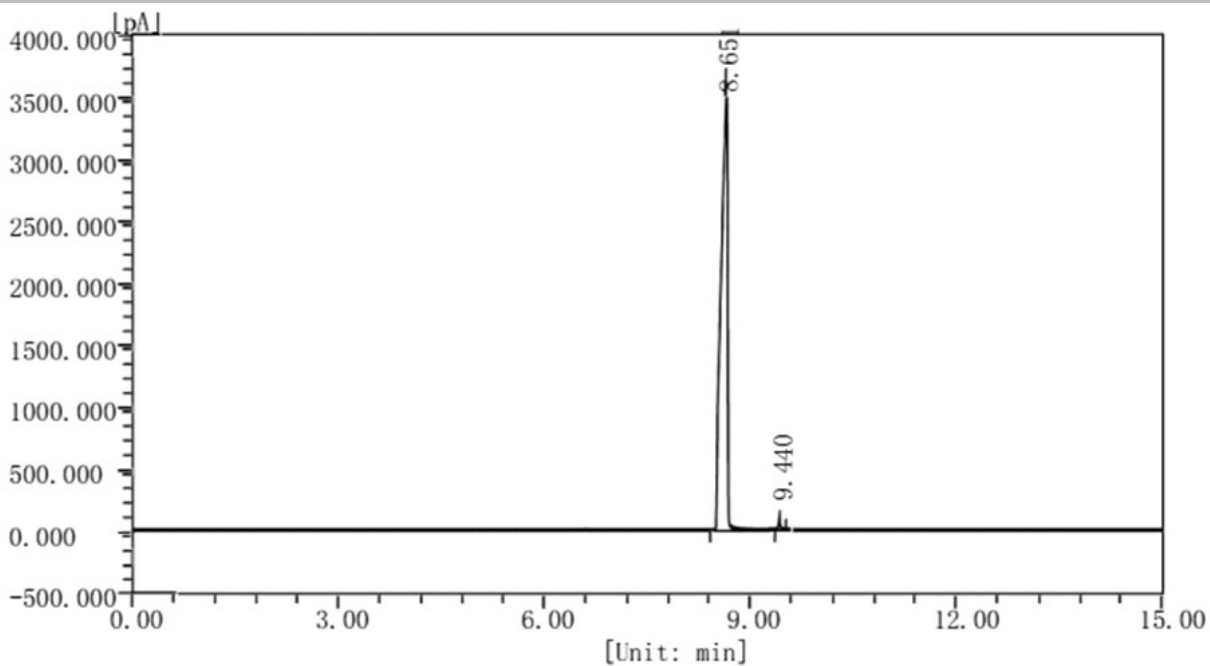

Analysis Report

| Peak    | Component  | RetTime<br>[min] | Height<br>[uV] | Area<br>[uV*s] | Area<br>[%] | Content<br>[%] |
|---------|------------|------------------|----------------|----------------|-------------|----------------|
| 1       | <b>Py</b>  | 8.651            | 401293.7       | 22452941.3     | 99.0421     | 99.0421        |
| 2       | <b>Tol</b> | 9.440            | 95666.5        | 201421.4       | 0.9579      | 0.9579         |
| Totals: |            |                  | 496960.2       | 22654362.7     | 100.0000    | 100.0000       |

**Supplementary Figure 67.** GC analysis of the 98:2 Py/Tol after adsorption by H-TCNB $\alpha$  (6.00 mg).

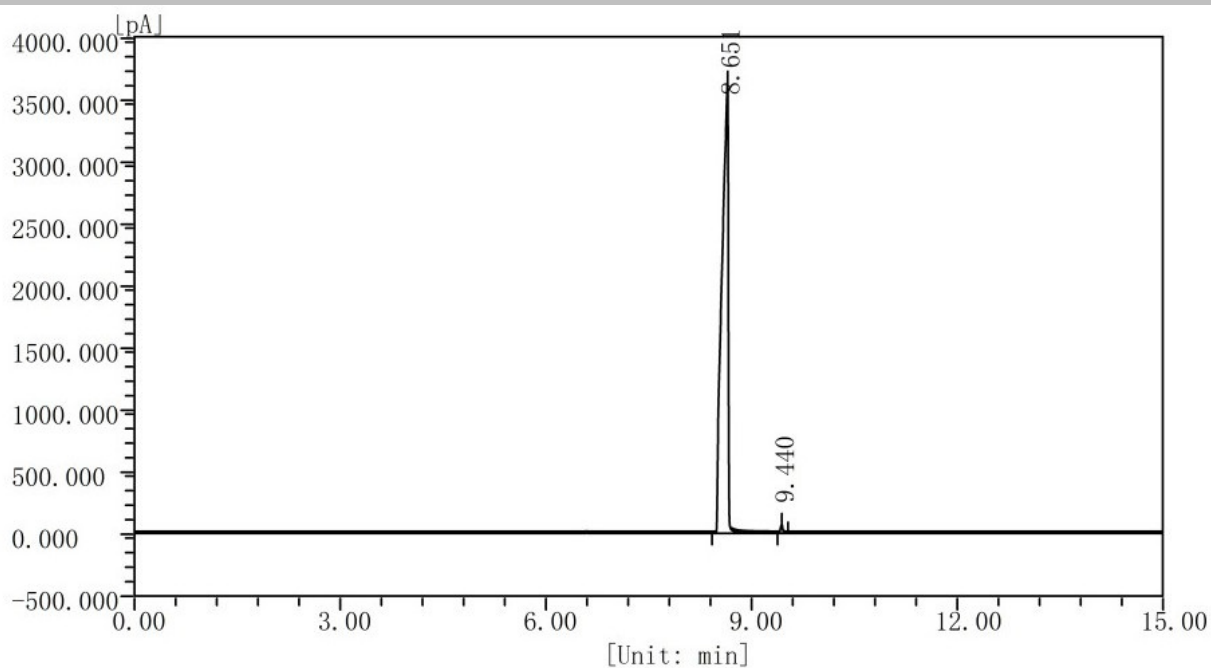

### Analysis Report

| Peak    | Component  | RetTime<br>[min] | Height<br>[uV] | Area<br>[uV*s] | Area<br>[%] | Content<br>[%] |
|---------|------------|------------------|----------------|----------------|-------------|----------------|
| 1       | <b>Py</b>  | 8.651            | 3638153.3      | 23316906.7     | 99.3540     | 99.3540        |
| 2       | <b>Tol</b> | 9.440            | 69336.0        | 151597.3       | 0.6460      | 0.6460         |
| Totals: |            |                  | 3707489.3      | 23468504.0     | 100.0000    | 100.0000       |

**Supplementary Figure 68.** GC analysis of the 98:2 Py/Tol after adsorption by H-TCNB $\alpha$  (9.00 mg).

## 2.11. Recyclability of H-TCNB $\alpha$

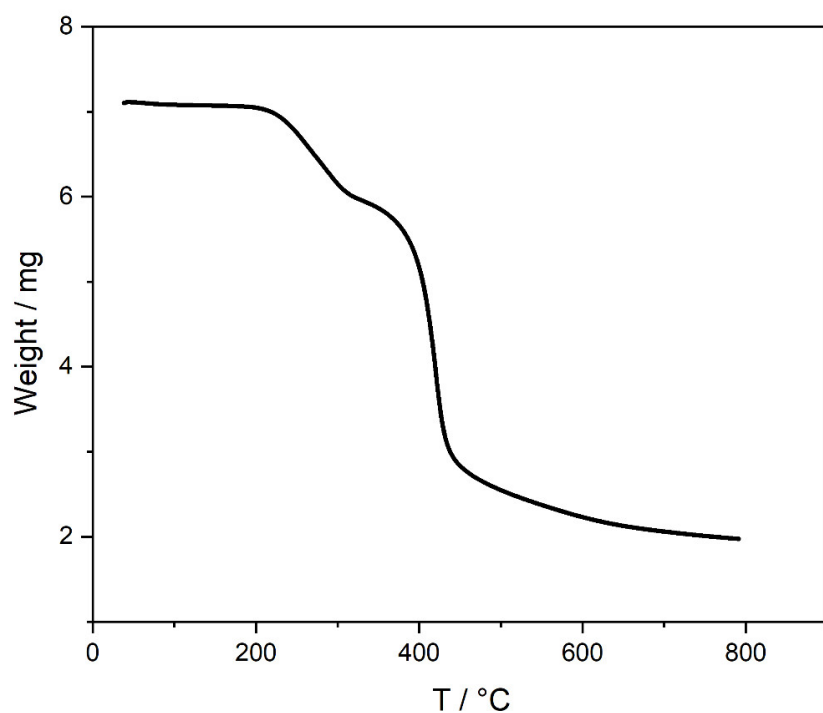

**Supplementary Figure 69.** Thermogravimetric analysis of H-TCNB@Bz after heating at 100 °C under vacuum for 9 h.

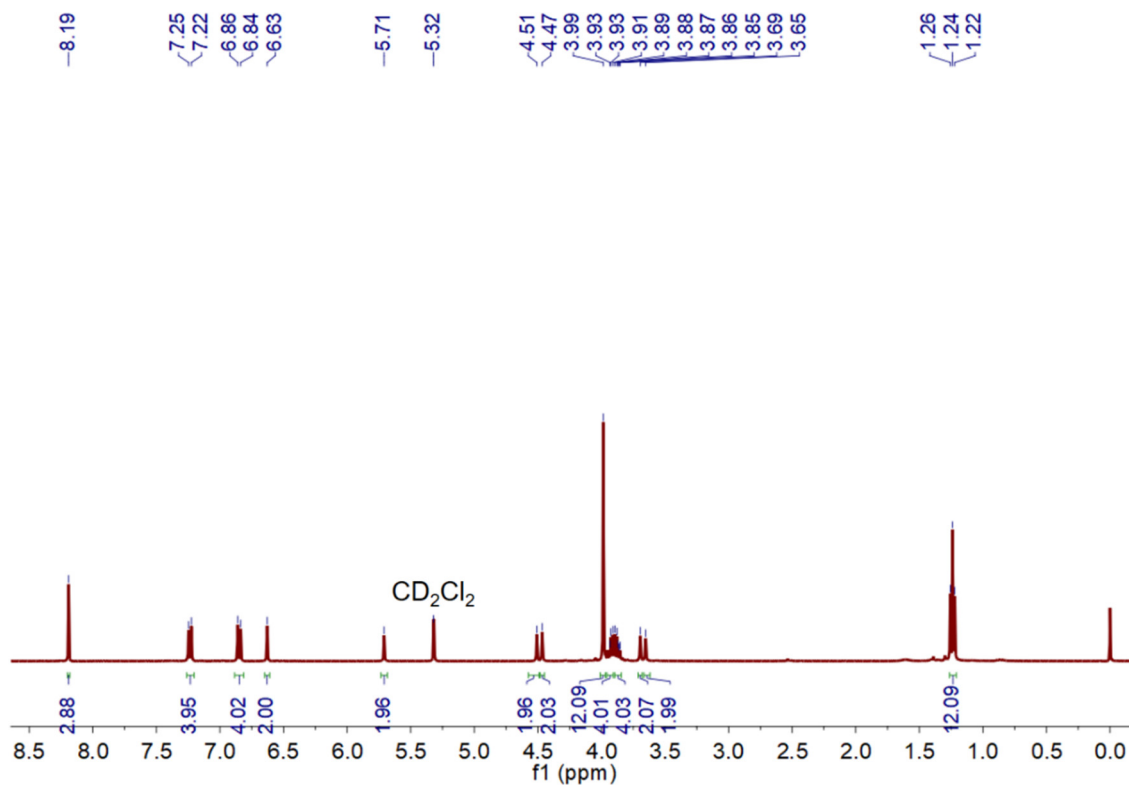

**Supplementary Figure 70.**  $^1\text{H}$  NMR spectrum (500 MHz,  $\text{CD}_2\text{Cl}_2$ , 293 K) of H-TCNB@Bz after heating at 100 °C under vacuum for 9 h.

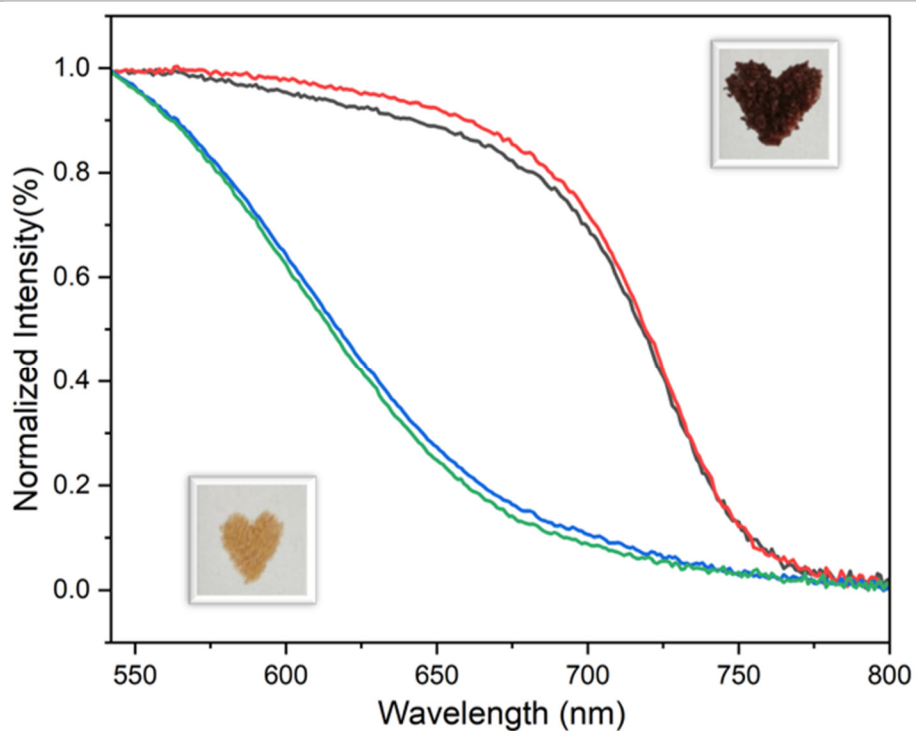

**Supplementary Figure 71.** Diffuse reflectance spectra of H-TCNB $\alpha$  (black line), re-activated H-TCNB $\alpha$  (red line), first uptake of Bz (blue line), and second uptake of Bz (green line).

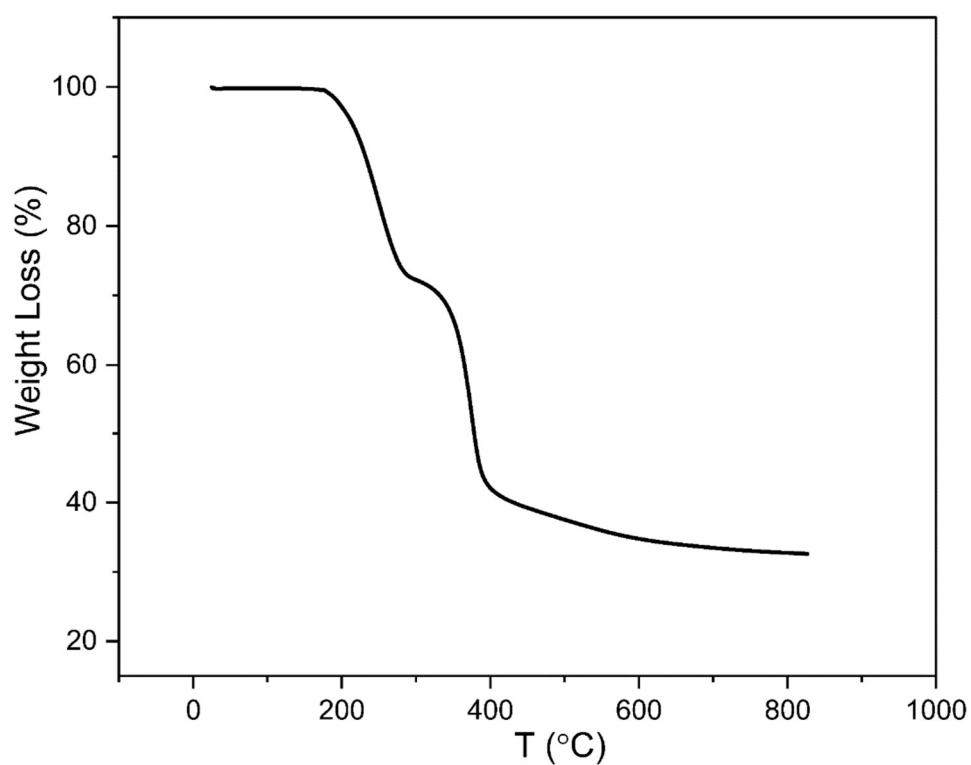

**Supplementary Figure 72.** Thermogravimetric analysis of H-TCNB@Tol after heating at 100 °C under vacuum for 9 h.

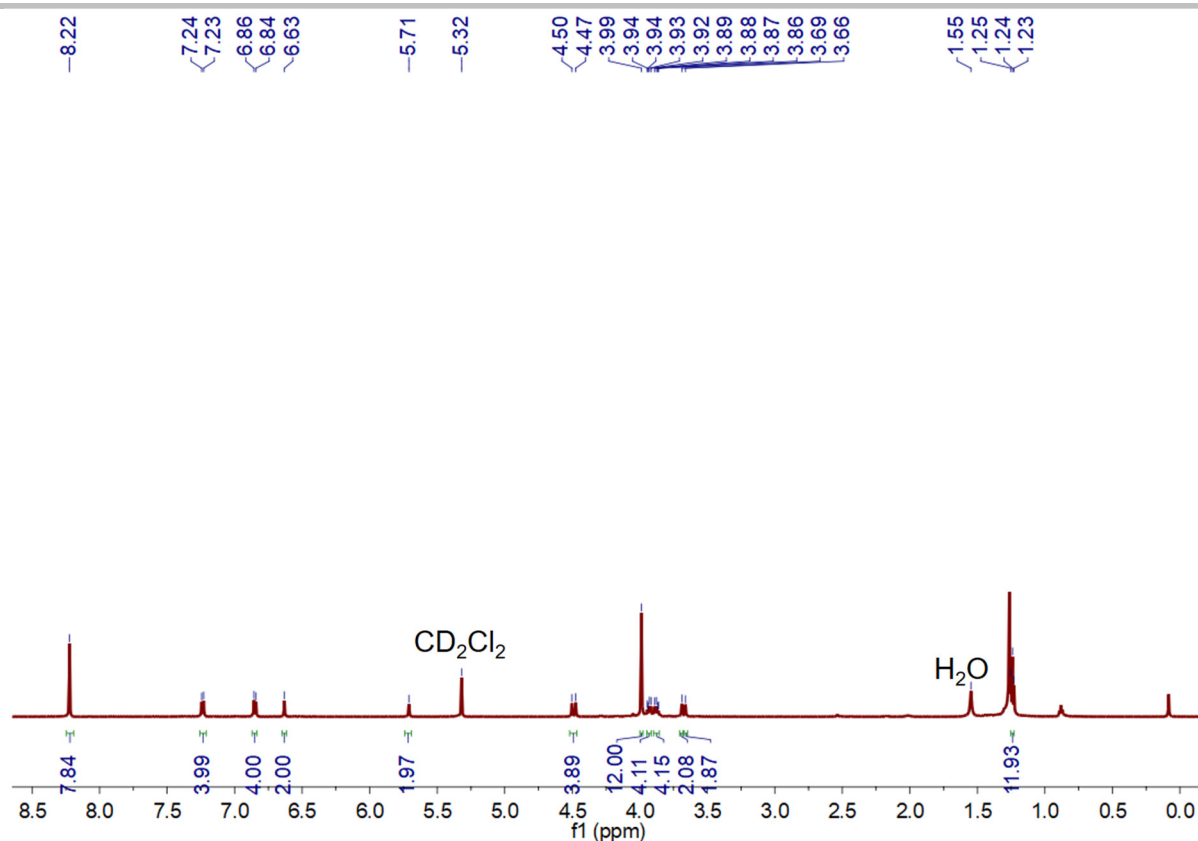

**Supplementary Figure 73.**  $^1\text{H}$  NMR spectrum (500 MHz,  $\text{CD}_2\text{Cl}_2$ , 293 K) of H-TCNB@Tol after heating at 100 °C under vacuum for 9 h.

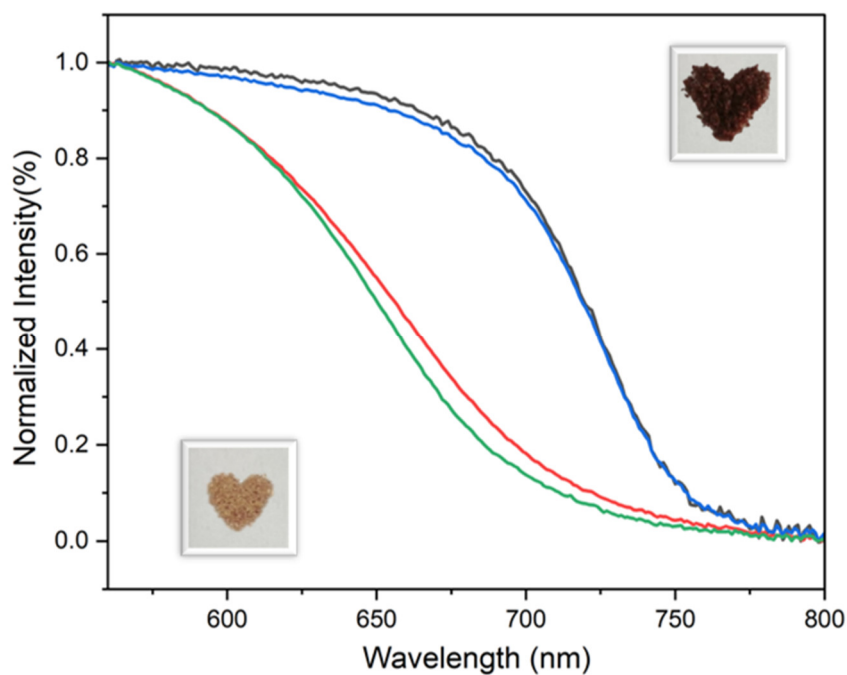

**Supplementary Figure 74.** Diffuse reflectance spectra of H-TCNB $\alpha$  (black line), re-activated H-TCNB $\alpha$  (red line), first uptake of Tol (blue line), and second uptake of Tol (green line).

## 2.12. Vapochromic behaviors experiments based on co-crystals of DON-TCNB $\alpha$ and DOB-TCNB $\alpha$

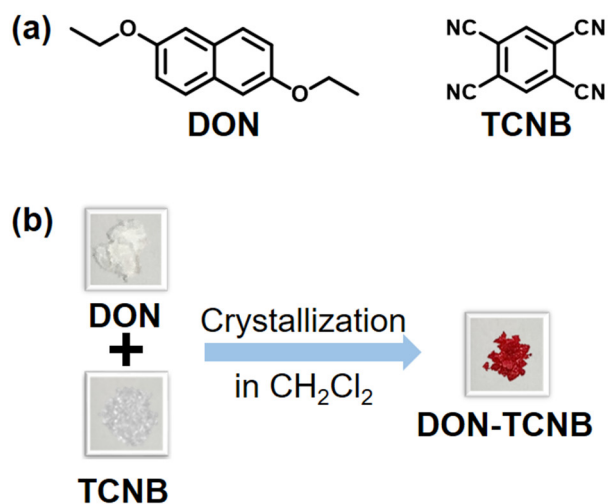

**Supplementary Figure 75.** (a) Chemical structures of DON and TCNB. (b) Images of DON, TCNB and DON-TCNB.

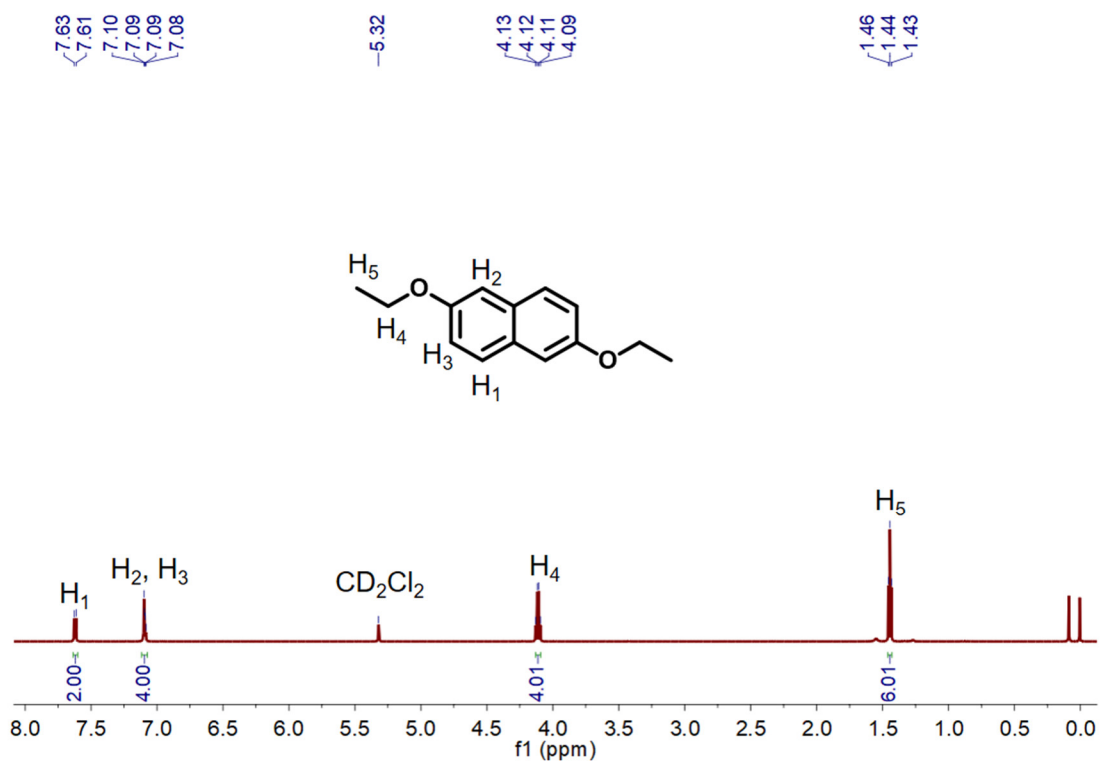

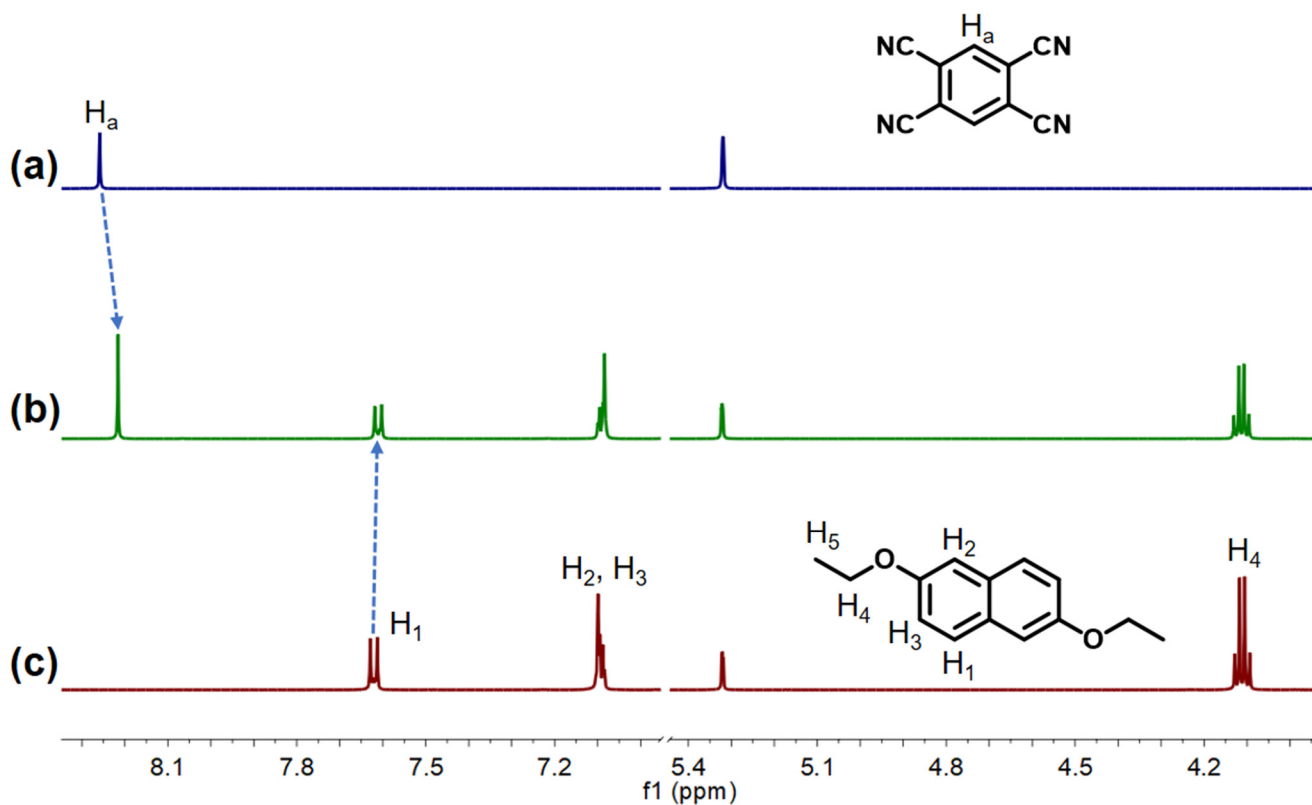

**Supplementary Figure 77.** Partial  $^1\text{H}$  NMR spectra (600 MHz,  $\text{CD}_2\text{Cl}_2$ , 293 K) of (a) free TCNB (10.0 mM), (b) DON (10.0 mM) and TCNB (10.0 mM), and (c) free DON (10.0 mM).

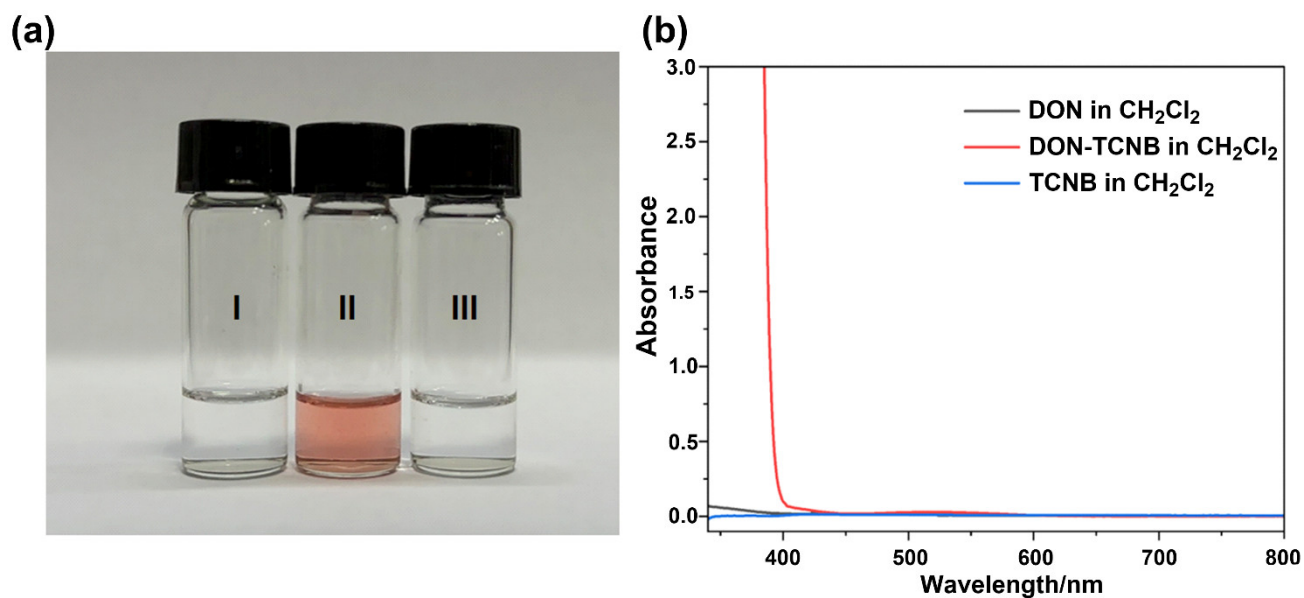

**Supplementary Figure 78.** (a) Images: (I) DON (5.00 mM) in  $\text{CH}_2\text{Cl}_2$ ; (II) DON (5.00 mM) and TCNB (5.00 mM) in  $\text{CH}_2\text{Cl}_2$ ; (III) TCNB (5.00 mM) in  $\text{CH}_2\text{Cl}_2$ . (b) UV-vis spectra: DON (5.00 mM); DON (5.00 mM) and TCNB (5.00 mM); TCNB (5.00 mM).

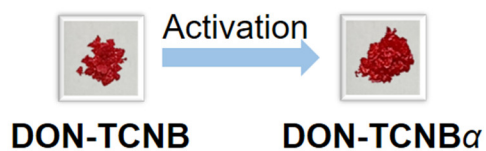

**Supplementary Figure 79.** Images of DON-TCNB and DON-TCNB $\alpha$ .

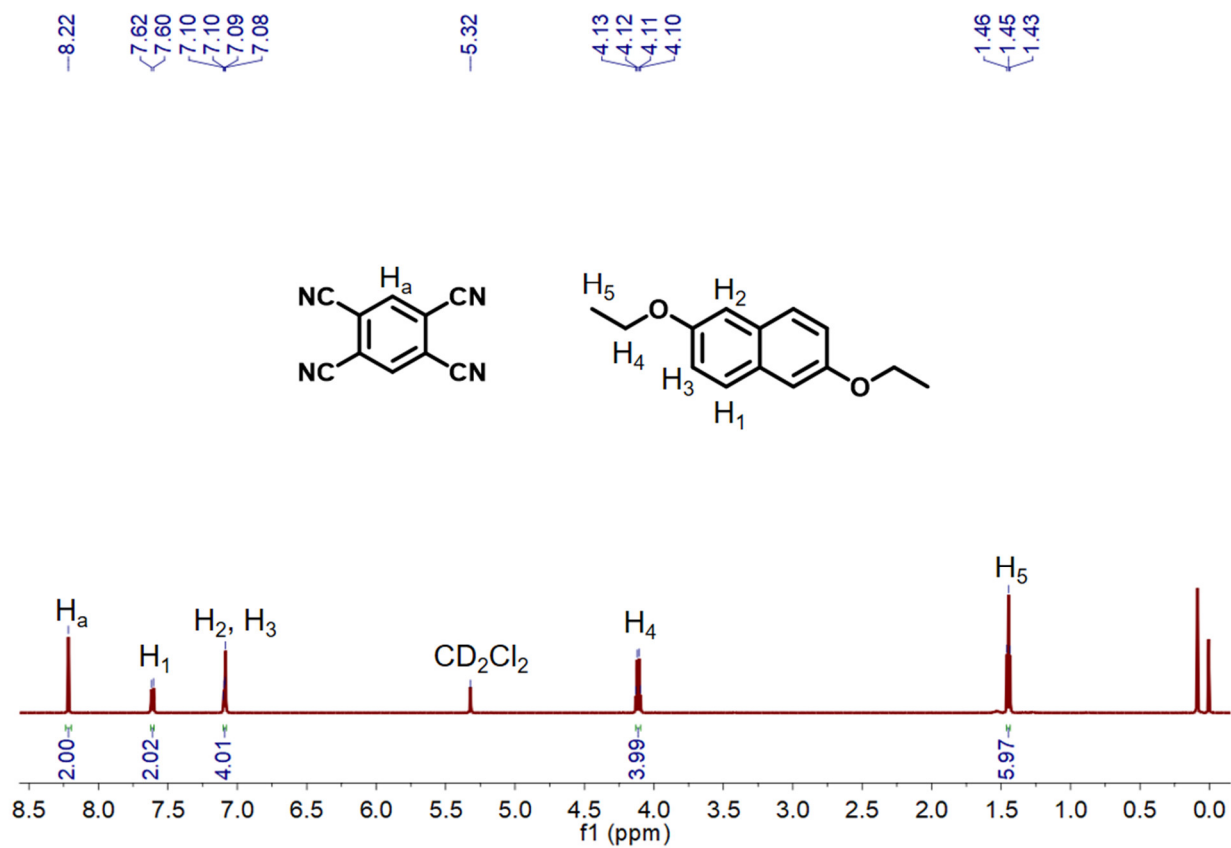

**Supplementary Figure 80.**  $^1\text{H}$  NMR spectrum (500 MHz,  $\text{CD}_2\text{Cl}_2$ , 293 K) of DON-TCNB $\alpha$ .



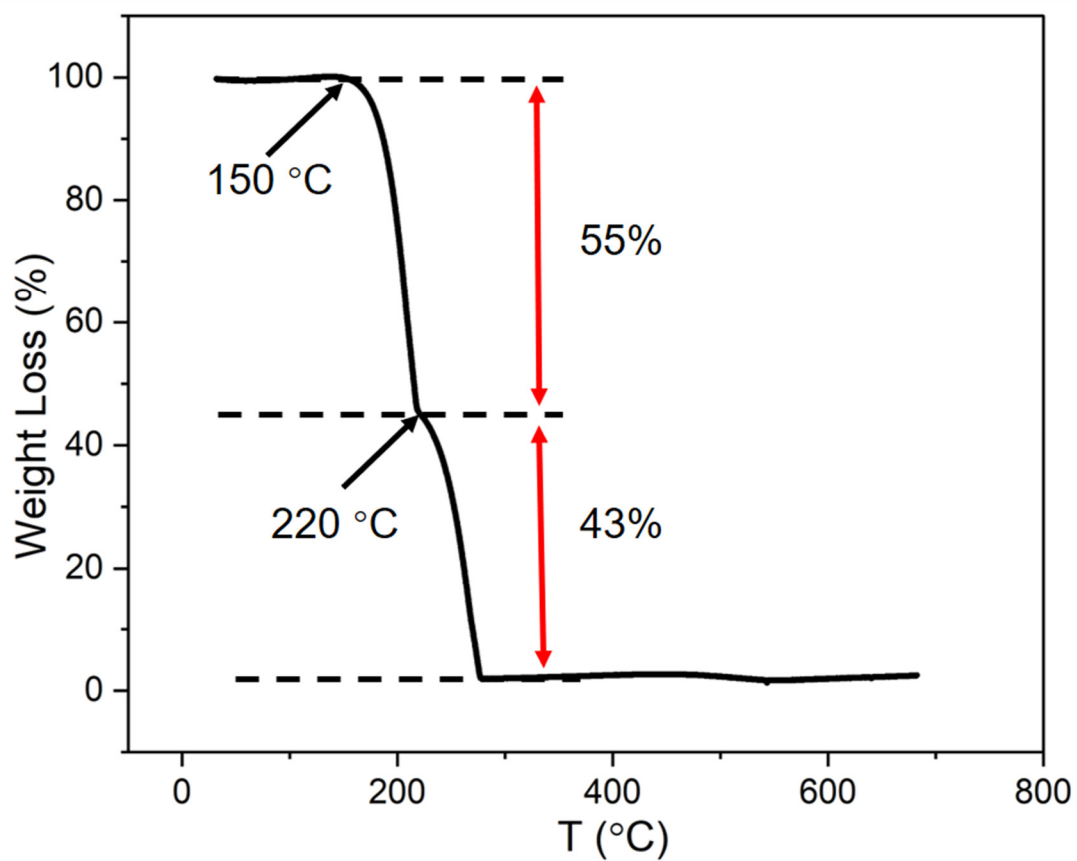

**Supplementary Figure 81.** Thermogravimetric analysis of DON-TCNB $\alpha$ .

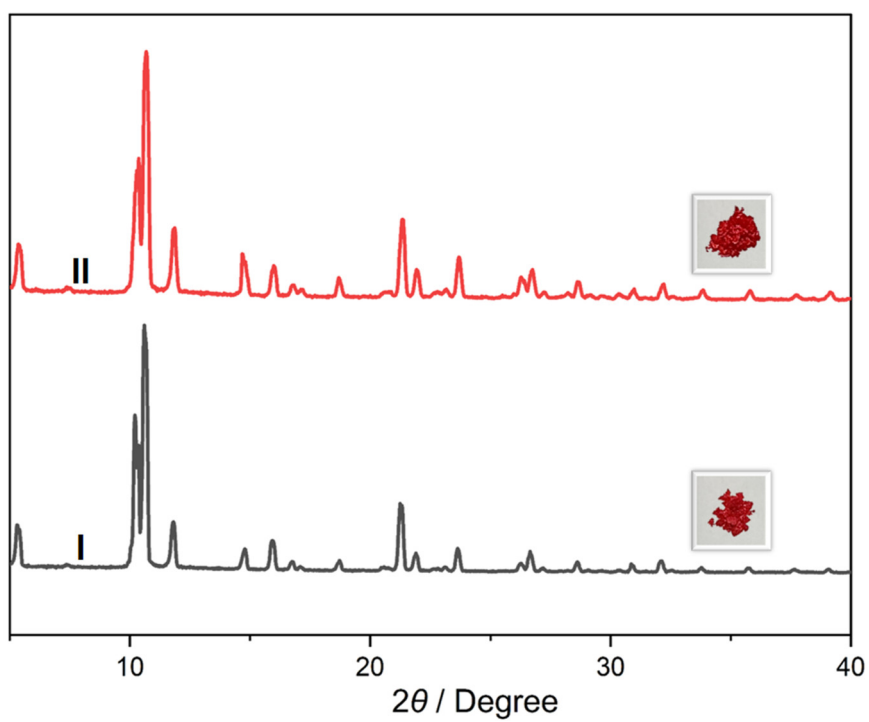

**Supplementary Figure 82.** PXRD patterns and images of (I) DON-TCNB and (II) DON-TCNB $\alpha$ .

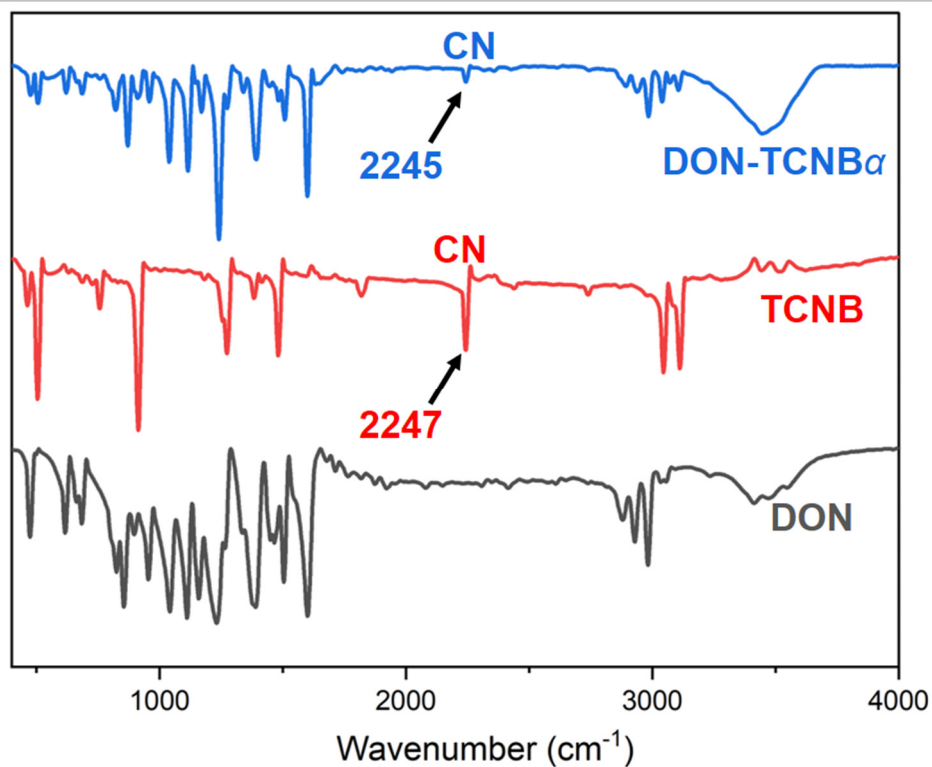

**Supplementary Figure 83.** FT-IR spectra of DON, TCNB and DON-TCNB $\alpha$ .

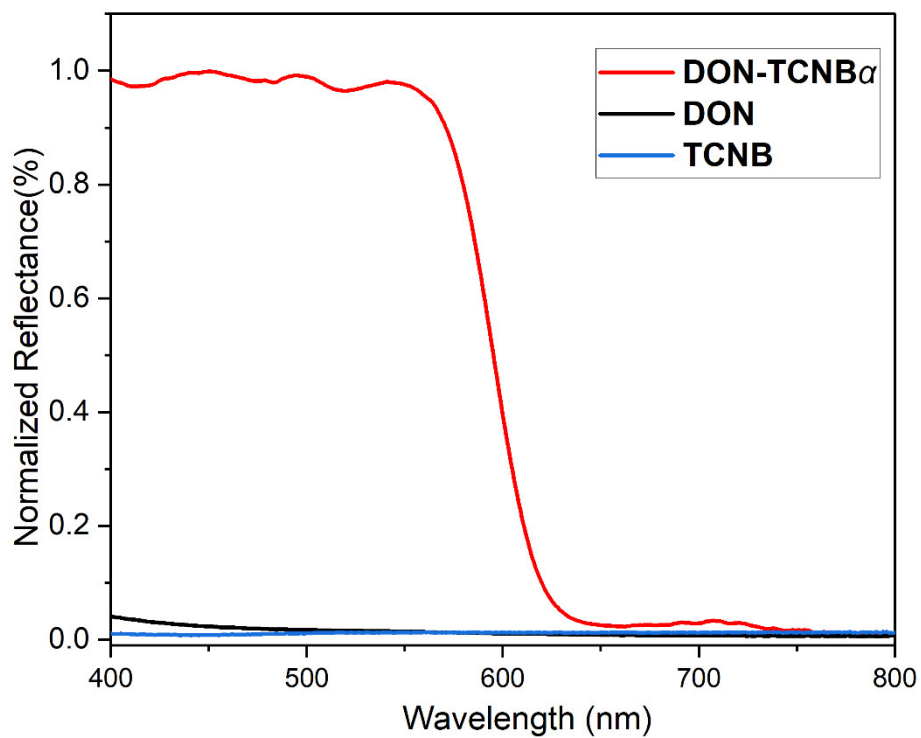

**Supplementary Figure 84.** Diffuse reflectance spectra and images of DON-TCNB $\alpha$ , DON and TCNB.

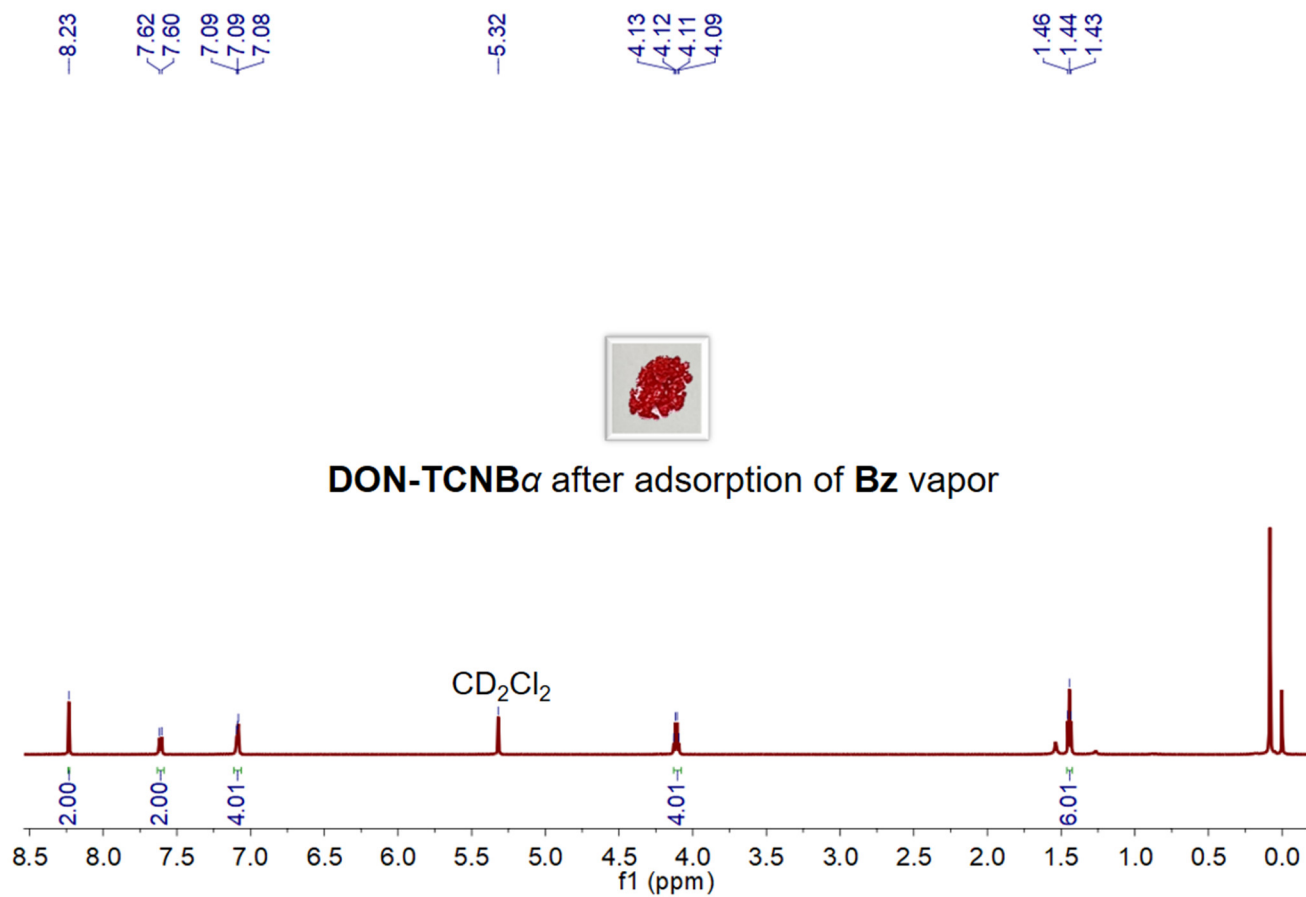

**Supplementary Figure 85.** <sup>1</sup>H NMR spectrum (600 MHz, CD<sub>2</sub>Cl<sub>2</sub>, 293 K) of DON-TCNB $\alpha$  after adsorption of Bz vapor for 24 h.

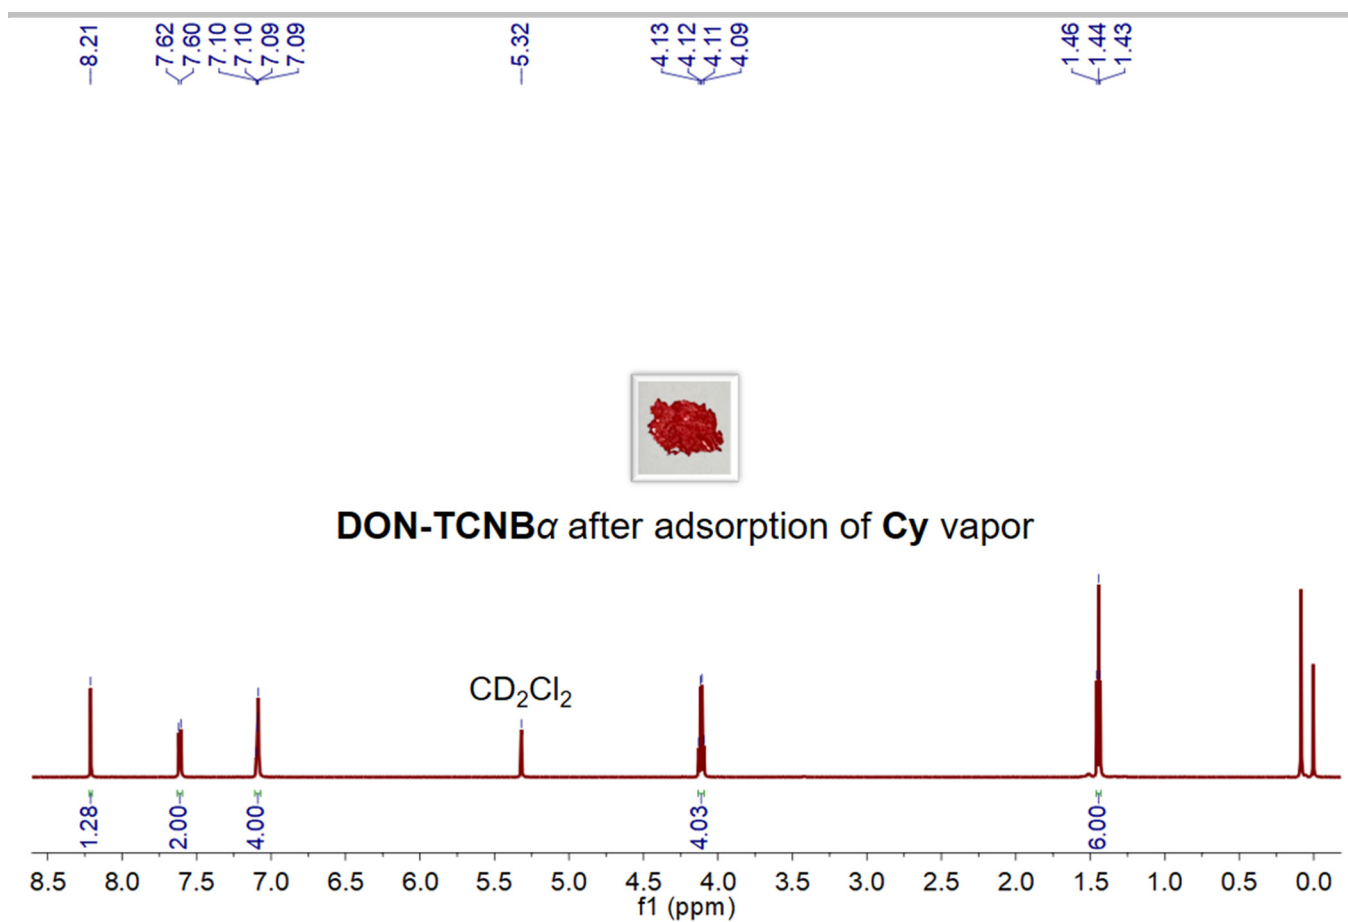

**Supplementary Figure 86.**  $^1H$  NMR spectrum (600 MHz,  $CD_2Cl_2$ , 293 K) of DON-TCNB $\alpha$  after adsorption of Cy vapor for 24 h.

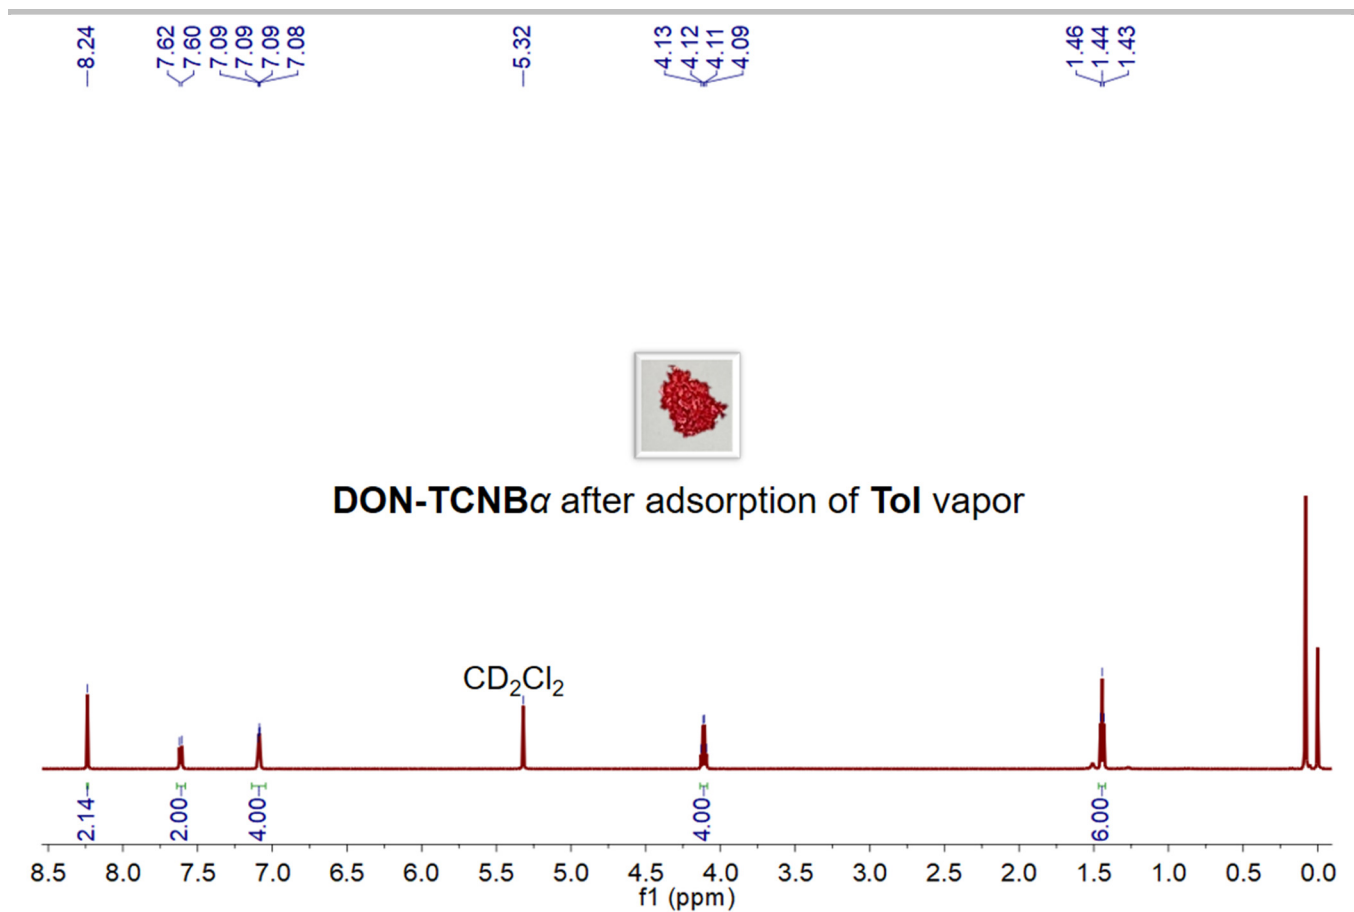

**Supplementary Figure 87.** <sup>1</sup>H NMR spectrum (600 MHz, CD<sub>2</sub>Cl<sub>2</sub>, 293 K) of DON-TCNB $\alpha$  after adsorption of Tol vapor for 24 h.

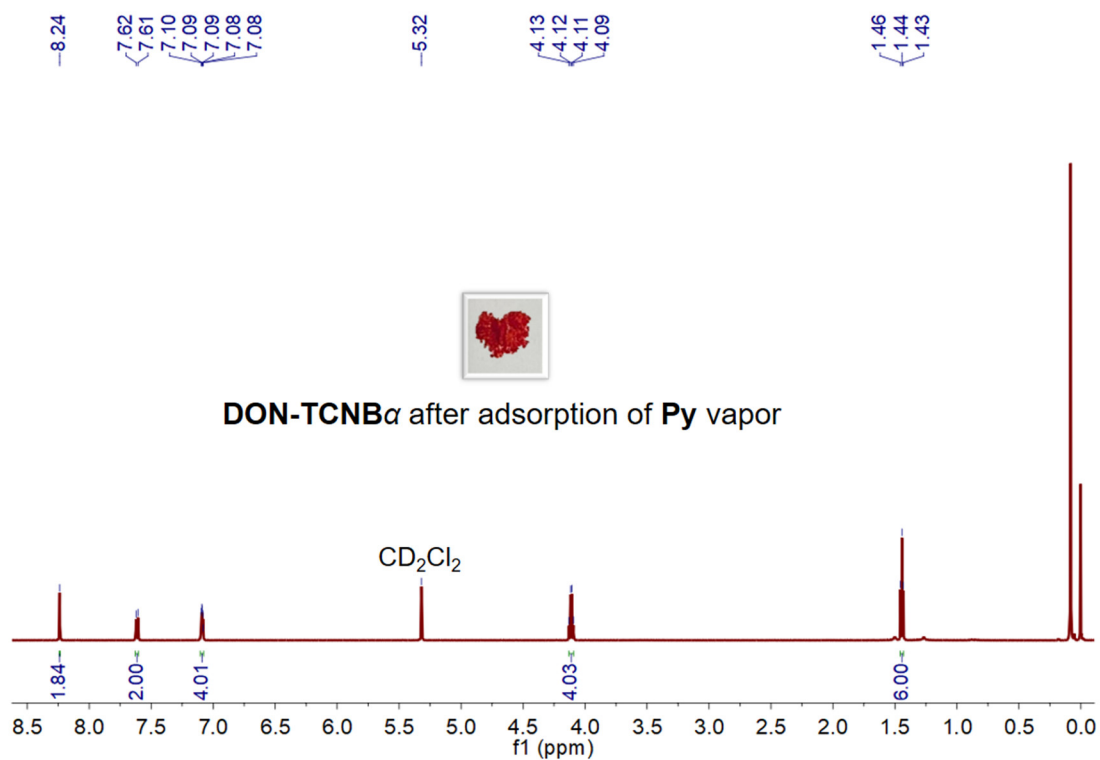

**Supplementary Figure 88.** <sup>1</sup>H NMR spectrum (600 MHz, CD<sub>2</sub>Cl<sub>2</sub>, 293 K) of DON-TCNB $\alpha$  after adsorption of Py vapor for 24 h.

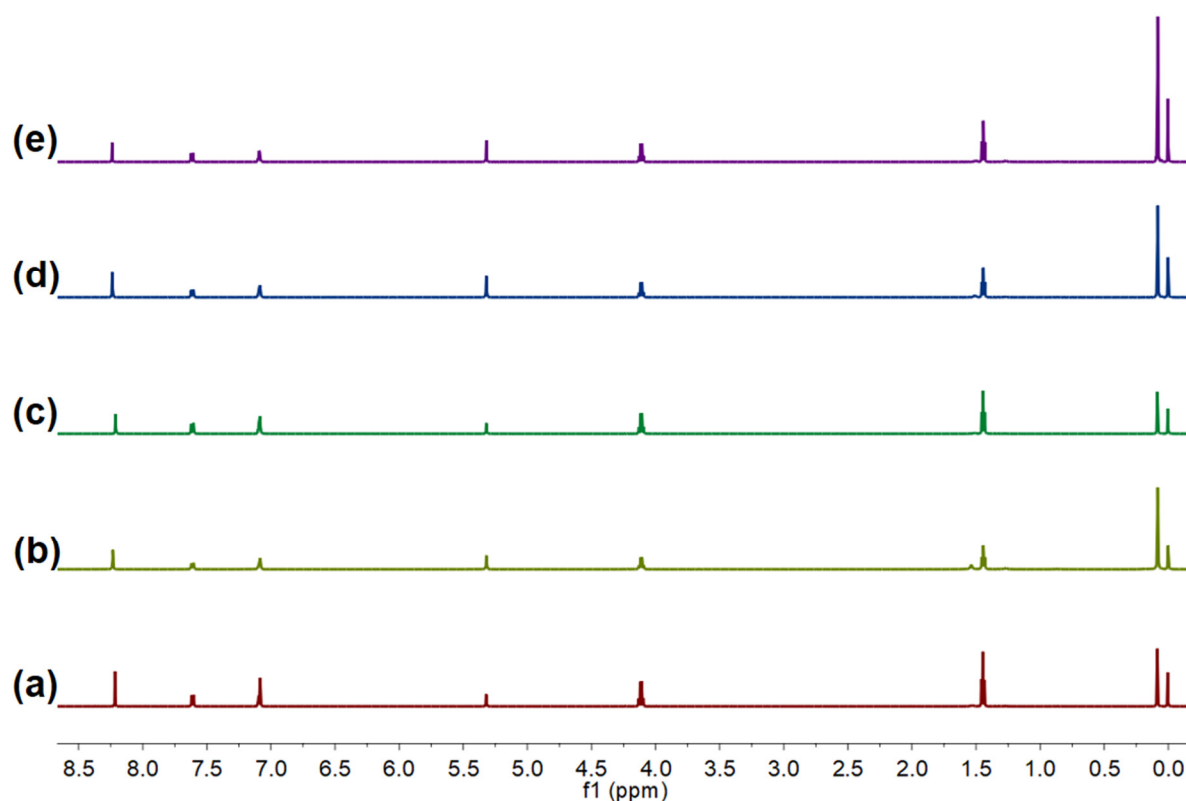

**Supplementary Figure 89.**  $^1\text{H}$  NMR spectra (600 MHz,  $\text{CD}_2\text{Cl}_2$ , 293 K) of DON-TCNB $\alpha$ : (a) original DON-TCNB $\alpha$ ; after adsorption of (b) Bz vapor; (c) Cy vapor; (d) Tol vapor and (e) Py vapor, respectively.

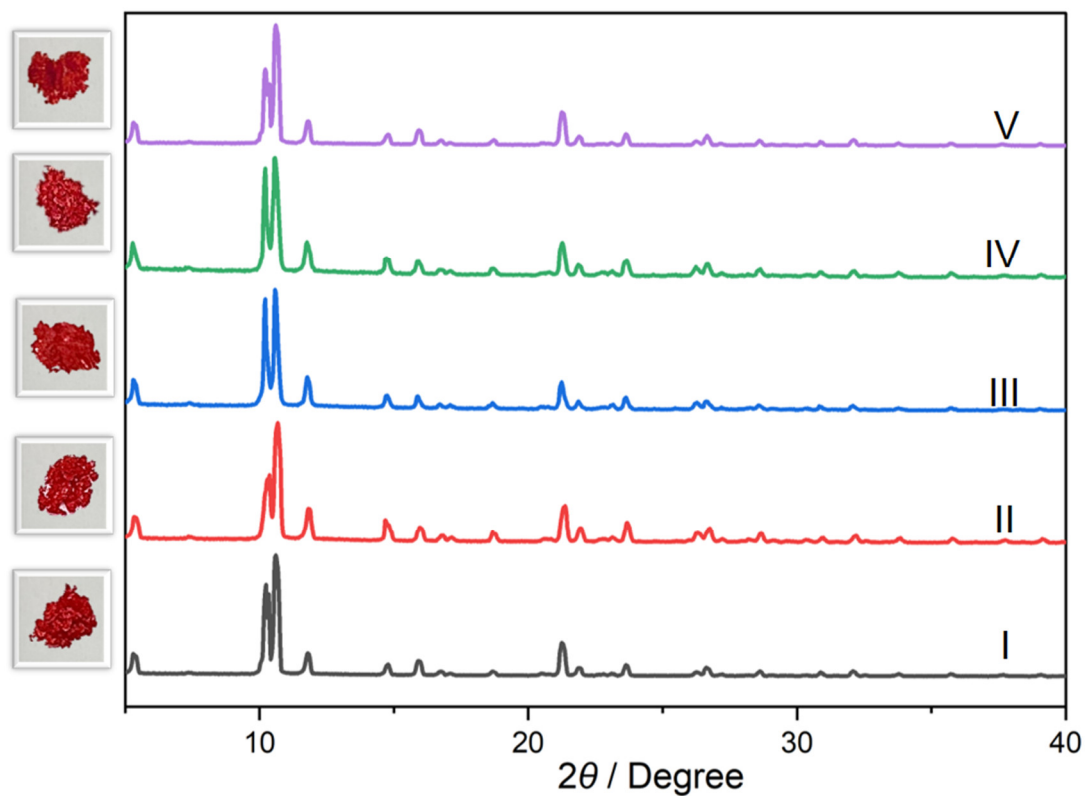

**Supplementary Figure 90.** PXRD patterns of DON-TCNB $\alpha$ : (I) original DON-TCNB $\alpha$ ; (II) after adsorption of Bz vapor; (III) after adsorption of Cy vapor; (IV) after adsorption of Tol vapor; (V) after adsorption of Py vapor.

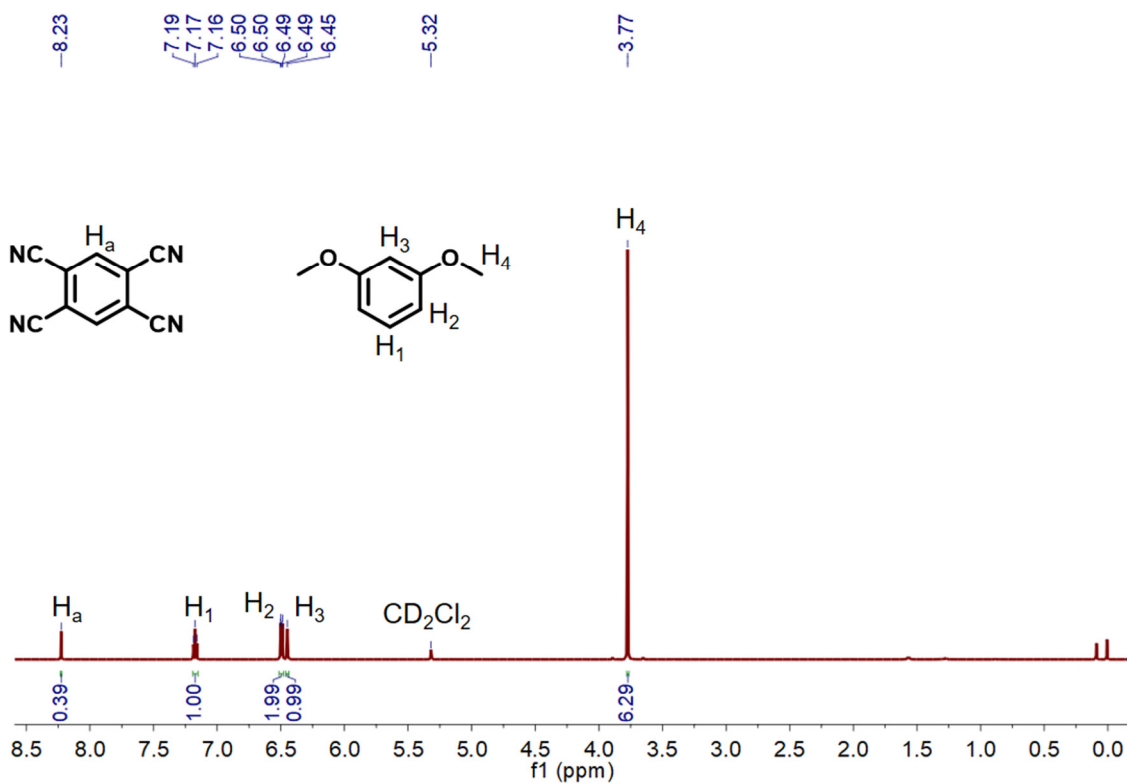

**Supplementary Figure 91.** <sup>1</sup>H NMR spectrum (600 MHz, CD<sub>2</sub>Cl<sub>2</sub>, 293 K) of DOB-TCNB $\alpha$ .

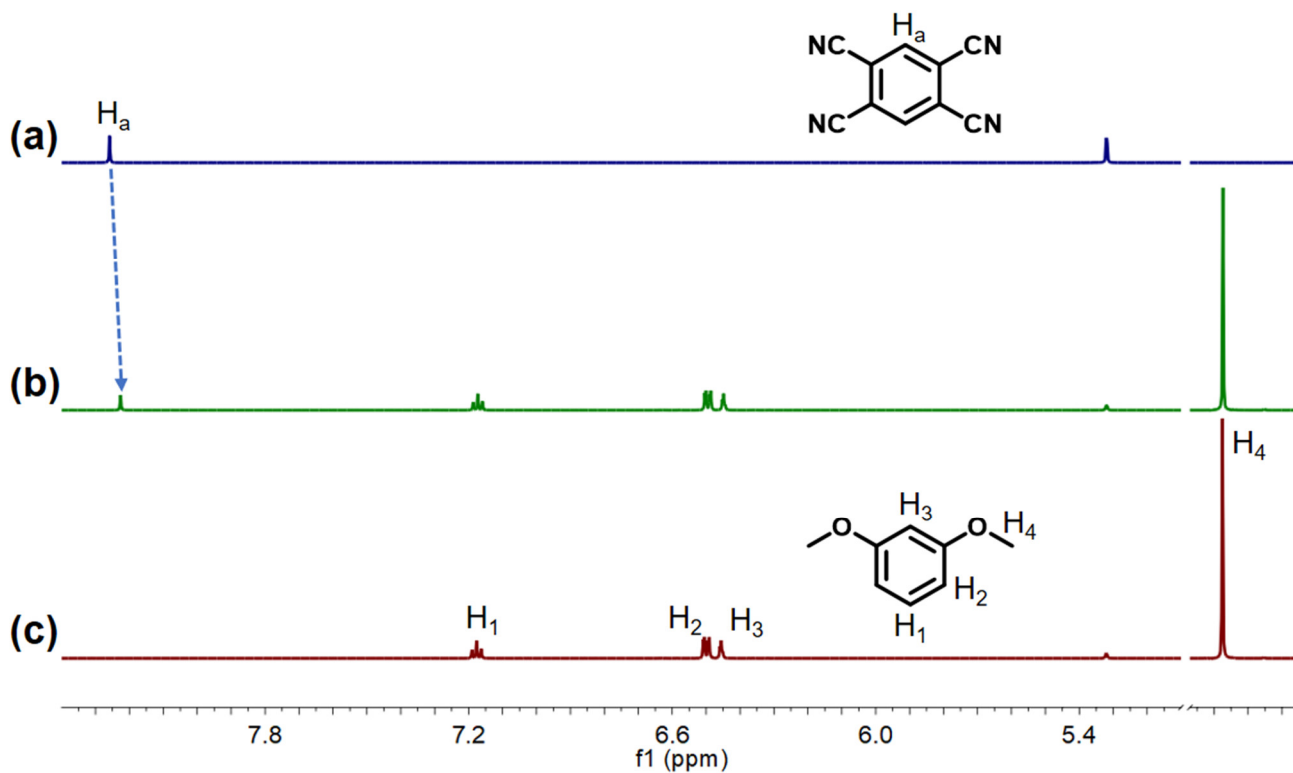

**Supplementary Figure 92.** Partial <sup>1</sup>H NMR spectra (500 MHz, CD<sub>2</sub>Cl<sub>2</sub>, 293 K) of (a) free TCNB (10.0 mM), (b) DOB (10.0 mM) and TCNB (10.0 mM), and (c) free DOB (10.0 mM).

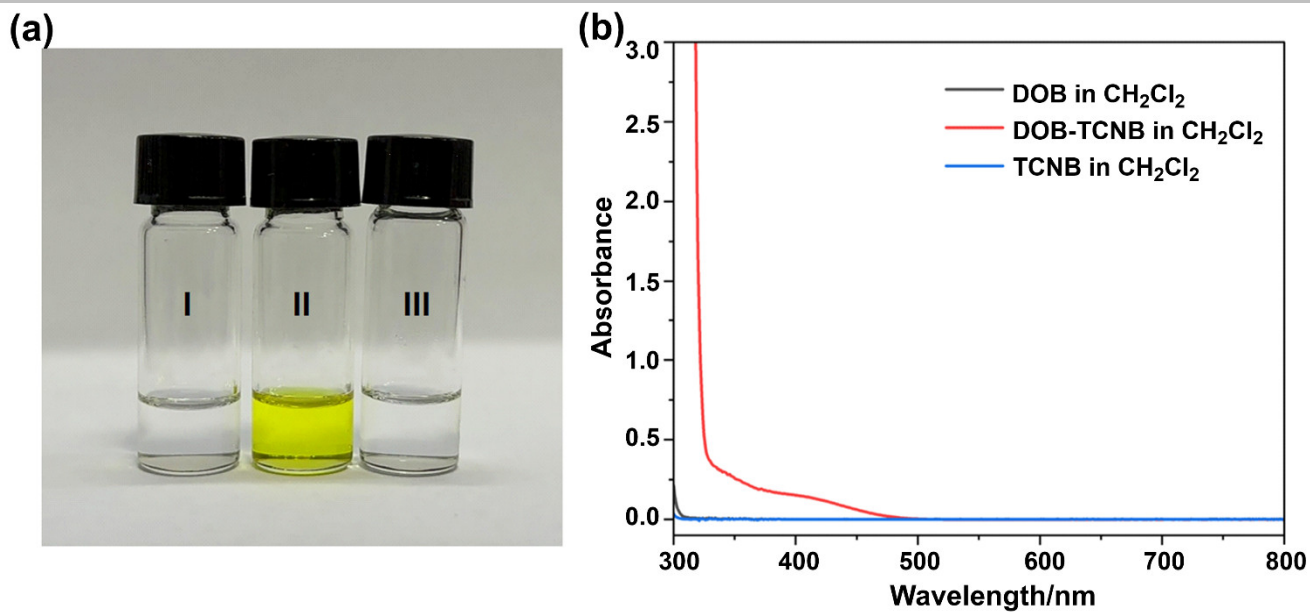

**Supplementary Figure 93.** (a) Images: (I) DOB (5.00 mM) in  $\text{CH}_2\text{Cl}_2$ ; (II) DOB (5.00 mM) and TCNB (5.00 mM) in  $\text{CH}_2\text{Cl}_2$ ; (III) TCNB (5.00 mM) in  $\text{CH}_2\text{Cl}_2$ . (b) UV-vis spectra: DOB (5.00 mM); DOB (5.00 mM) and TCNB (5.00 mM); TCNB (5.00 mM).

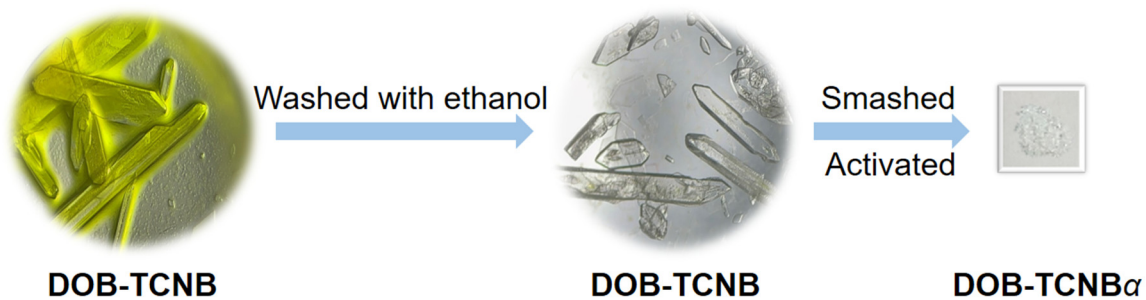

**Supplementary Figure 94.** Images of DOB, DOB-TCNB and DOB-TCNB $\alpha$ .





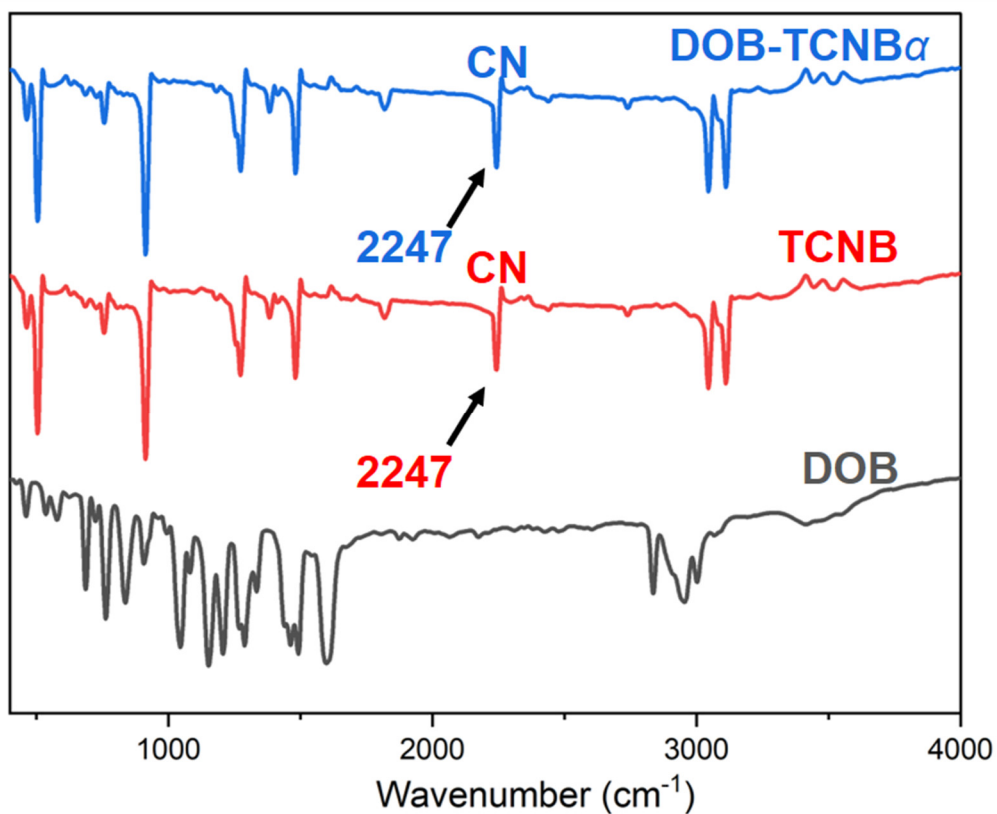

**Supplementary Figure 97.** FT-IR spectra of DOB, TCNB and DOB-TCNB $\alpha$ .

### 3. Supplementary Reference

1. Zhou, J., Yu, G., Li, Q., Wang, M. & Huang, F. Separation of benzene and cyclohexane by nonporous adaptive crystals of a hybrid[3]arene. *J. Am. Chem. Soc.* **142**, 2228–2232 (2020).
