# Supplementary material for: Separation of benzene and toluene associated with vapochromic behaviors by hybrid[4]arene-based co-crystals
Source: PubMed Central journal article supplement (PMC10858960; doi:10.1038/s41467-024-45592-6), 2024-02-10
Supplement: 41467_2024_45592_MOESM3_ESM.pdf [file 41467_2024_45592_MOESM3_ESM.pdf]

## **Description of Additional Supplementary Files**

**File Name:** Supplementary Data 1

**Description:** Cartesian Coordinates of the optimised structures for H-TCNB@Py.

**File Name:** Supplementary Data 2

**Description:** Cartesian Coordinates of the optimised structures for H-TCNB@Tol.
